# Supplementary material
Source: PubMed Central journal article supplement (PMC11000525)
Supplement: NIHMS1973831-supplement-Supporting_Information.pdf [file NIHMS1973831-supplement-Supporting_Information.pdf]

## **Total Synthesis of (+)-Shearilicine**

Daria E. Kim,<sup>†</sup> Yingchuan Zhu,<sup>†</sup> Shingo Harada,<sup>‡</sup> Isaiah Aguilar,<sup>†</sup> Abbigayle E. Cuomo,<sup>†</sup>  
Minghao Wang,<sup>†</sup> and Timothy R. Newhouse<sup>†\*</sup>

<sup>†</sup>Department of Chemistry, Yale University, 225 Prospect Street, New Haven, Connecticut  
06520-8107, United States

<sup>‡</sup>Graduate School of Pharmaceutical Sciences, Chiba University, Chiba, 260-8675, Japan

*E-mail : timothy.newhouse@yale.edu*

## Table of Contents

|                                                                                                                                                                                          |     |
|------------------------------------------------------------------------------------------------------------------------------------------------------------------------------------------|-----|
| General Experimental .....                                                                                                                                                               | S3  |
| Synthesis of Silyl Enol Ether <b>6</b> .....                                                                                                                                             | S4  |
| Synthesis of Ketone <b>7</b> .....                                                                                                                                                       | S7  |
| Synthesis of Butenolide <b>8</b> .....                                                                                                                                                   | S11 |
| Synthesis of Tricycle <b>3</b> .....                                                                                                                                                     | S15 |
| Synthesis of Indole <b>9</b> .....                                                                                                                                                       | S18 |
| Synthesis of Indole <b>10</b> .....                                                                                                                                                      | S22 |
| Synthesis of Olefin <b>2</b> .....                                                                                                                                                       | S26 |
| General Experimental Procedure for Ligand Optimization to Access Carbazole <b>15</b> .....                                                                                               | S29 |
| <br>                                                                                                                                                                                     |     |
| Synthesis of Carbazole <b>15</b> .....                                                                                                                                                   | S30 |
| Synthesis of Shearilicine ( <b>1</b> ).....                                                                                                                                              | S33 |
| <br>                                                                                                                                                                                     |     |
| Table S1. Comparison of Synthetic and Natural <sup>1</sup> H NMR for Shearilicine ( <b>1</b> ) ..                                                                                        | S37 |
| Table S2. Comparison of Synthetic and Natural <sup>13</sup> C NMR for Shearilicine ( <b>1</b> ) ..                                                                                       | S39 |
| <br>                                                                                                                                                                                     |     |
| Computational Details .....                                                                                                                                                              | S40 |
| <br>                                                                                                                                                                                     |     |
| Figure S1. Gibbs Free-Energy Profile for the Reaction Process of Pd-Mediated Heck Cyclization. ....                                                                                      | S41 |
| Figure S2. Comparison of Gibbs Free-Energies for the Reaction Process of the Migratory Insertion and <i>syn</i> β-hydride Elimination Using CataCXium Ligand and PPh <sub>3</sub> . .... | S42 |
| <br>                                                                                                                                                                                     |     |
| Computational Methods for Attractive Dispersion .....                                                                                                                                    | S92 |
| <br>                                                                                                                                                                                     |     |
| Figure S3. Method to Evaluate Attractive Dispersion Interactions .....                                                                                                                   | S93 |
| Figure S4. Evaluation of Attractive Dispersion Interactions via DFT Calculations Using Grimme's D3(BJ) Dispersion Correction. ....                                                       | S93 |
| <br>                                                                                                                                                                                     |     |
| Determining Anion-Ligand/Substrate Interactions .....                                                                                                                                    | S94 |
| <br>                                                                                                                                                                                     |     |
| Table S3. Associated Distances between the CataCXium Ligand, Substrate and the Coordinating Acetate Anion.....                                                                           | S94 |
| Table S4. Associated Distances between the PPh <sub>3</sub> Ligand, Substrate and the Coordinating Acetate Anion. ....                                                                   | S94 |
| <br>                                                                                                                                                                                     |     |
| References .....                                                                                                                                                                         | S98 |

## General Experimental

**General Experimental Procedures:** All reactions were carried out under an inert nitrogen atmosphere with dry solvents under anhydrous conditions unless otherwise stated. All reactions were capped with a rubber septum or Teflon-coated silicon microwave cap unless otherwise stated. Stainless steel cannula or syringes were used to transfer solvent, and air- and moisture-sensitive liquid reagents. Reactions were monitored by thin-layer chromatography (TLC) and carried out on 0.25 mm Merck silica gel plates (60F-254) using UV light as the visualizing agent and potassium permanganate or an acidic solution of *p*-anisaldehyde as developing agents. Flash column chromatography employed SiliaFlash®P60 (40–60  $\mu\text{m}$ , 230–400 mesh) silica gel purchased from SiliCycle Inc.

**Materials:** All reaction solvents were purified using a Seca solvent purification system by Glass Contour, with the exception of *tert*-butanol and  $\text{H}_2\text{O}$ . *Tert*-butanol was purchased from Fischer Scientific and used as received. Deionized water was taken from the tap and used as is.  $\text{Sc}(\text{OTf})_3$ , *n*-BuLi (2.7 M in Hex), MeLi (1.6 M in THF), CsF,  $\text{Zn}(\text{TMP})_2$ ,  $\text{Pd}(\text{OAc})_2$ , 2-(Di-*tert*-butylphosphino)-1-phenylindole,  $\text{K}_2\text{OsO}_4 \cdot 2\text{H}_2\text{O}$  and (DHQ)<sub>2</sub>PHAL were purchased from Sigma-Aldrich. CuI,  $\text{Mo}(\text{CO})_6$  and  $\text{CuSO}_4$  were purchased from Strem Inc. The molarity of MeLi solutions and *n*-BuLi solutions was determined by titration with *N*-benzylbenzamide. All other reagents were used as received without further purification, unless otherwise stated.

**Instrumentation:** All new compounds were characterized by means of  $^1\text{H}$ -NMR,  $^{13}\text{C}$ -NMR, FT-IR (thin film), HR-MS and polarimetry. Copies of the  $^1\text{H}$ - and  $^{13}\text{C}$ -NMR spectra can be found at the end of each experimental procedure. NMR spectra were recorded using a Varian 400 MHz NMR spectrometer, Varian 500 MHz NMR spectrometer, or Varian 600 MHz NMR spectrometer. All  $^1\text{H}$ -NMR data are reported in  $\delta$  units, parts per million (ppm), and were calibrated relative to the signals for residual chloroform (7.26 ppm) in deuteriochloroform ( $\text{CDCl}_3$ ) or for residual dichloromethane (5.33 ppm) in dichloromethane- $d_2$  ( $\text{CD}_2\text{Cl}_2$ ). All  $^{13}\text{C}$ -NMR data were reported in ppm relative to  $\text{CDCl}_3$  (77.16 ppm) or  $\text{CD}_2\text{Cl}_2$  (54.24 ppm), and were obtained with  $^1\text{H}$  decoupling unless otherwise stated. The following abbreviations or combinations thereof were used to explain the multiplicities: s= singlet, d= doublet, t= triplet, q= quartet, br= broad, m= multiplet, and a= apparent. All IR spectra were taken on an FT-IR/Raman Thermo Nicolet 6700. High resolution mass spectra (HR-MS) were recorded on a Bruker microTOF mass spectrometer using ESI-TOF (electrospray ionization-time of flight). All optical rotations were taken on a Rudolph Research Analytical Autopol VI Automatic Polarimeter.

## Synthesis of Silyl Enol Ether 6:

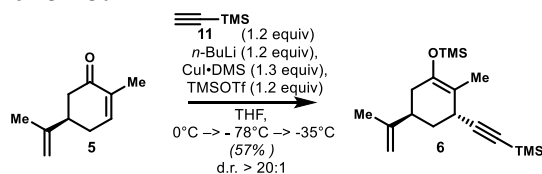

A flame-dried, three-necked, 1 L round-bottomed flask was equipped with a magnetic stir bar, fitted with two dropping funnels, sealed with a rubber septum, evacuated and backfilled with nitrogen three times and placed under a nitrogen atmosphere. **11** (11.7 g, 119.8 mmol, 1.2 equiv) was added to the reaction flask in a single portion via syringe and dissolved in anhydrous THF (150 mL, 0.80 M). The reaction apparatus was cooled to 0 °C by transferring to an ice-water bath. After stirring at this temperature for 10 minutes, *n*-BuLi (2.7 M solution in hexanes, 45.0 mL, 119.8 mmol, 1.2 equiv) was added dropwise via the dropping funnel over the course of 10 minutes. The resulting solution was left to stir at 0 °C for 20 minutes, after which CuI·DMS (35.4 g, 129.8 mmol, 1.3 equiv) was added to the flask as a solid in a single portion. This reaction mixture was stirred at 0 °C for an additional 1 hour, after which it was cooled to -78 °C by transferring the reaction apparatus to a dry ice-acetone bath.

After stirring at -78 °C for 10 minutes, freshly distilled trimethylsilyl trifluoromethanesulfonate (22 mL, 119.8 mmol, 1.2 equiv) was added to the flask dropwise via the second dropping funnel over the course of 10 minutes. Following this, the reaction mixture was allowed to stir for 5 minutes at -78 °C before a solution of (*R*)-carvone (**5**) (15.0 g, 99.9 mmol, 1.0 equiv) in anhydrous THF (109 mL, 1.1 M) was added to the flask by cannula over a span of 20 minutes. Once the addition was completed, the reaction was allowed to stir for 5 minutes at -78 °C, after which the reaction apparatus was transferred to a dry ice-acetonitrile bath to warm the reaction mixture to -35 °C.

After stirring at -35 °C for 3 hours, the reaction was quenched by pouring into sat. aq. NH<sub>4</sub>Cl (500 mL). The layers were separated and the aqueous layer was extracted with Et<sub>2</sub>O (3 × 500 mL). The combined organic layers were rinsed with sat. aq. NaHCO<sub>3</sub> (3 × 500 mL), washed with brine (500 mL) and concentrated under reduced pressure by rotary evaporation to provide a mixture of crude yellow liquid and bright yellow solids. The mixture was filtered through a silica plug with hexane as the washing solvent to afford a crude yellow liquid. Purification by flash column chromatography on silica gel (0% to 2% Et<sub>2</sub>O in pentane) afforded **6** (18.2 g, 57%, d.r. >20:1) as a colorless clear liquid.

**Rf:** 0.85 (2% Et<sub>2</sub>O/98% hexanes)

**<sup>1</sup>H NMR** (500 MHz, CDCl<sub>3</sub>): δ 4.77 (s, 1H), 4.72 (s, 1H), 3.02 (d, *J* = 4.8 Hz, 1H), 2.60 (td, *J* = 10.7, 4.1 Hz, 1H), 2.08 (dd, *J* = 16.5, 5.1 Hz, 1H), 2.02–1.95 (m, 1H), 1.89 (add, *J* = 12.4, 1.6 Hz, 1H), 1.74 (s, 3H), 1.67 (s, 3H), 1.53 (atd, *J* = 12.8, 5.4 Hz, 1H), 0.18 (s, 9H), 0.12 (s, 9H)

**<sup>13</sup>C NMR** (125 MHz, CDCl<sub>3</sub>): δ 148.8, 144.1, 111.7, 109.9, 109.1, 84.4, 38.4, 35.7, 34.1, 33.3, 21.1, 15.1, 0.8, 0.3

**IR** (cm<sup>-1</sup>): 2163, 1688, 1447, 1184, 1065, 927, 833, 757, 697, 637

**Optical Rotation:** [ $\alpha$ ]<sub>D</sub><sup>20</sup> = +139.43° (*c* 0.18, CHCl<sub>3</sub>)

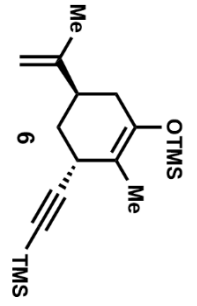

—7.26 CDCl<sub>3</sub>

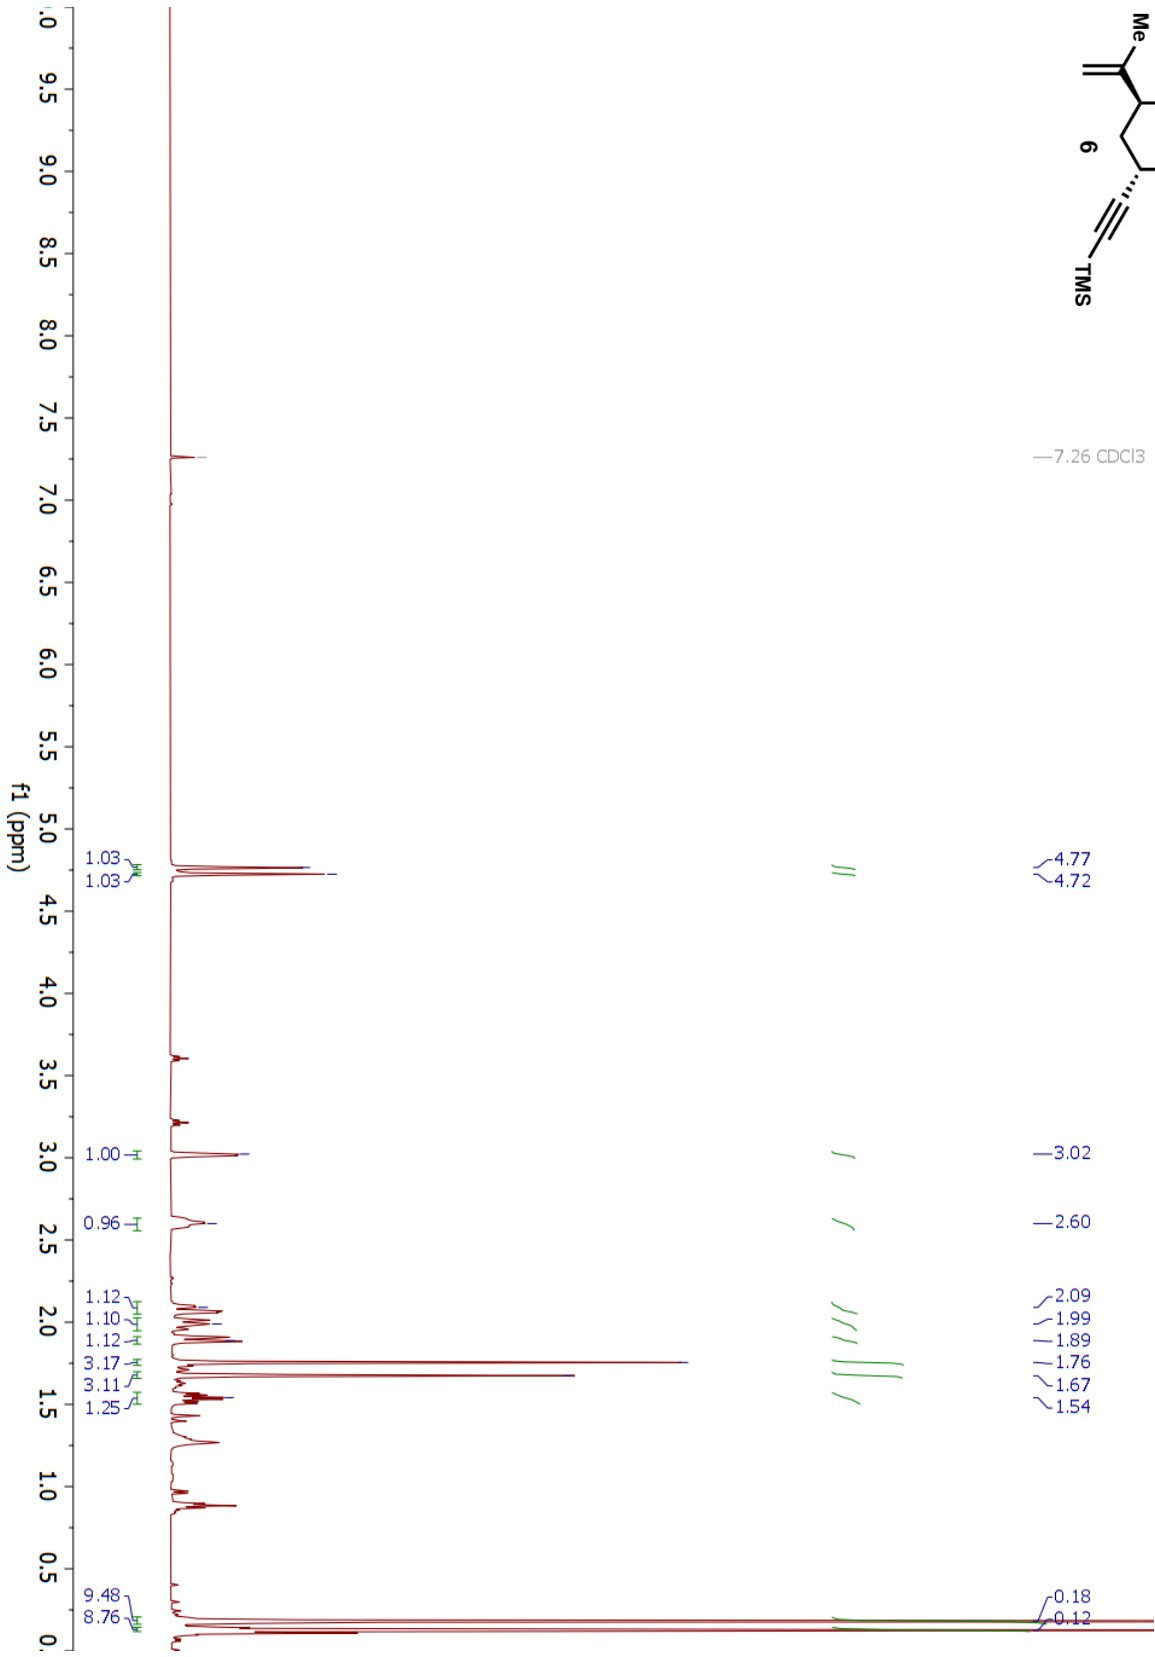

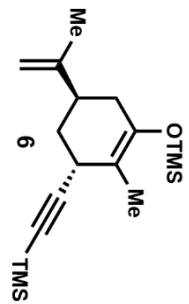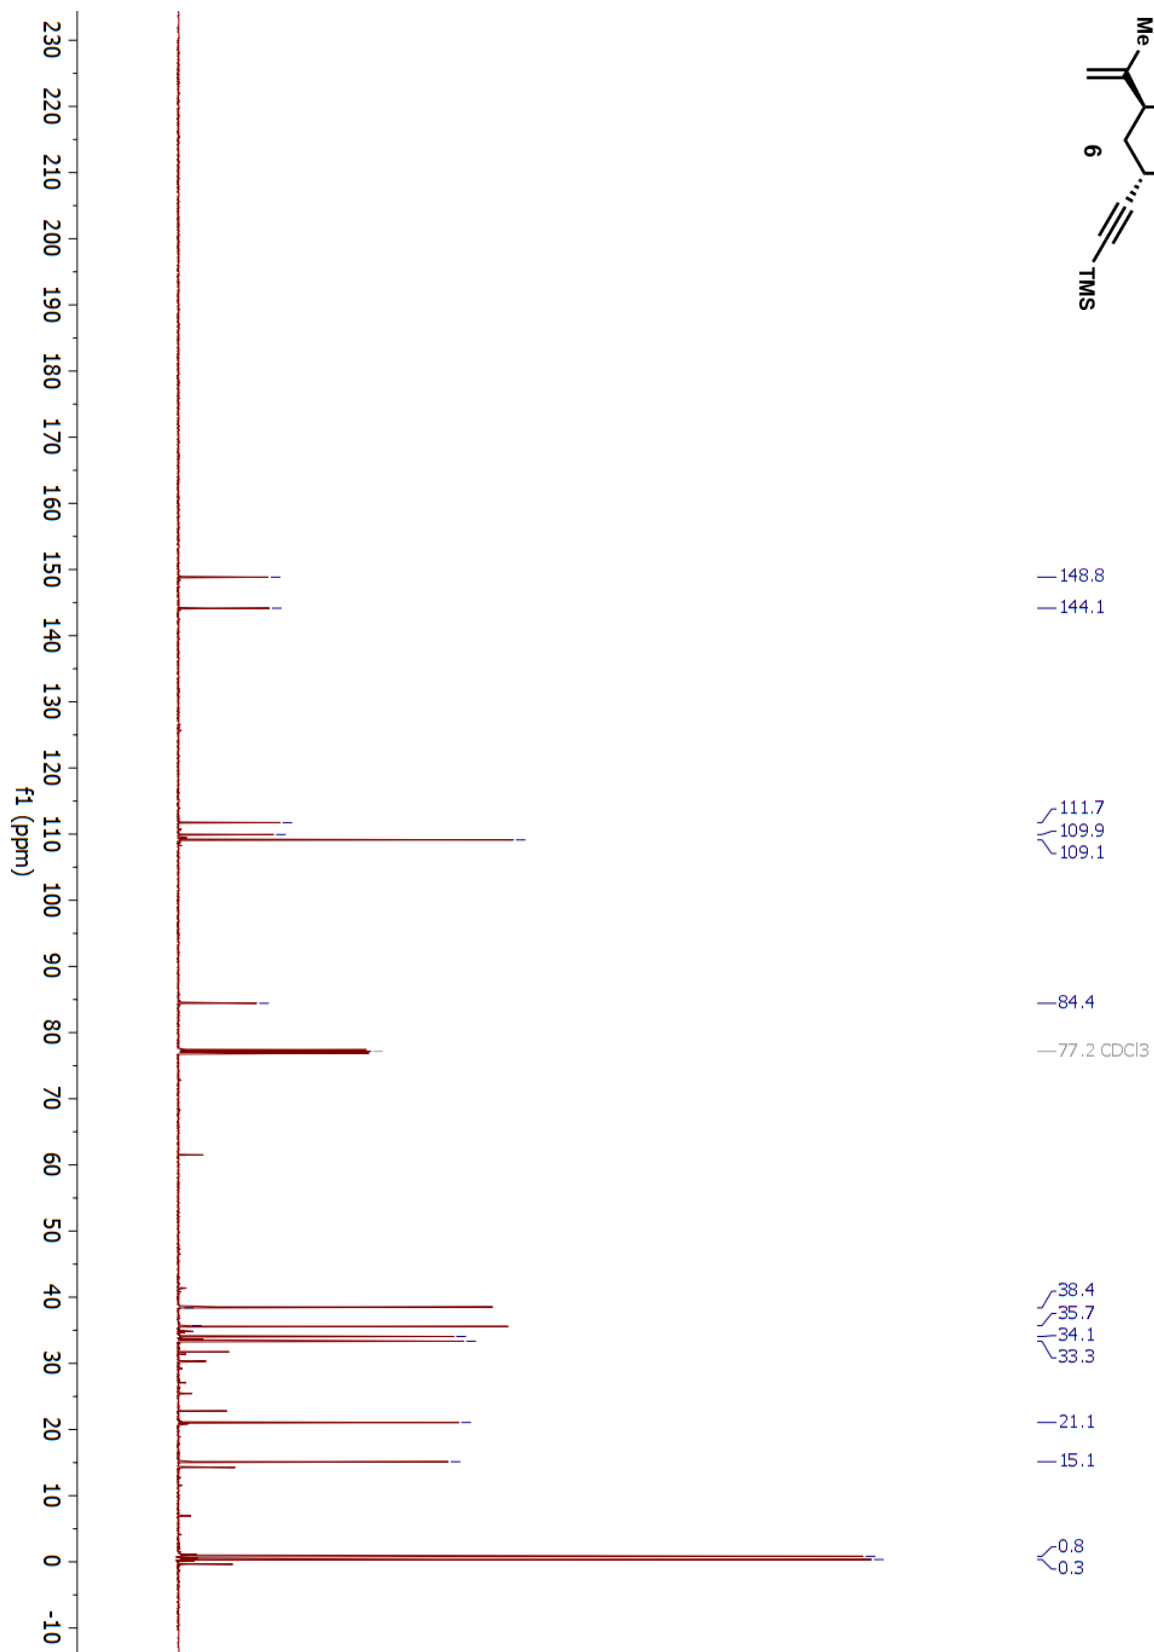

## Synthesis of Ketone 7:

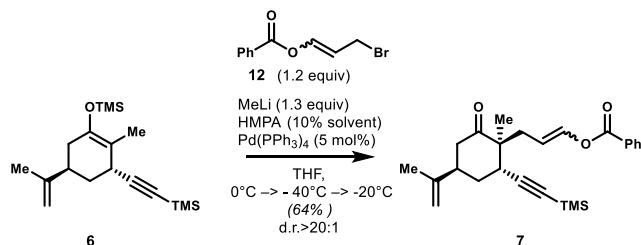

A flame-dried, 1 L round-bottomed flask was equipped with a magnetic stir bar, sealed with a rubber septum, and was charged with **12**<sup>1</sup> (20.4 g, 84.3 mmol, 1.2 equiv), which was prepared according to reported procedures. The flask was then evacuated and backfilled with nitrogen three times and placed under a nitrogen atmosphere. **12** was dissolved in anhydrous THF (350 mL, 0.24 M) and cooled to 0 °C by transferring the reaction apparatus to an ice-water bath. Pd(PPh<sub>3</sub>)<sub>4</sub> (4.06 g, 3.51 mmol, 5 mol%) was added to the mixture in a single portion and the solution was left to stir at 0 °C for 1 hour while the other flask was being prepared.

An additional flame-dried 2 L round-bottomed flask was equipped with a magnetic stir bar, fitted with a dropping funnel, and charged with **6** (22.5 g, 70.2 mmol, 1.0 equiv), after which the reaction apparatus was evacuated and backfilled with nitrogen three times and placed under a nitrogen atmosphere. **6** was dissolved in anhydrous THF (350 mL, 0.2 M) and the resulting solution was cooled to 0 °C by transferring the reaction apparatus to an ice-water bath. After stirring at this temperature for 15 minutes, MeLi (1.6 M solution in Et<sub>2</sub>O, 58.0 mL, 91.3 mmol, 1.3 equiv) was added dropwise via the dropping funnel over the course of 10 minutes. The resulting solution was left to stir at 0 °C for 30 minutes, after which the dropping funnel was replaced with a rubber septum and HMPA (35.0 mL, 2.4 M) was added to the reaction as a single portion via syringe. The resulting solution was cooled to -40 °C by transferring the reaction apparatus to an acetonitrile-dry ice bath. The solution containing **12** and Pd(PPh<sub>3</sub>)<sub>4</sub> in the first reaction flask was slowly cannulated into the flask containing **6** in a dropwise fashion over 30 minutes, after which the resulting solution was left to stir for 4 hours, during which the mixture was gradually warmed to -20 °C.

After stirring for 4 hours, the reaction was warmed to room temperature and quenched by pouring into sat. aq. NH<sub>4</sub>Cl (800 mL). The layers were separated and the aqueous layer was extracted with Et<sub>2</sub>O (3 × 800 mL). The combined organic layers were washed with brine (500 mL), dried over anhydrous Na<sub>2</sub>SO<sub>4</sub>, and concentrated under reduced pressure by rotary evaporation to provide a dark brown oil. Purification by flash column chromatography on silica gel (0 to 4% Et<sub>2</sub>O in hexanes) afforded pale yellow viscous oil **7** (18.4 g, 64%, d.r.>20:1) as an inseparable mixture of *E* and *Z* isomers (5:1).

**R<sub>f</sub>**: 0.26 (10% Et<sub>2</sub>O in hexanes)

**<sup>1</sup>H NMR** (500 MHz, CDCl<sub>3</sub>): δ 8.10–8.06 (m, 2.4H), 7.63–7.57 (m, 1.2H), 7.46 (at, *J* = 9.5 Hz, 2.4H), 7.38–7.34 (m, 1.2H), 5.48–5.43 (m, 1H), 4.85 (m, 1.4H), 4.71 (ov, 1.2H), 2.97–2.92 (m, 1.2H), 2.84–2.77 (m, 1.2H), 2.62 (m, 0.4H), 2.57–2.32 (m, 4.8 H), 2.10–1.95 (m, 2.4H), 1.77 (s, 3H), 1.74 (s, 0.6H), 1.26 (s, 0.6H), 1.24 (s, 3H), 0.15 (s, 9H), 0.10 (s, 1.8 H)

**<sup>13</sup>C NMR** (125 MHz, CDCl<sub>3</sub>): δ 212.6, 212.5, 163.7, 163.5, 147.1, 146.9, 137.9, 136.8, 133.8, 133.7, 130.1, 129.2, 128.8, 128.7, 111.3, 110.7, 109.8, 108.6, 106.2, 106.0, 89.2, 89.0, 51.0, 50.9, 42.6, 42.6, 41.2, 41.0, 38.0, 36.8, 34.9, 32.2, 31.1, 30.6, 21.5, 21.3, 20.6, 20.5, 1.2, 0.2, 0.1

**IR** (cm<sup>-1</sup>): 2957, 1730, 1713, 1263, 1258, 1128, 843, 760, 752

**ESI-HRMS** (m/z): [M+H]<sup>+</sup> calc'd for C<sub>25</sub>H<sub>33</sub>O<sub>3</sub>Si<sup>+</sup>: 409.2194; found: 409.2188

**Optical Rotation:** [α]<sub>D</sub><sup>20</sup> = -13.88° (c 1.2, CHCl<sub>3</sub>)



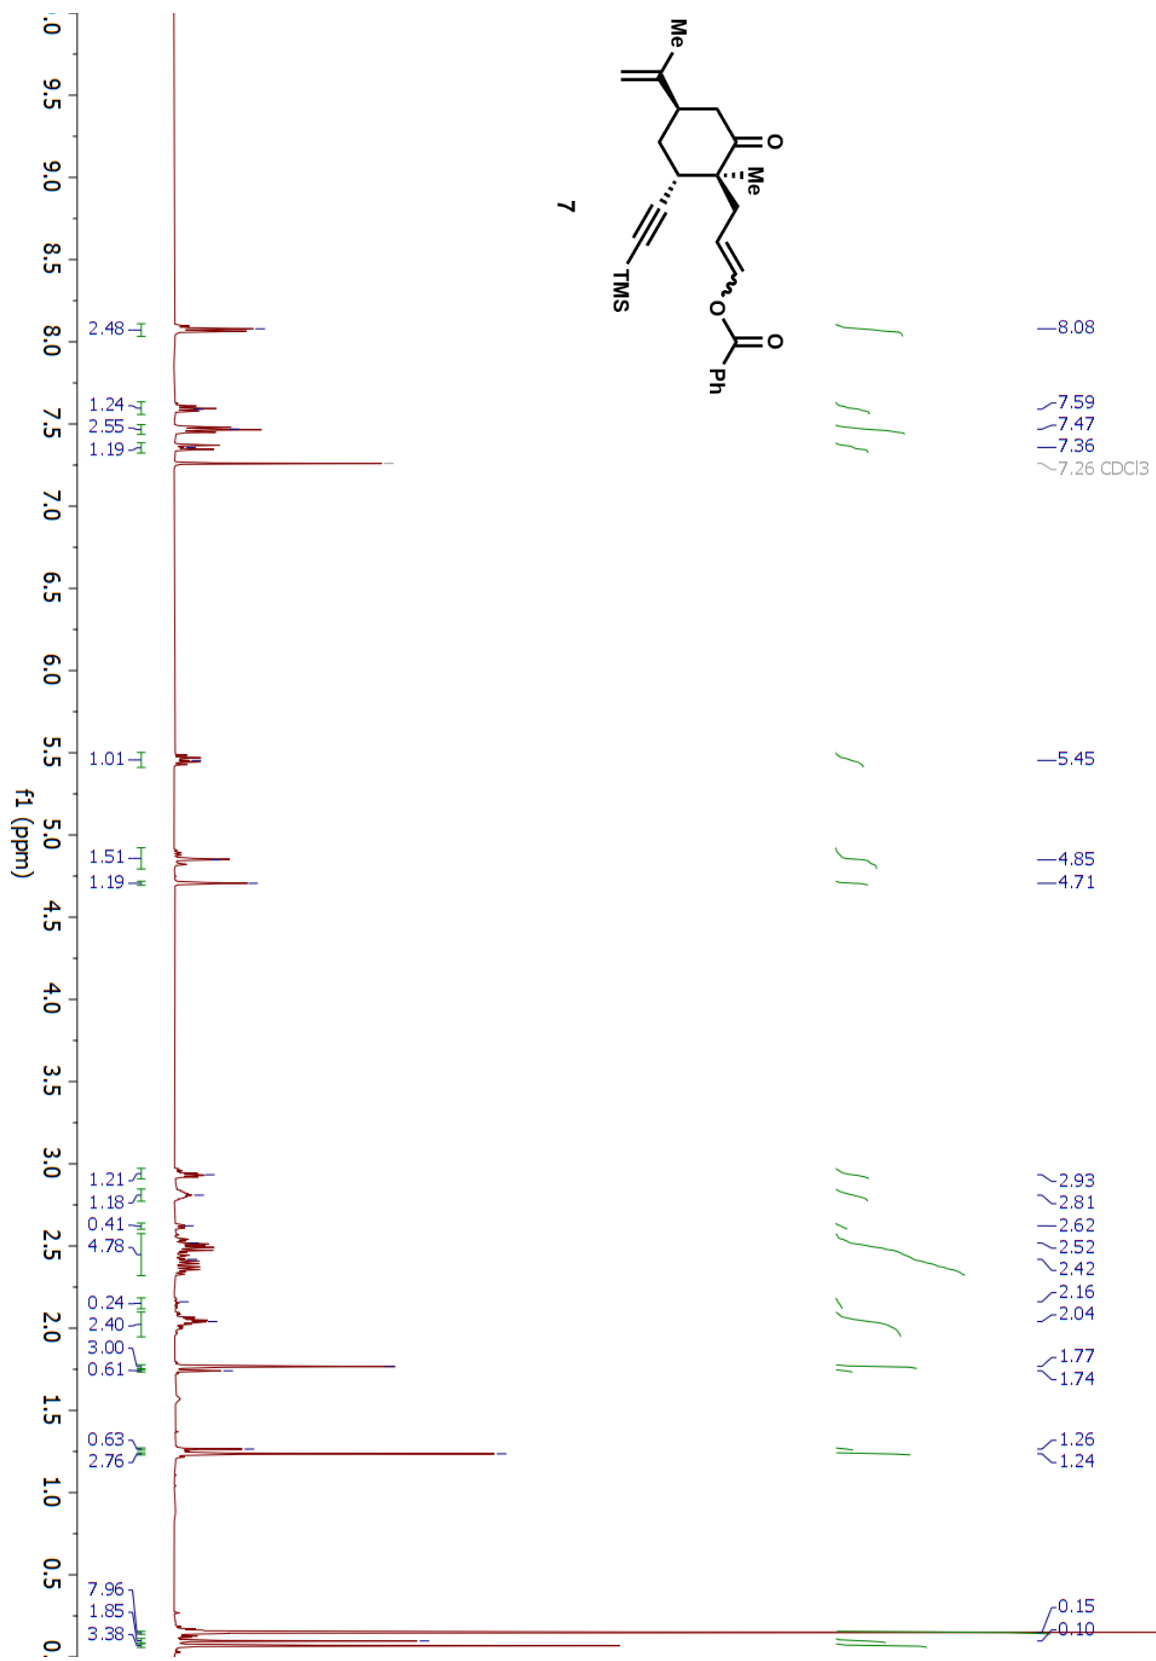

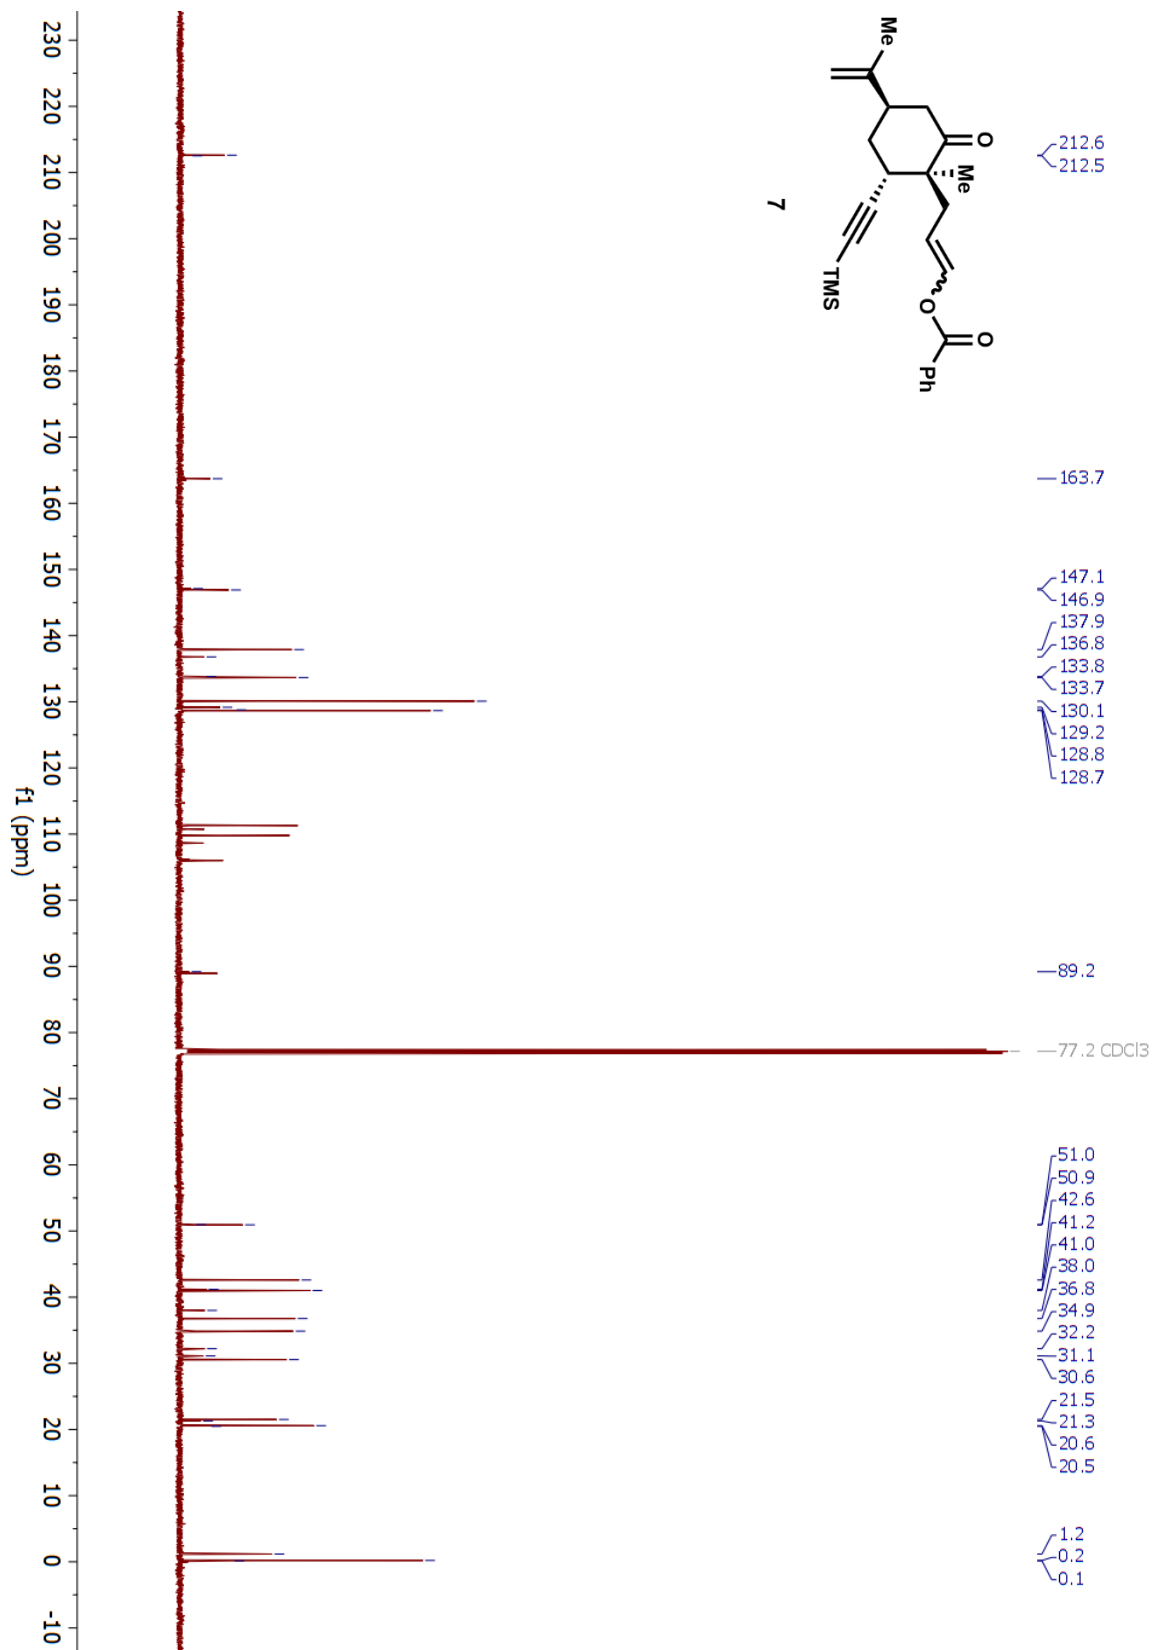

## Synthesis of Butenolide 8:

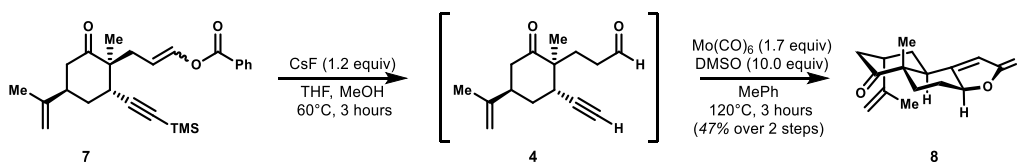

A 1L round-bottomed flask was equipped with a magnetic stir bar, fitted with a reflux condenser and charged with **7** (21.6 g, 52.8 mmol, 1.0 equiv), after which the reaction flask was placed under a nitrogen atmosphere. **7** was dissolved in a 1:1 mixture of methanol and THF (520 mL, 0.1 M). CsF (9.6 g, 63.4 mmol, 1.2 equiv) was added to the solution as a solid in a single portion. The resulting solution was heated to 60 °C by transferring the reaction apparatus to a preheated oil bath. The reaction mixture was stirred at this temperature for 3 hours.

After the starting material was fully consumed, the reaction apparatus was allowed to cool to room temperature and quenched by pouring into NaHCO<sub>3</sub> (500 mL). The layers were separated and the aqueous layer was extracted with DCM (3 × 500 mL). The combined organic layers were washed with brine, dried over anhydrous Na<sub>2</sub>SO<sub>4</sub>, and concentrated by rotary evaporation under reduced pressure. The crude material (**4**) was afforded as a yellow, viscous oil and was directly subjected to the subsequent reaction conditions without further purification.

A flame-dried 1L round-bottomed flask was equipped with a magnetic stir bar and charged with crude **4** and Mo(CO)<sub>6</sub> (23.7 g, 89.8 mmol, 1.7 equiv). The reaction flask was evacuated and placed under a carbon monoxide atmosphere. Toluene (350 mL, 0.15 M) and DMSO (37.5 mL, 528 mmol, 10.0 equiv) were sequentially added to the reaction flask. The resulting solution was sparged with carbon monoxide for 20 minutes. Following this, the reaction apparatus was fitted with a reflux condenser, sealed with a rubber septum and placed under a carbon monoxide atmosphere. The reaction apparatus was transferred to an oil bath and was heated to 120 °C. The reaction was allowed to stir for 3 hours at this temperature after which the reaction apparatus was transferred out of the oil bath and allowed to cool to room temperature.

The reaction mixture was quenched by pouring into sat. aq. NaHCO<sub>3</sub> (350 mL). The layers were separated and the aqueous layer was extracted with EtOAc (3 × 350 mL). The combined organic layers were washed with brine (500 mL), dried over anhydrous sodium sulfate, filtered, and concentrated under reduced pressure by rotary evaporation to provide a crude orange solid. Purification by flash column chromatography on silica gel (0 to 30% EtOAc in hexanes) afforded **8** (6.46 g, 47% over two steps) as a yellow granular solid.

R<sub>f</sub>: 0.32 (5% Et<sub>2</sub>O in DCM)

<sup>1</sup>H NMR (600 MHz, CDCl<sub>3</sub>): δ 5.80 (s, 1H), 4.94 (s, 1H), 4.73 (s, 1H), 4.67 (dd, *J* = 10.7, 7.2 Hz, 1H), 2.89–2.85 (m, 2H), 2.66 (d, *J* = 12.7 Hz, 1H), 2.58 (dd, *J* = 17.9, 4.9 Hz, 1H), 2.47–2.43 (m, 1H), 2.14 (atd, *J* = 13.6, 5.0 Hz, 1H), 1.99 (at, *J* = 14.5 Hz, 2H), 1.75 (s, 3H), 1.65–1.60 (m, 1H), 1.51–1.44 (m, 1H), 1.03 (s, 3H)

**<sup>13</sup>C NMR** (151 MHz, CDCl<sub>3</sub>): δ 212.5, 173.0, 171.6, 146.4, 113.9, 113.6, 81.1, 51.0, 40.9, 40.5, 40.4, 29.3, 29.1, 24.4, 22.4, 17.1

**IR** (cm<sup>-1</sup>): 2952, 1747, 1704, 1644, 1451, 1378, 1349, 1308, 1255, 1175, 1134, 1083, 1070, 1041, 1012, 937, 908, 852, 819, 728, 548, 509

**ESI-HRMS** (m/z): [M+H]<sup>+</sup> calc'd for C<sub>16</sub>H<sub>21</sub>O<sub>3</sub><sup>+</sup>: 261.1548; found: 261.1491

**Optical Rotation:** [α]<sub>D</sub><sup>20</sup> = +160.25 ° (c 0.2, CHCl<sub>3</sub>)

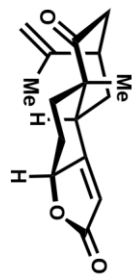

8

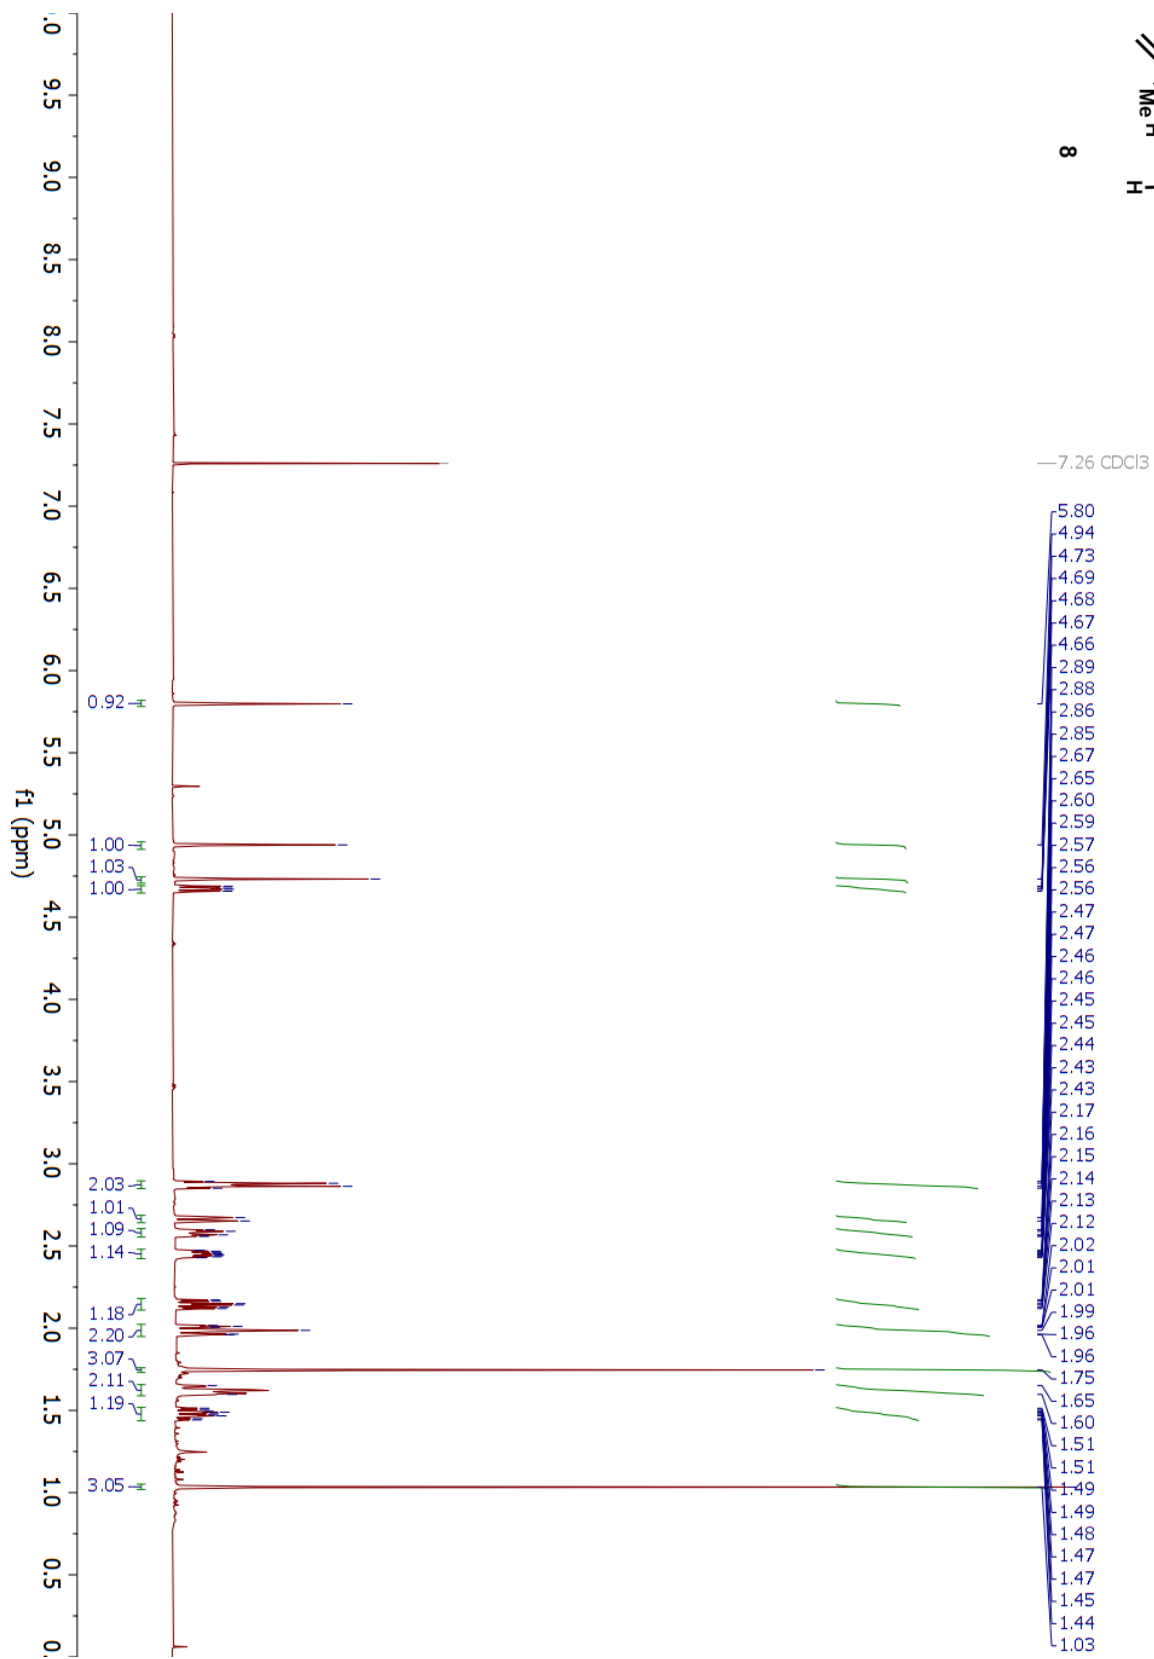

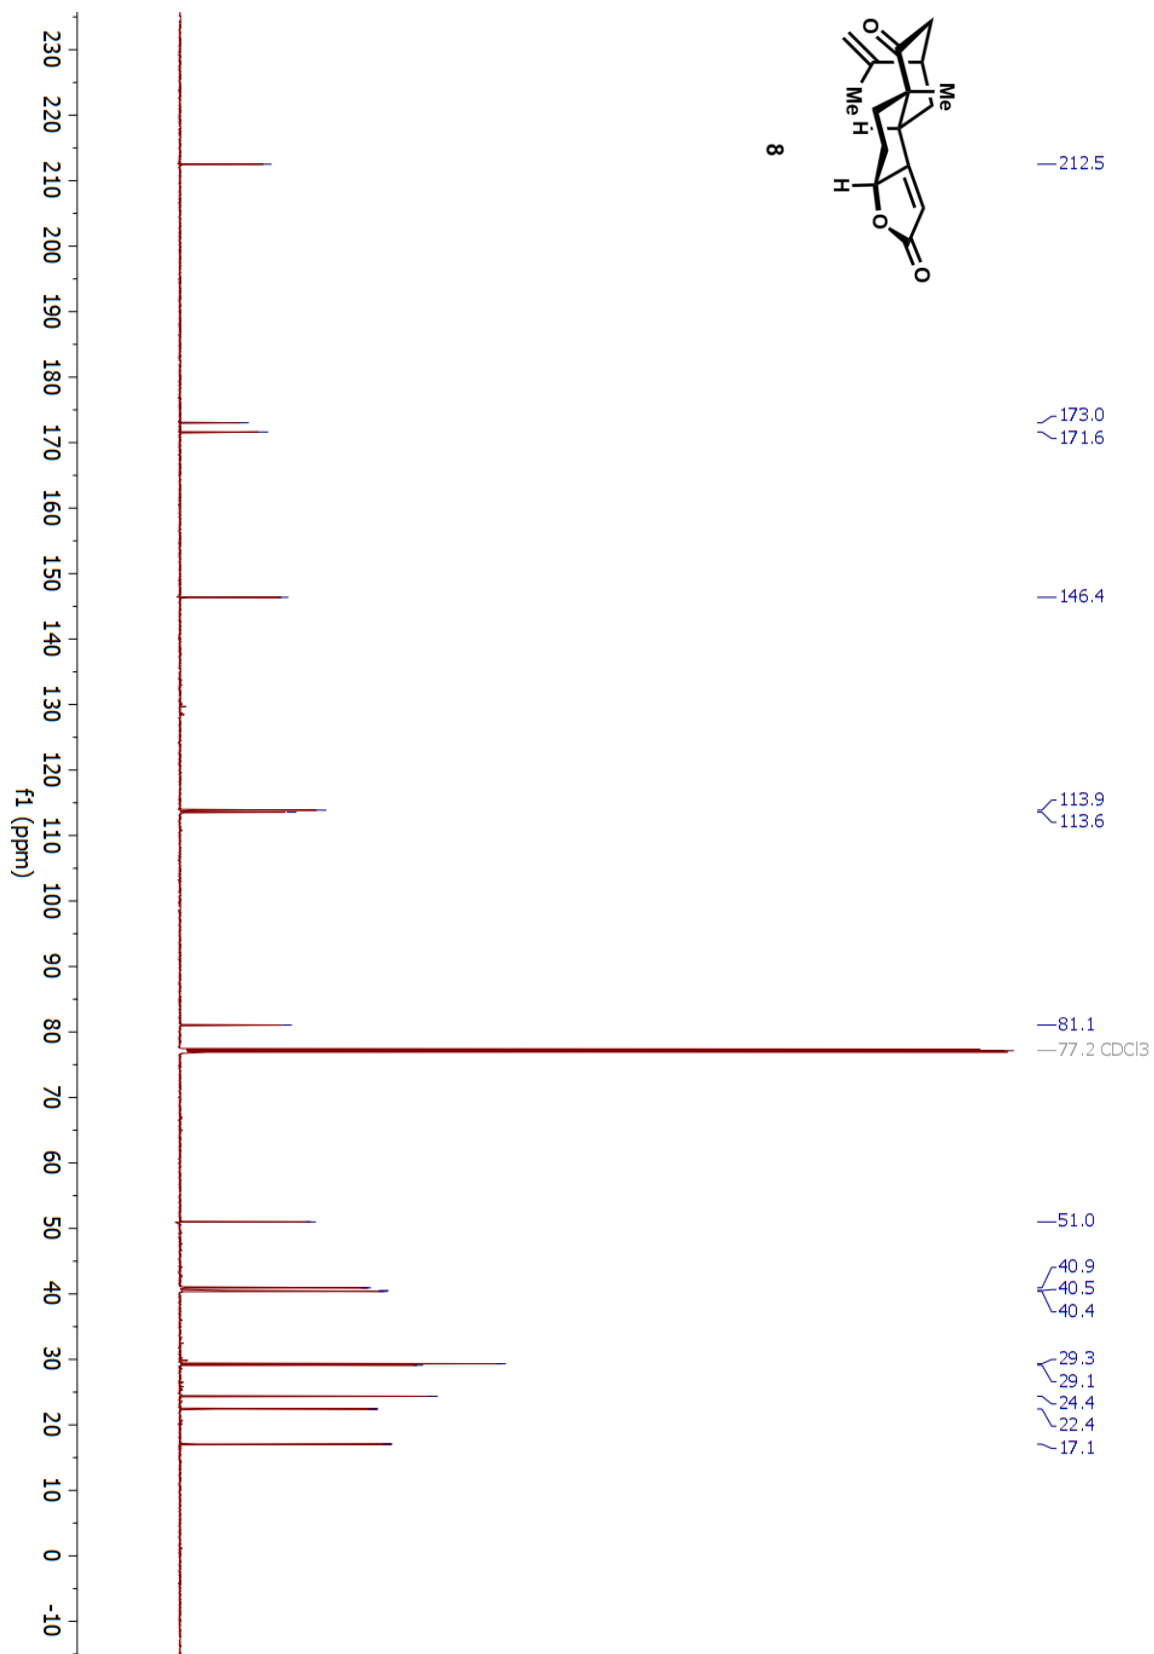

### Synthesis of Tricycle 3:

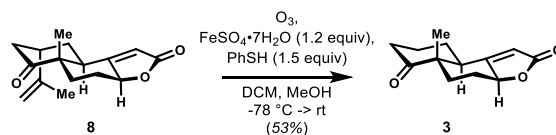

**8** (878 mg, 3.373 mmol, 1.0 equiv) was transferred to an open 250 mL round-bottomed flask and dissolved in 3:1 mixture of MeOH and DCM (85.0 mL, 0.04M). This solution was cooled to  $-78^\circ\text{C}$  by transferring the reaction flask to a dry ice-acetone bath. The mixture was stirred for 10 minutes, before ozone was bubbled through the solution until full consumption of the starting material was observed by TLC (ca. 5 minutes of bubbling). (Note: a 50% EtOAc/50% Hexane mobile phase was used to visualize the progression of the reaction.) Bubbling of ozone was ceased and nitrogen was bubbled through the solution for 2 minutes. Following this, PhSH (0.52 mL, 5.059 mmol, 1.5 equiv) was added to the reaction mixture dropwise at  $-78^\circ\text{C}$ , followed by the immediate addition of  $\text{FeSO}_4 \cdot 7\text{H}_2\text{O}$  (1.13 g, 4.065 mmol, 1.2 equiv) as a solid in a single portion.

The mixture was stirred at  $-78^\circ\text{C}$  for 15 minutes, after which the cooling bath was removed and the reaction was warmed to room temperature. The reaction was left to stir at ambient temperature overnight, after which the mixture was poured into  $\text{H}_2\text{O}$  (100 mL). The layers were separated and the aqueous layer was extracted with DCM ( $3 \times 100$  mL). The organic layers were combined and concentrated under reduced pressure by rotary evaporation to provide a crude orange solid. Purification by flash column chromatography on silica gel (0 to 2% Et<sub>2</sub>O in DCM) afforded **3** (394 mg, 53%) as a white granular solid.

**R<sub>f</sub>**: 0.21 (5% Et<sub>2</sub>O in DCM)

**<sup>1</sup>H NMR** (600 MHz, CDCl<sub>3</sub>):  $\delta$  5.81 (s, 1H), 4.68 (dd,  $J = 10.9, 7.2$  Hz, 1H), 2.73 (atd,  $J = 14.5, 7.1$  Hz, 1H), 2.53–2.46 (m, 2H), 2.35 (dd,  $J = 14.9, 5.1$  Hz, 1H), 2.21–2.16 (m, 1H), 1.99–1.89 (m, 3H), 1.82–1.76 (m, 1H), 1.73 (atd,  $J = 14.7, 3.7$  Hz, 1H), 1.49 (aqd,  $J = 14.9, 4.1$  Hz, 1H), 1.05 (s, 3H)

**<sup>13</sup>C NMR** (151 MHz, CDCl<sub>3</sub>):  $\delta$  212.5, 173.0, 171.3, 114.2, 81.0, 51.1, 47.0, 36.8, 29.3, 29.2, 25.3, 22.3, 16.9

**IR** (cm<sup>-1</sup>): 2951, 1750, 1707, 1645, 1447, 1349, 1310, 1264, 1173, 1092, 1028, 941, 918, 891

**ESI-HRMS** (m/z):  $[\text{M}+\text{H}]^+$  calc'd for C<sub>13</sub>H<sub>17</sub>O<sub>3</sub><sup>+</sup>: 221.2681; found: 221.1178

**Optical Rotation**:  $[\alpha]_{\text{D}}^{20} = +90.4^\circ$  ( $c$  0.2, CHCl<sub>3</sub>)

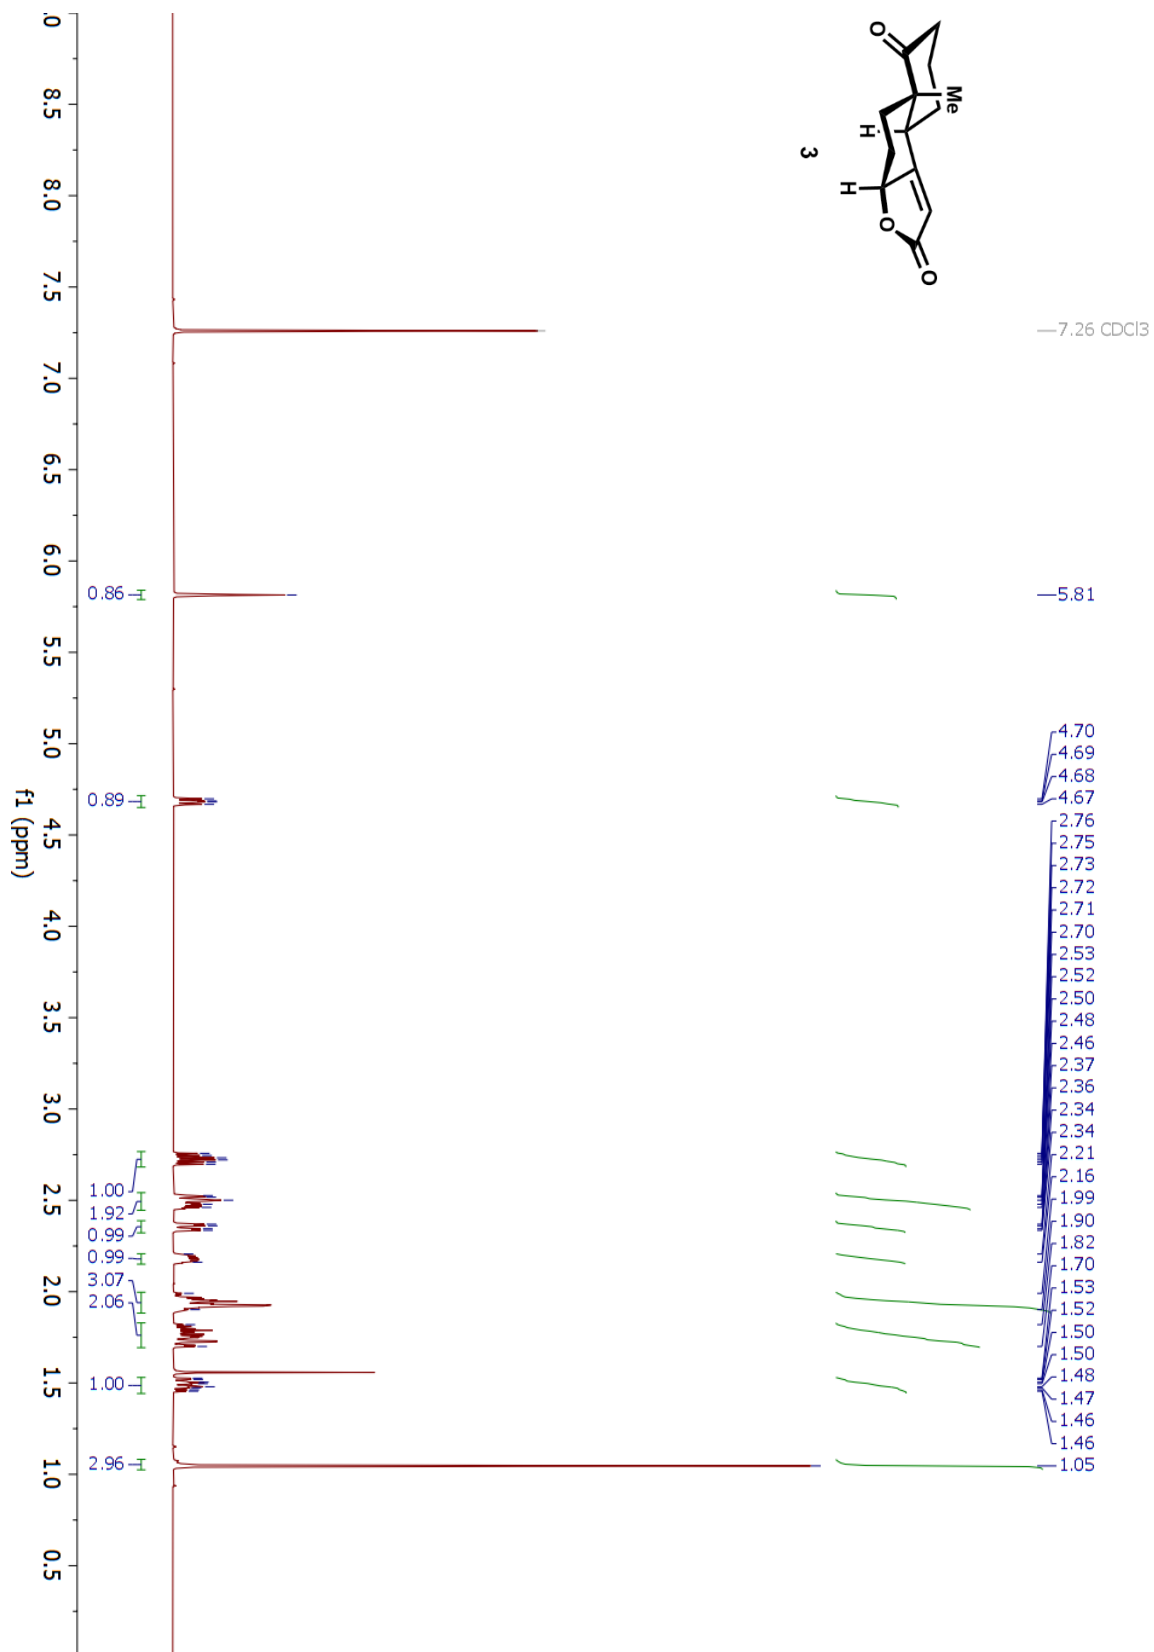



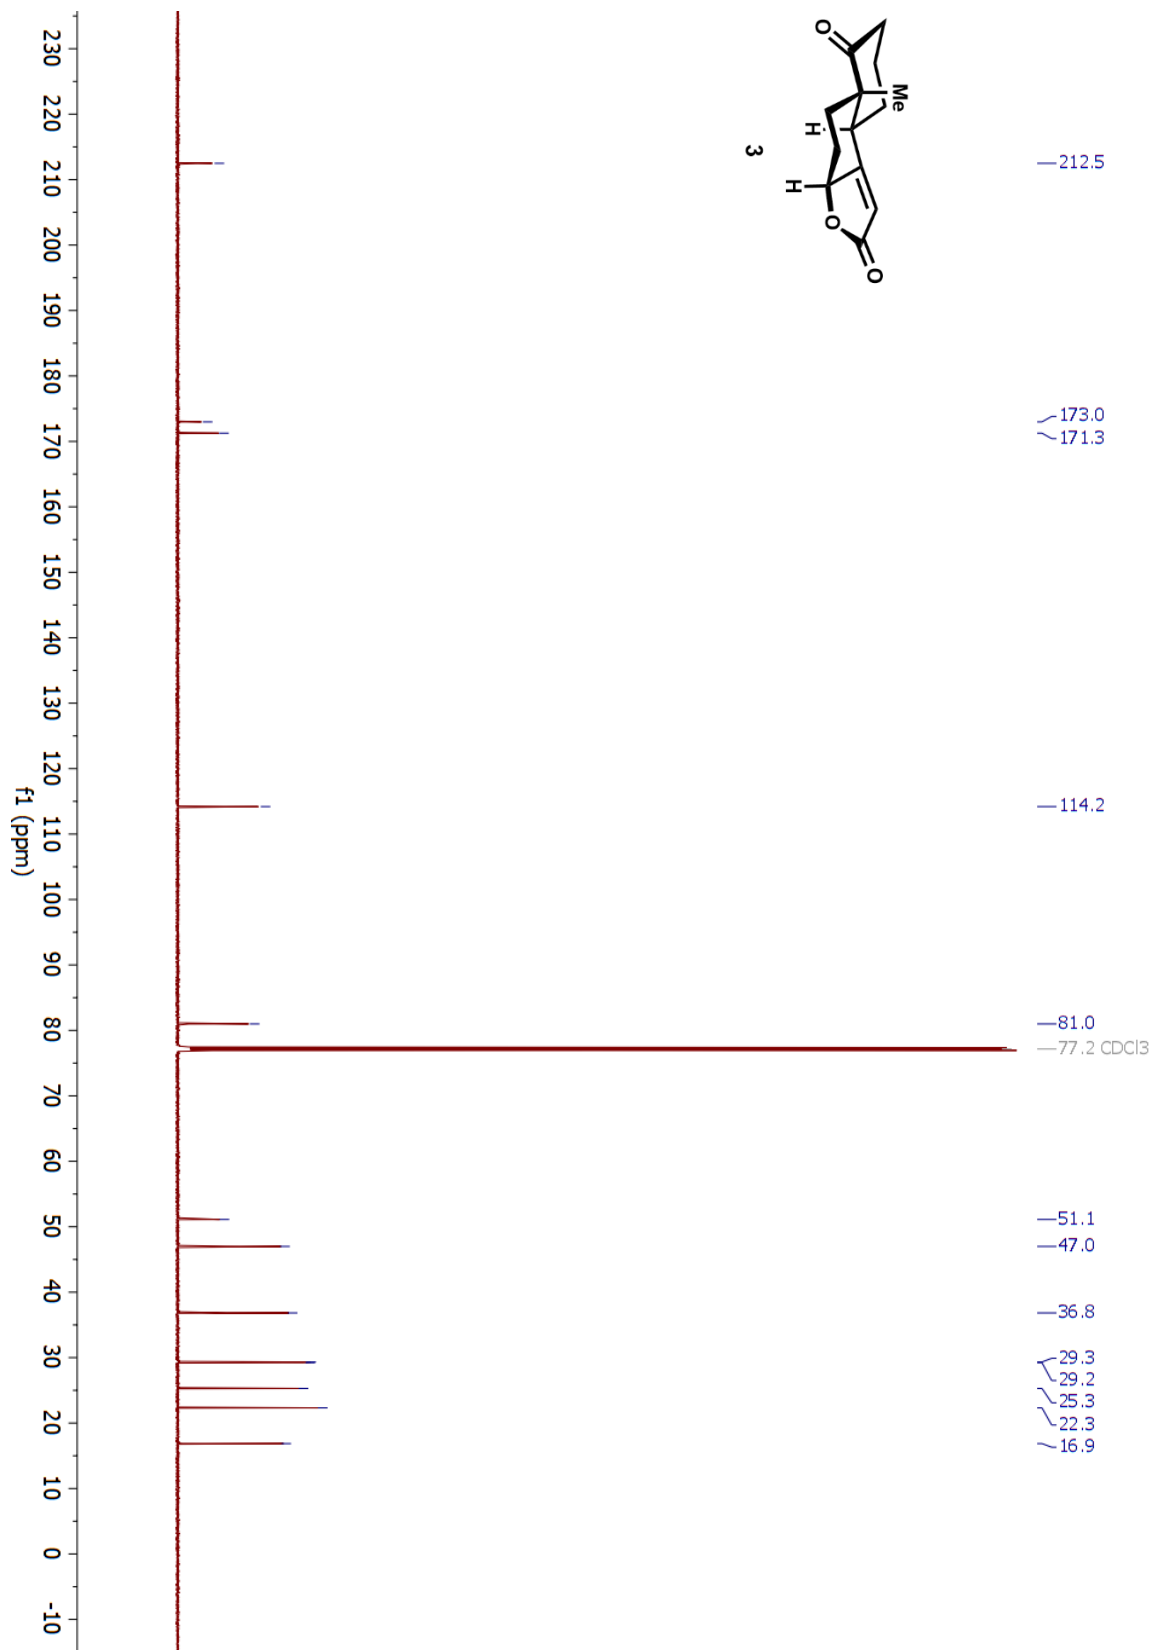

## Synthesis of Indole 9:

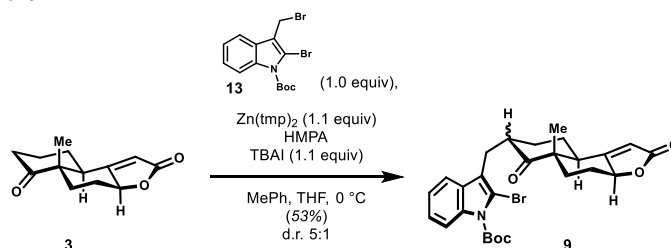

A flame-dried, 25 mL round-bottomed flask equipped with a magnetic stir bar was charged with **3** (303 mg, 1.376 mmol, 1.0 equiv), sealed with a rubber septum, evacuated and backfilled with nitrogen three times, and placed under a nitrogen atmosphere. **3** was dissolved in anhydrous toluene (7.0 mL, 0.2 M) and HMPA (1.4 mL, 0.98 M) and the resulting solution was cooled to 0 °C by transferring the reaction apparatus to an ice-water bath. After stirring for 5 minutes, a solution of Zn(TMP)<sub>2</sub> (0.5 M in toluene, 3.0 mL 1.51 mmol, 1.1 equiv) was added to the reaction flask in a dropwise fashion over 5 minutes. The resulting enolate was stirred at 0 °C for 1 hour while another flask was prepared.

A flame-dried, 50 mL round-bottomed flask equipped with a magnetic stir bar was charged with **13**<sup>2</sup> (535 mg, 1.375 mmol, 1.0 equiv), sealed with a rubber septum, evacuated and backfilled with nitrogen three times, and placed under an atmosphere of nitrogen. The solid was dissolved in anhydrous THF (7.0 mL, 0.2 M) and HMPA (0.7 mL, 2.0M). The resulting solution was cooled to 0 °C by transferring the reaction apparatus to an ice-water bath and was left to stir at that temperature for 5 minutes, after which TBAI (559 mg, 1.513 mmol, 1.1 equiv) was added to the reaction flask as a solid in a single portion. The first reaction flask containing the enolate solution of **3** was removed from the cooling bath and its contents were slowly cannulated into the flask containing the solution of **13** in a dropwise fashion over 15 minutes. Upon addition of the enolate solution, the colorless reaction mixture became dark orange in color. The resulting reaction mixture was allowed to stir at 0 °C for 1 hour.

After this time, the reaction was quenched by pouring into sat. aq. NaHCO<sub>3</sub> (100 mL). The layers were separated and the aqueous layer was extracted with Et<sub>2</sub>O (3 × 100 mL). The combined organic layers were washed with brine (500 mL), dried over anhydrous sodium sulfate, filtered, and concentrated under reduced pressure by rotary evaporation to provide a crude orange foam. Purification by flash column chromatography on silica gel (0 to 40% Et<sub>2</sub>O in hexanes) afforded **9** (383 mg, 53%, d.r. 5:1) as a white foam. Additionally, **3** was recovered (34 mg, 11%).

**R<sub>f</sub>**: 0.51 (5% Et<sub>2</sub>O in DCM)

**<sup>1</sup>H NMR** for **9-major isomer** (600 MHz, CDCl<sub>3</sub>): δ 8.08 (d, *J* = 8.4 Hz, 1H), 7.41 (d, *J* = 7.4 Hz, 1H), 7.29 (at, *J* = 7.9 Hz, 1H), 7.23 (at, *J* = 7.4 Hz, 1H), 5.76 (s, 1H), 4.68 (dd, *J* = 10.4, 7.9 Hz, 1H), 3.27 (dd, *J* = 14.6, 4.0 Hz, 1H), 3.20–3.15 (m, 1H), 2.68 (dd, *J* = 14.6, 9.8 Hz, 1H), 2.52–2.48 (m, 2H), 2.12–2.08 (m, 1H), 1.88–1.80 (m, 3H), 1.70 (s, 9H), 1.36–1.49 (m, 3H), 1.06 (s, 3H)

**<sup>13</sup>C NMR** for **9-major isomer** (151 MHz, CDCl<sub>3</sub>): δ 212.9, 172.9, 171.0, 149.2, 136.6, 128.9, 124.8, 123.1, 121.1, 118.2, 115.6, 114.1, 109.9, 85.2, 80.9, 51.3, 47.9, 44.6, 32.3, 29.6, 29.2, 28.4, 25.1, 22.5, 17.0

**IR** ( $\text{cm}^{-1}$ ): 2943, 1746, 1708, 1646, 1448, 1394, 1370, 1351, 1313, 1254, 1210, 1155, 1101, 1016, 974, 912, 843, 732

**ESI-HRMS** ( $m/z$ ):  $[\text{M}+\text{H}]^+$  calc'd for  $\text{C}_{27}\text{H}_{31}\text{BrNO}_5^+$ : 528.1386; found: 528.1385

**Optical Rotation:**  $[\alpha]_{\text{D}}^{20} = +53.4^\circ$  ( $c$  0.9,  $\text{CHCl}_3$ )

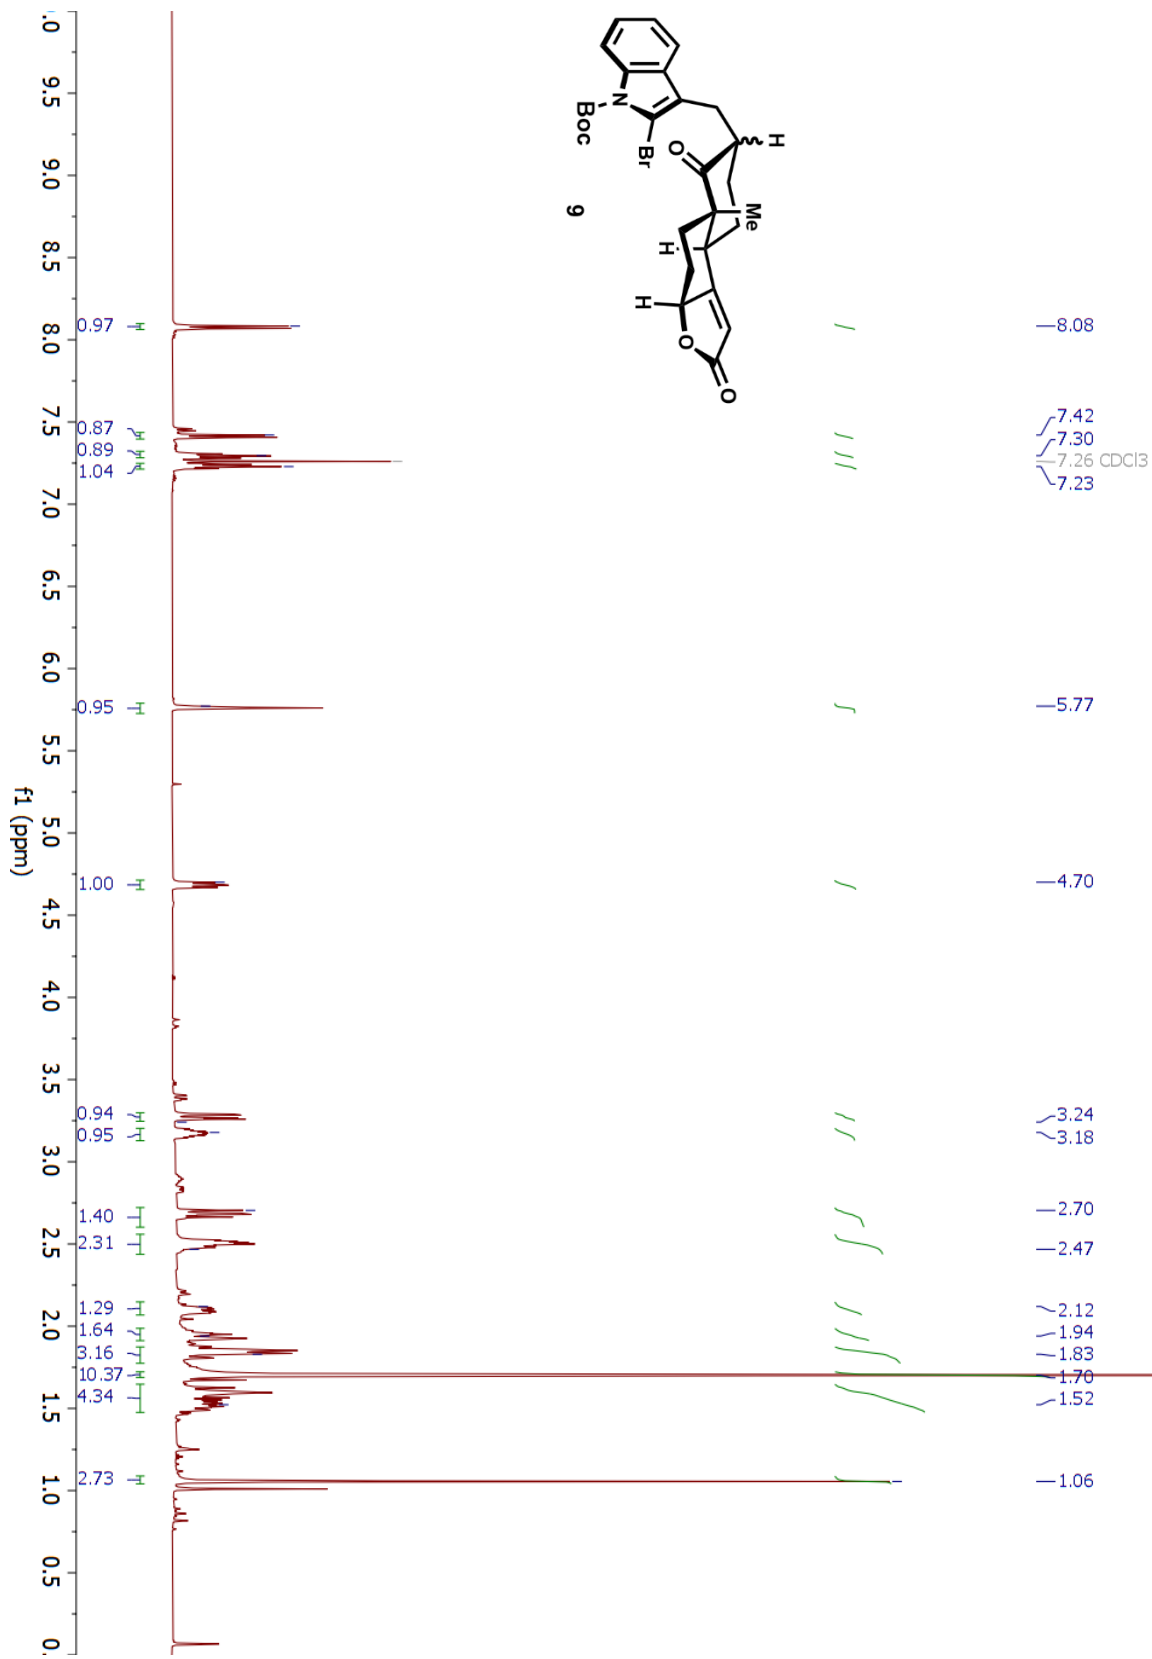

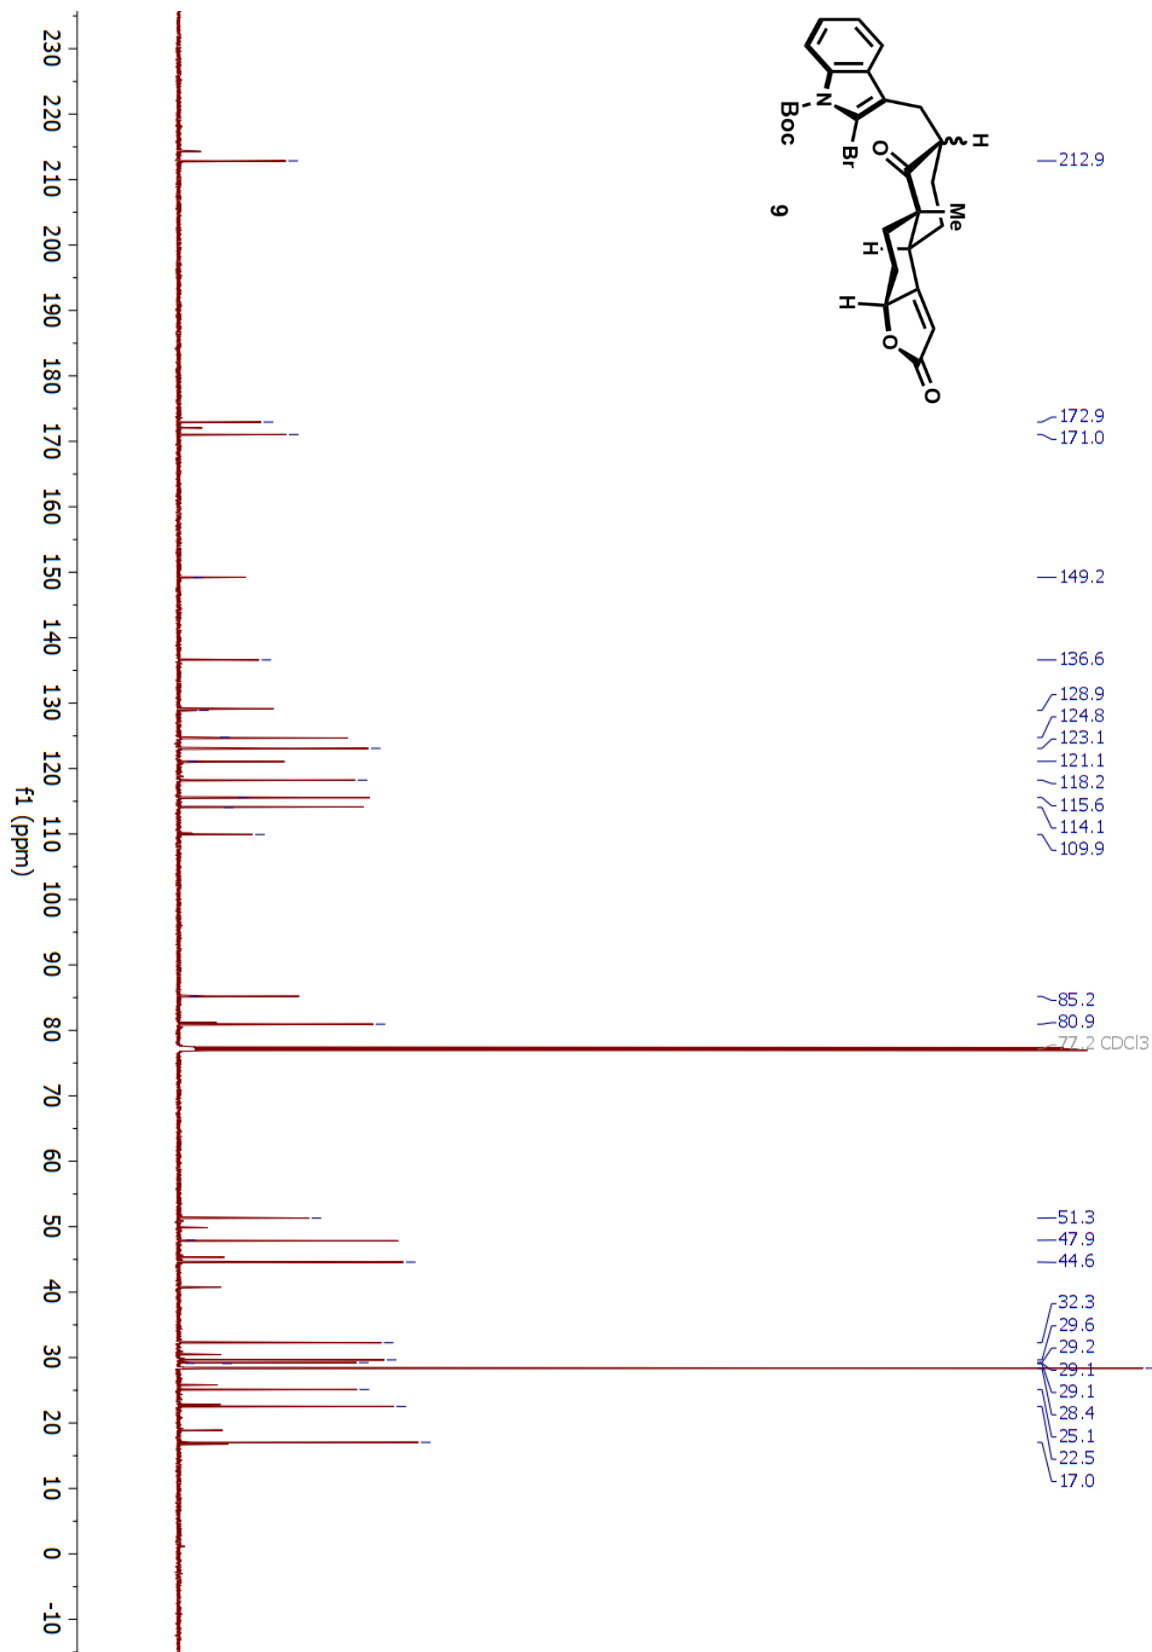

## Synthesis of Indole 10:

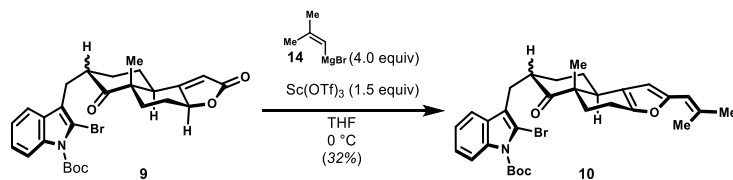

A flame-dried 10 mL microwave vial was equipped with a magnetic stir bar and charged with **9** (100 mg, 0.189 mmol, 1.0 equiv), after which the apparatus was sealed with a rubber septum, evacuated and backfilled with nitrogen three times, and placed under a nitrogen atmosphere. The compound was then dissolved in anhydrous THF (1.9 mL 0.10 M), and the resulting solution was cooled to  $0^\circ\text{C}$  by transferring the reaction apparatus to an ice-water bath. After 10 minutes of stirring,  $\text{Sc}(\text{OTf})_3$  (140 mg, 0.284 mmol, 1.5 equiv) was added to the flask in a single portion as a solid. The mixture was left to stir for 15 minutes at  $0^\circ\text{C}$ . A solution of **14** (0.5 M in THF, 1.5 mL, 0.757 mmol, 4.0 equiv) was syringed into the reaction vial over the course of 5 minutes. After full consumption of the starting material was observed by TLC, the reaction was left stirring for another 15 minutes.

The reaction mixture was diluted with DCM and quenched by pouring sat. aq.  $\text{NH}_4\text{Cl}$  (5 mL) to the flask. The layers were separated and the aqueous layer was extracted with DCM ( $3 \times 5$  mL). The combined organic layers were washed with brine (15 mL) and dried over anhydrous  $\text{Na}_2\text{SO}_4$ . The solution was then filtered and concentrated by rotary evaporation under reduced pressure to afford an orange solid.

The orange solid was transferred to another 10 mL microwave vial redissolved in DCM (1.9 mL, 0.10 M) at room temperature, after which  $p\text{TsoH} \cdot \text{H}_2\text{O}$  (18 mg, 0.095 mmol, 0.5 equiv) was added to the reaction mixture as a solid in a single portion. The reaction was left to stir at room temperature for 1 hour, before it was quenched by pouring into sat. aq.  $\text{NaHCO}_3$  (5 mL). The layers were separated and the aqueous layer was extracted with DCM ( $3 \times 5$  mL). The combined organic layers were washed with brine (15 mL), dried over anhydrous sodium sulfate, filtered, concentrated by rotary evaporation under reduced pressure to afford crude **10** as an orange foam. Purification by flash chromatography (0 to 2%  $\text{Et}_2\text{O}$  in hexanes) afforded **10** in the form of a white solid (34 mg, 32%) as an inconsequential mixture of 3:1 diastereomers.

### **10** – major diastereomer:

**R<sub>f</sub>**: 0.39 (20%  $\text{Et}_2\text{O}$  in hexanes)

**<sup>1</sup>H NMR** (500 MHz,  $\text{CD}_2\text{Cl}_2$ ):  $\delta$  8.07 (d,  $J = 9.0$  Hz, 1H), 7.50 (d,  $J = 7.5$  Hz, 1H), 7.29 (t,  $J = 7.5$  Hz, 1H), 7.24 (t,  $J = 7.9$  Hz, 1H), 6.01 (s, 1H), 5.98 (s, 1H), 3.30–3.20 (m, 2H), 2.74–2.55 (m, 4H), 2.11–2.05 (m, 2H), 1.99–1.92 (m, 4H), 1.91–1.81 (m, 4H), 1.74–1.67 (m, 10H), 1.62–1.55 (m, 1H), 1.08 (s, 3H)

**<sup>13</sup>C NMR** (125 MHz,  $\text{CD}_2\text{Cl}_2$ ):  $\delta$  215.4, 153.3, 149.9, 147.7, 137.4, 134.5, 130.0, 125.1, 123.5, 122.4, 120.6, 119.2, 116.0, 115.2, 107.1, 85.7, 49.0, 45.3, 44.4, 34.1, 30.5, 28.8, 27.5, 26.1, 24.8, 20.8, 20.7, 16.0

**IR** ( $\text{cm}^{-1}$ ): 1744, 1444, 1369, 1307, 1164, 1108

**Optical Rotation:**  $[\alpha]_{\text{D}}^{25} = -7.4^{\circ}$  ( $c$  0.3,  $\text{CHCl}_3$ )

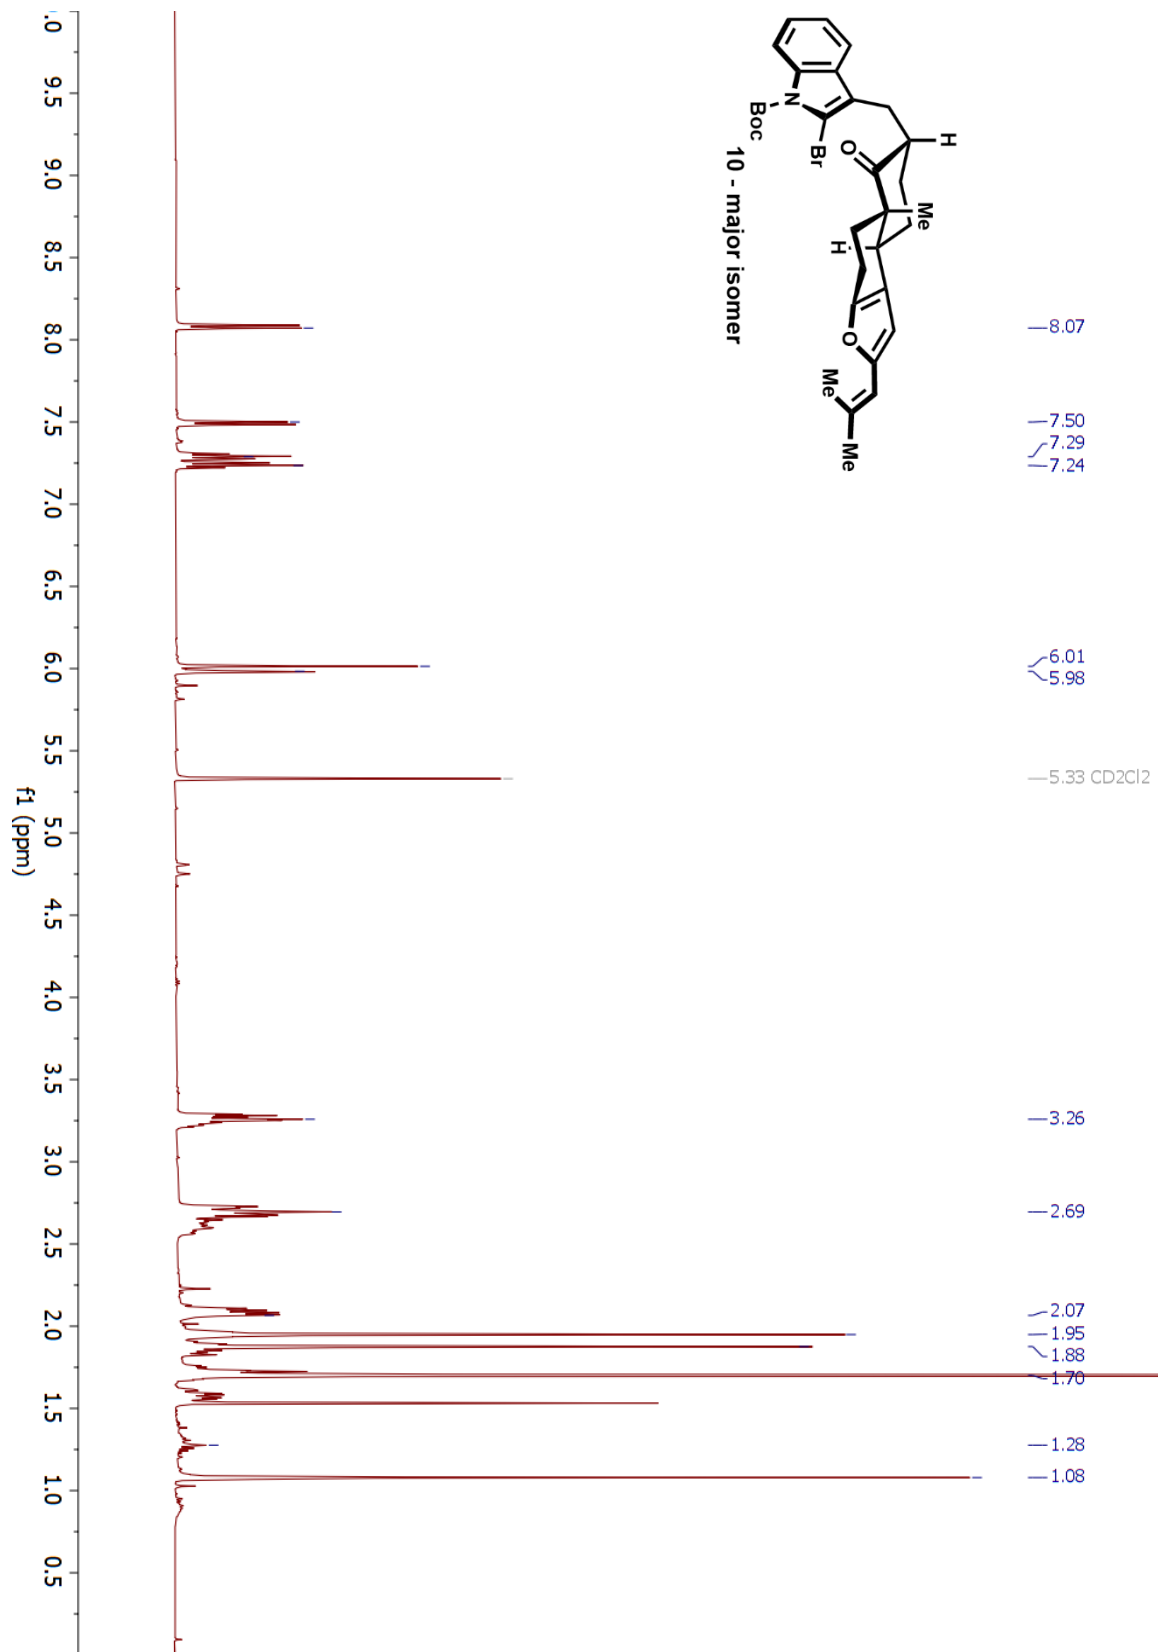



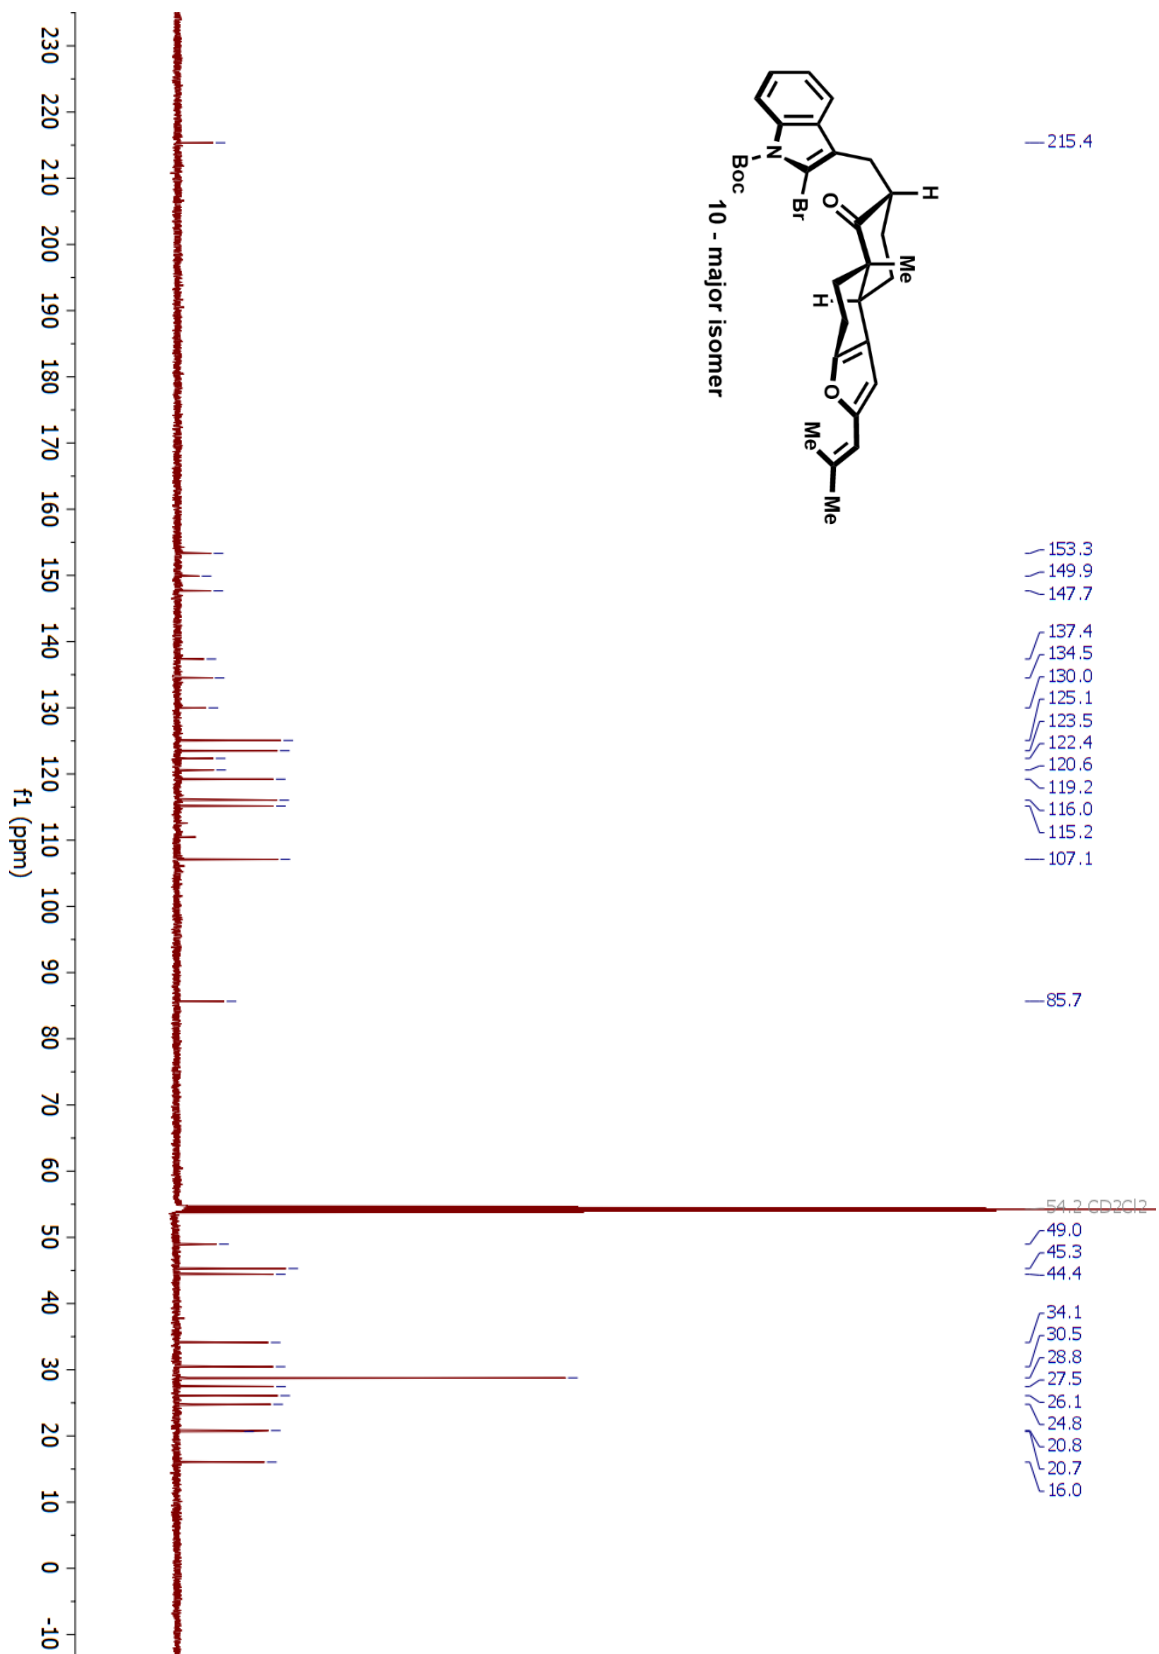

## Synthesis of Olefin **2**:

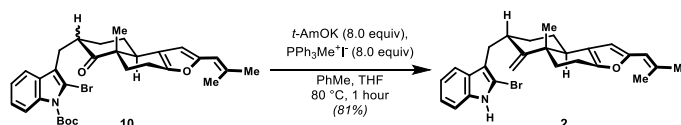

A flame-dried 10 mL microwave reaction vial equipped with a stir bar was charged with methyltriphenylphosphonium iodide (771 mg, 1.906 mmol, 8.0 equiv), sealed with a PTFE crimp cap, evacuated and backfilled with nitrogen three times, and placed under a nitrogen atmosphere. The vial was transferred to an oil bath preheated to 80 °C, and heated at that temperature for 5 minutes. Potassium tert-pentoxide (1.7 M in toluene, 1.1 mL, 8.0 equiv) was added to the solids in a single portion via syringe. Following this, toluene (0.27 mL) was syringed into the vial, and the resulting mixture was left to stir vigorously for 15 minutes.

Another flame-dried 10 mL microwave reaction vial was charged with **10** (135 mg, 0.238 mmol, 1.0 equiv). The vial was sealed with a rubber septum, evacuated and backfilled with nitrogen three times, and placed under a nitrogen atmosphere. **10** was dissolved in anhydrous toluene (0.32 mL, 0.75M) and the resulting solution was syringed into the solution of ylide at 80 °C. The transfer was quantitated by rinsing with toluene (2 × 0.32 mL).

After stirring at 80 °C for 1 hour, the reaction vial was removed from the oil bath and allowed to cool to the room temperature. The reaction mixture was diluted with DCM (30 mL) and quenched by pouring into sat. aq. NH<sub>4</sub>Cl (50 mL). The layers were separated and the aqueous layer was extracted with DCM (3 × 50 mL). The combined organic layers were washed with brine (50 mL), dried over anhydrous sodium sulfate, filtered, and concentrated under reduced pressure by rotary evaporation to provide a crude orange foam. Purification by flash column chromatography on silica gel (0 to 2% Et<sub>2</sub>O in hexanes) afforded **2** (90 mg, 81%) as a white foam.

**R<sub>f</sub>**: 0.36 (20% Et<sub>2</sub>O in hexanes)

**<sup>1</sup>H NMR** (600 MHz, CD<sub>2</sub>Cl<sub>2</sub>): δ 8.15 (bs, 1H), 7.49 (d, *J* = 8.1 Hz, 1H), 7.32 (d, *J* = 8.0 Hz, 1H), 7.17 (t, *J* = 8.1 Hz, 1H), 7.10 (t, *J* = 6.9 Hz, 1H), 5.96 (ov, 1H), 5.96 (ov, 1H), 4.97 (s, 1H), 4.94 (s, 1H), 3.10 (dd, *J* = 13.2, 2.9 Hz, 1H), 2.87 (at, *J* = 10.1 Hz, 1H), 2.75–2.64 (m, 3H), 2.36 (d, *J* = 12.2 Hz, 1H), 2.02–1.98 (m, 1H), 1.93 (s, 3H), 1.91–1.79 (m, 6H), 1.40 (dddd, *J* = 10.9, 16.7, 13.3, 3.6 Hz, 1H), 1.21–1.12 (m, 1H), 0.94 (s, 3H)

**<sup>13</sup>C NMR** (600 MHz, CD<sub>2</sub>Cl<sub>2</sub>): δ 160.7, 152.9, 147.8, 137.0, 133.9, 128.9, 122.9, 122.2, 120.7, 118.1, 115.5, 115.3, 111.2, 109.5, 107.1, 103.0, 44.5, 40.7, 38.8, 34.5, 34.2, 29.4, 27.4, 25.9, 21.6, 20.6, 17.1

**IR** (cm<sup>-1</sup>): 3397, 2924, 2439, 1371, 1213, 737

**Optical Rotation**: [α]<sub>D</sub><sup>20</sup> = -58.0° (*c* 0.12, CHCl<sub>3</sub>)

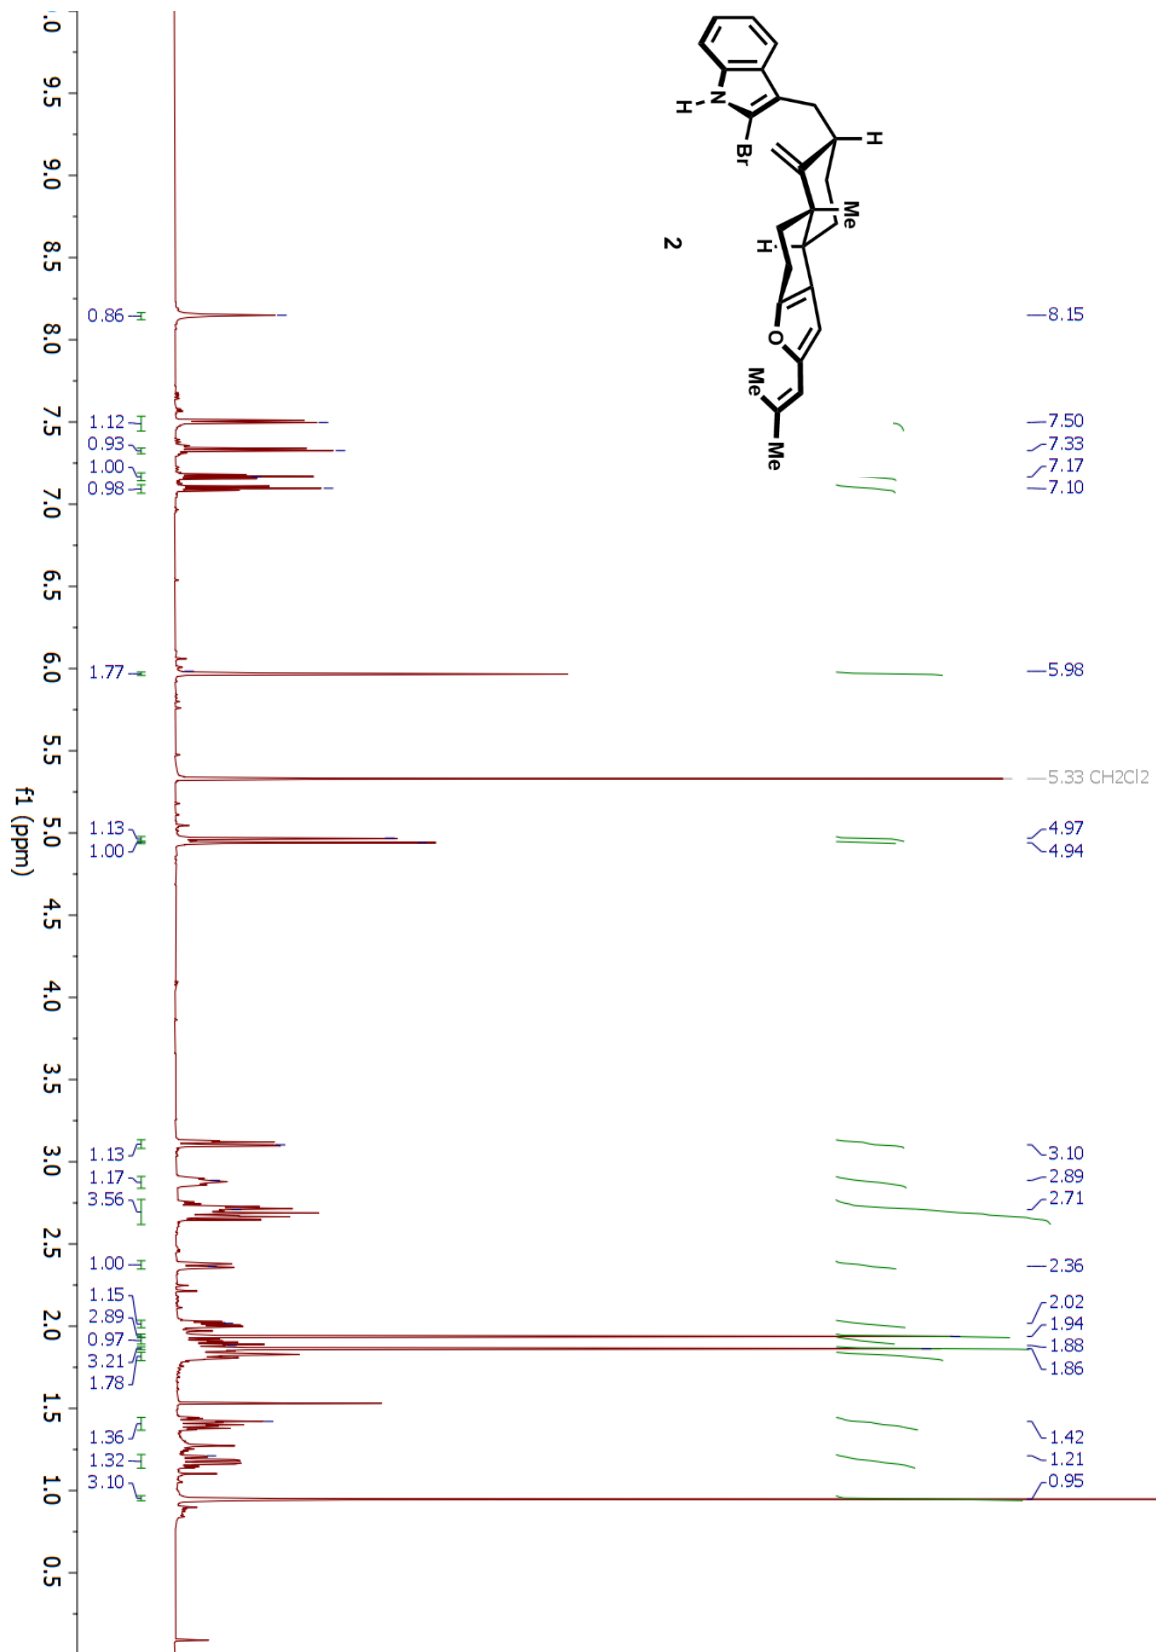

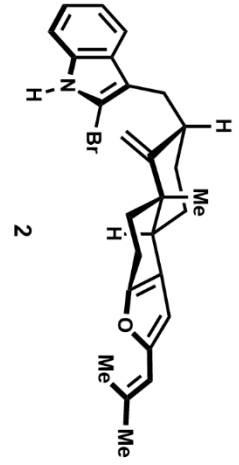

- 160.7
- 152.9
- 147.8
- ~ 137.0
- ~ 133.9
- ~ 128.9
- ~ 122.9
- ~ 122.2
- ~ 120.7
- ~ 119.1
- ~ 115.5
- ~ 115.3
- ~ 111.2
- ~ 109.5
- ~ 107.1
- ~ 103.0

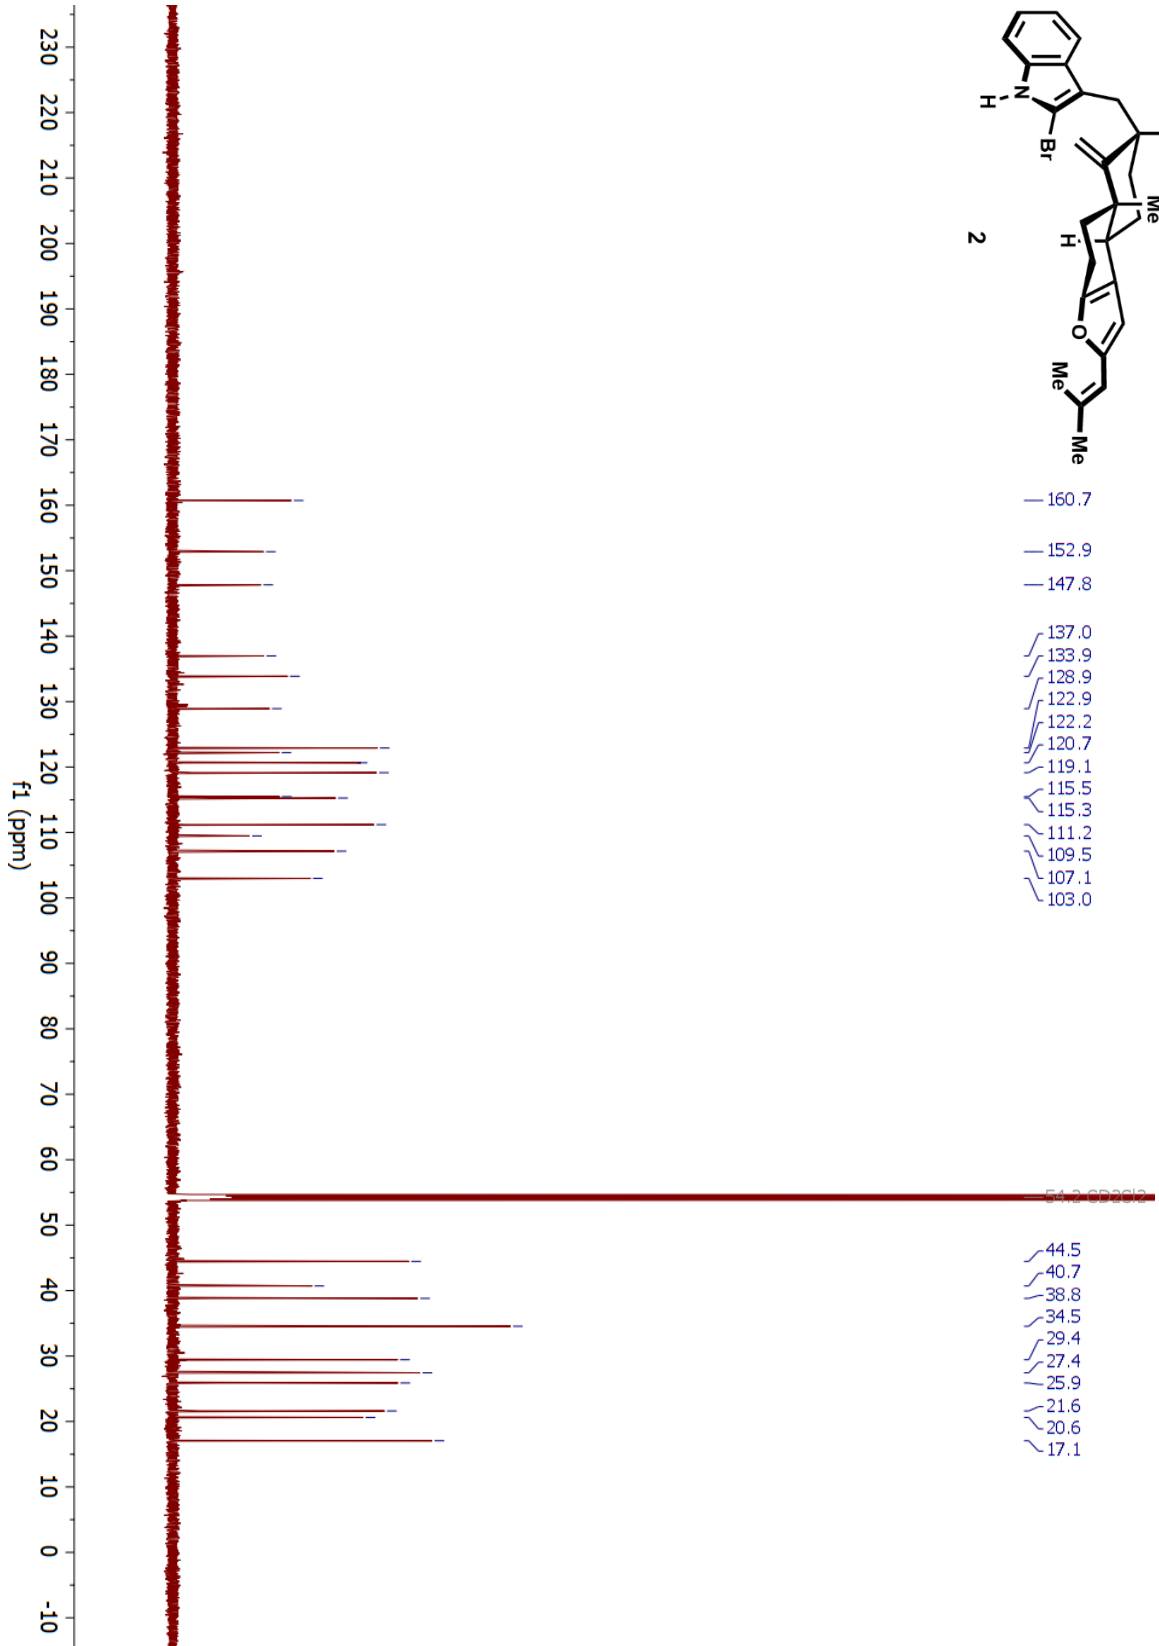

## General Experimental Procedure for Ligand Optimization to Access Carbazole 15:

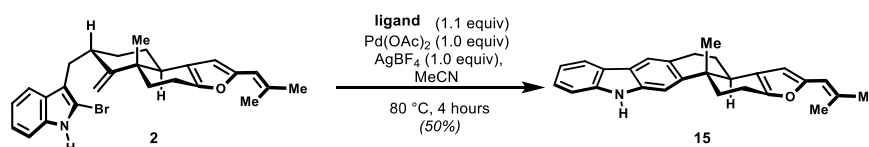

A flame-dried, 5 mL microwave reaction vial equipped with a magnetic stir bar was charged with **2** (5.0 mg, 0.011 mmol, 1.0 equiv), Pd(OAc)<sub>2</sub> (2.4 mg, 0.011 mmol, 1.0 equiv), and the ligand (0.012 mmol, 1.1 equiv), sealed with a PTFE crimp cap, evacuated and backfilled with nitrogen three times, and placed under an argon atmosphere. The contents of the reaction flask were dissolved in anhydrous acetonitrile (0.27 mL, 0.04 M). Following this, a solution of AgBF<sub>4</sub> (2.1 mg, 0.011 mmol, 1.0 equiv) in anhydrous acetonitrile (0.014 mL, 0.78 M) was syringed into the reaction vial. The resulting solution was warmed to 80 °C by transferring the reaction apparatus to a preheated oil bath, after which the reaction mixture was allowed to stir at 80 °C for 4 hours.

After this time, the reaction flask was removed from the oil bath and allowed to cool. The reaction mixture was diluted with EtOAc (3 mL) and filtered through a pad of Celite<sup>®</sup>. The resulting filtrate was concentrated under reduced pressure by rotary evaporation. The crude mixture was purified by thin layer chromatography silica gel.

## Synthesis of Carbazole 15:

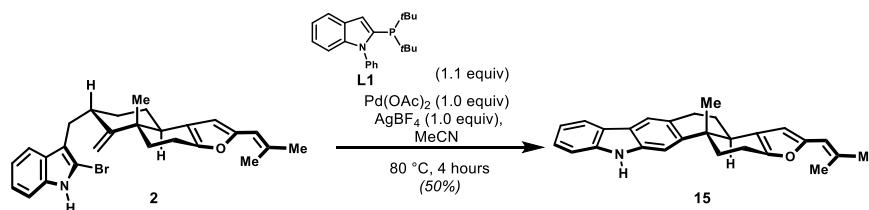

A flame-dried, 20 mL microwave reaction vial equipped with a magnetic stir bar was charged with **2** (72 mg, 0.155 mmol, 1.0 equiv), Pd(OAc)<sub>2</sub> (35 mg, 0.155 mmol, 1 equiv), and **L1** (58 mg, 0.171 mmol, 1.1 equiv), sealed with a PTFE crimp cap, evacuated and backfilled with nitrogen three times, and placed under an argon atmosphere. The contents of the reaction flask were dissolved in anhydrous acetonitrile (3.9 mL, 0.04 M). Following this, a solution of AgBF<sub>4</sub> (30mg, 0.155 mmol 1.0 equiv) in anhydrous acetonitrile (0.2 mL, 0.78M) was syringed into the reaction vial. The resulting solution was warmed to 80 °C by transferring the reaction apparatus to a preheated oil bath, after which the reaction mixture was allowed to stir at 80 °C for 4 hours.

After this time, the reaction flask was removed from the oil bath and allowed to cool. The reaction mixture was filtered through a pad of Celite<sup>®</sup> and the resulting filtrate was concentrated under reduced pressure by rotary evaporation to provide a crude red solid. Purification by flash column chromatography on silica gel (0 to 2% Et<sub>2</sub>O in hexanes) afforded **15** (30 mg, 50%) as a yellow foam.

**R<sub>f</sub>**: 0.35 (20% Et<sub>2</sub>O in hexanes)

**<sup>1</sup>H NMR** (600 MHz, CD<sub>2</sub>Cl<sub>2</sub>): δ 8.06 (bs, 1H), 8.00 (d, *J* = 6.6 Hz, 1H), 7.84 (s, 1H), 7.48 (s, 1H), 7.43 (d, *J* = 8.3 Hz, 1H), 7.38 (at, *J* = 6.9 Hz, 1H), 7.19 (at, *J* = 7.5 Hz, 1H), 6.16 (s, 1H), 6.04 (s, 1H), 3.31–3.22 (m, 2H), 2.89–2.82 (m, 3H), 2.69–2.65 (m, 1H), 2.30–2.24 (m, 1H), 2.01 (s, 3H), 1.99–1.92 (m, 2H), 1.91 (s, 3H), 1.08 (s, 3H)

**<sup>13</sup>C NMR** (150 MHz, CD<sub>2</sub>Cl<sub>2</sub>): δ 153.0, 148.2, 146.2, 140.9, 139.2, 134.1, 127.9, 126.2, 123.8, 122.3, 122.2, 121.3, 120.7, 119.9, 115.3, 111.3, 107.4, 106.7, 40.1, 38.3, 34.7, 29.5, 27.5, 22.9, 22.1, 21.7, 20.7

**IR** (cm<sup>-1</sup>): 3394, 2922, 2856, 1441, 1366, 1206, 746

**ESI-HRMS** (*m/z*): [M]<sup>+</sup> calc'd for C<sub>27</sub>H<sub>28</sub>NO<sup>+</sup>:381.2087; found: 381.2083

**Optical Rotation**: [α]<sub>D</sub><sup>20</sup> = -29.7° (*c* 0.23, CHCl<sub>3</sub>)

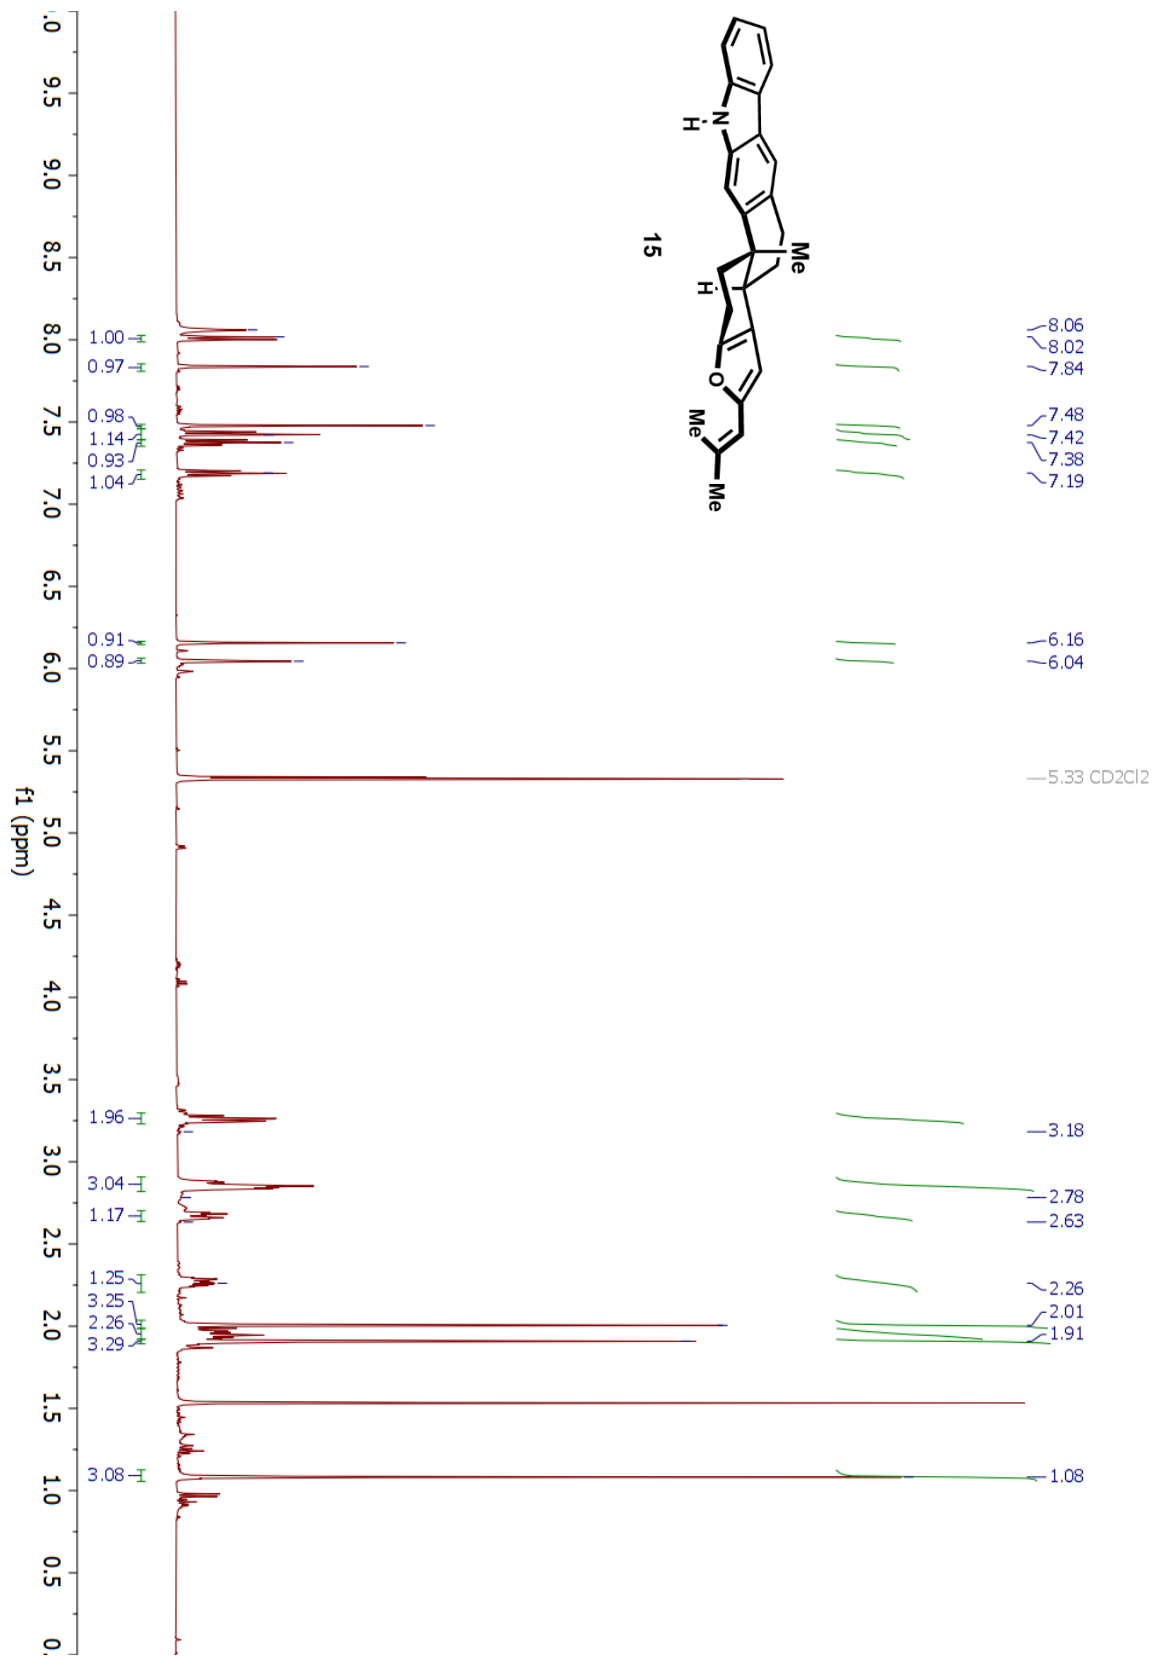

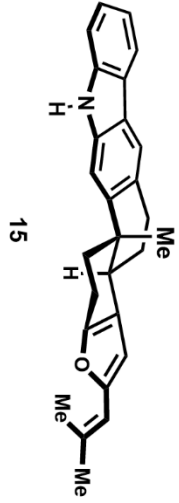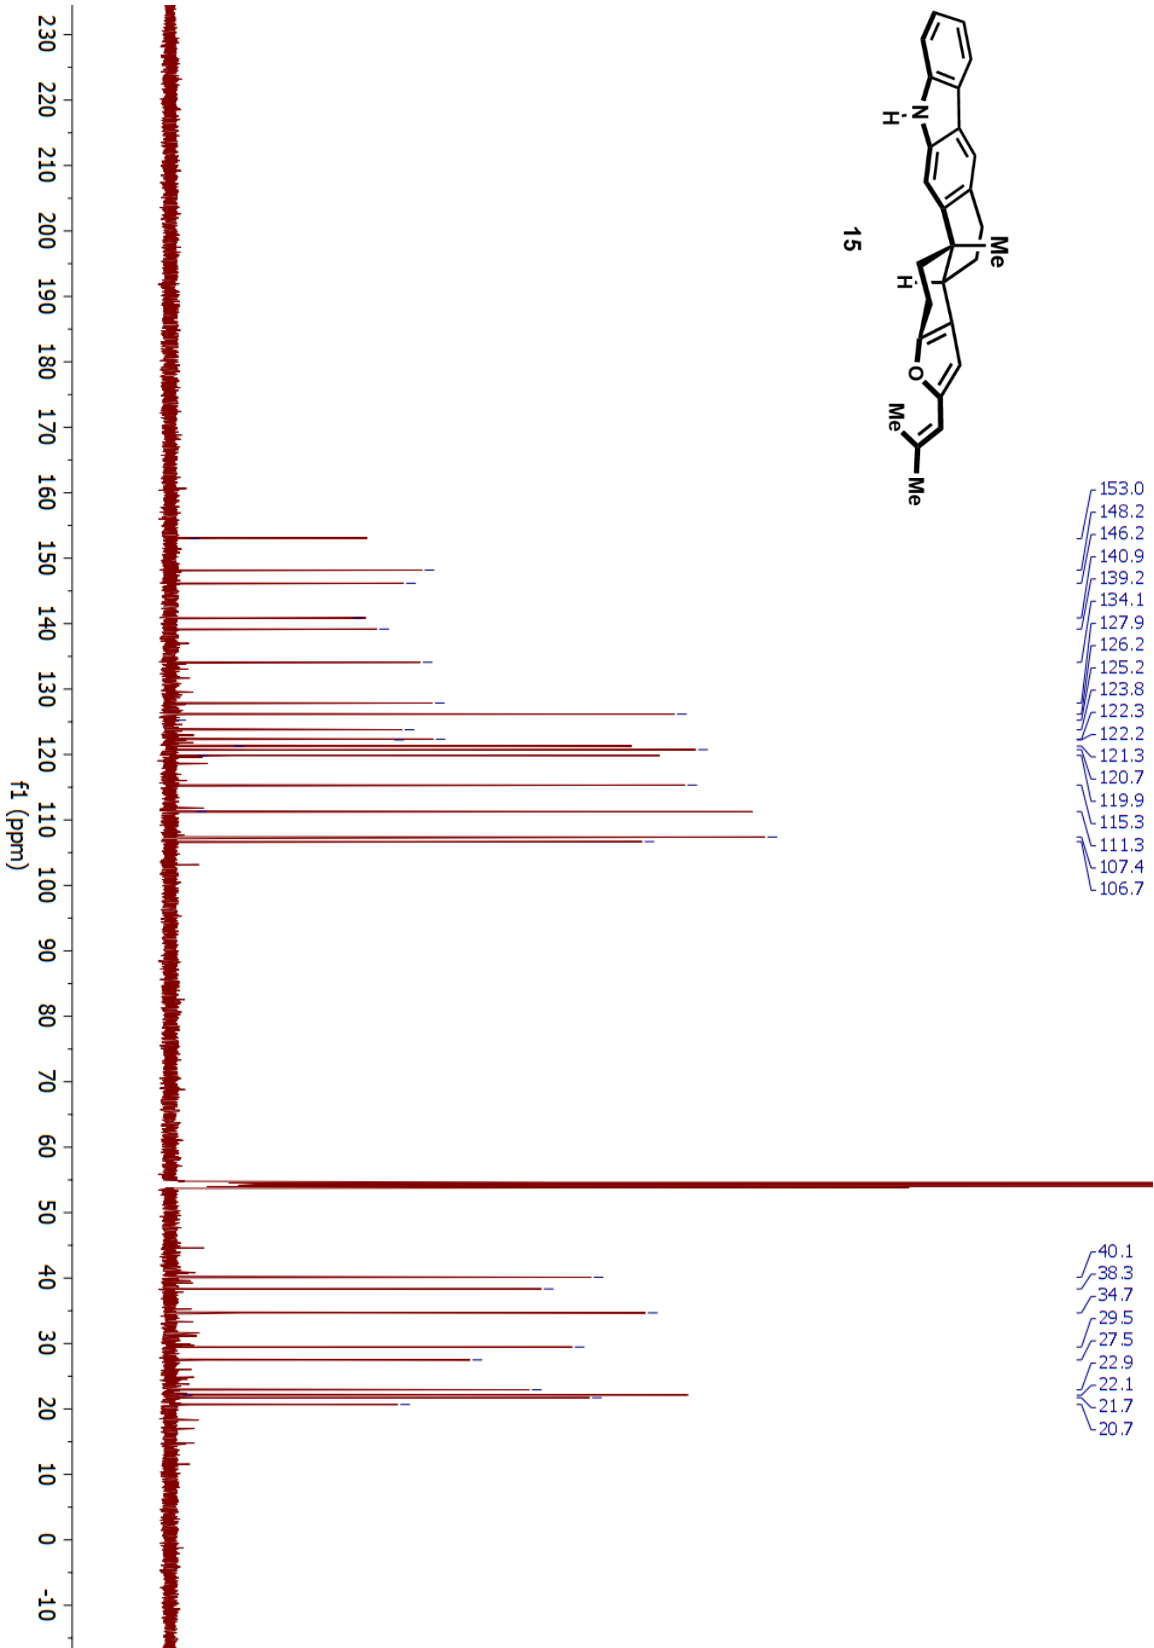



## Synthesis of Shearilicine (1):

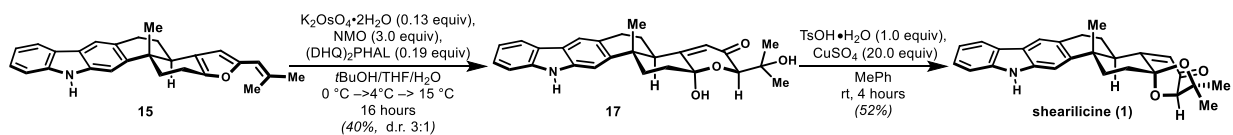

A 10 mL microwave reaction vial equipped with a magnetic stir bar was charged with **15** (25 mg 0.066 mmol, 1.0 equiv),  $(DHQ)_2PHAL$  (10 mg, 0.012 mmol, 0.19 equiv), and *N*-methylmorpholine *N*-oxide (NMO) (23 mg, 0.197 mmol, 3.0 equiv), after which the mixture was dissolved in a 1:1:1 mixture of *tert*-butanol, THF, and  $H_2O$  (2.82 mL, 0.023 M). The resulting solution was cooled to  $0\text{ }^\circ\text{C}$  by transferring the reaction apparatus to an ice-water bath. After 10 minutes of stirring,  $K_2OsO_4 \cdot 2H_2O$  (3 mg, 0.008 mmol, 0.13 equiv) was added to the vial in a single portion. The reaction vial was sealed with a rubber septum and moved to a  $4\text{ }^\circ\text{C}$  water bath. The reaction mixture was left to stir overnight in this water bath, which gradually warmed up to  $15\text{ }^\circ\text{C}$ .

After this time,  $Na_2SO_3$  (132 mg, 1.048 mmol, 16.0 equiv) was added to the vial as a solid in a single portion. The mixture was left to stir for 30 minutes, after which it was poured into sat. aq.  $NaHCO_3$  (3 mL) and the layers were separated. The aqueous layer was extracted with EtOAc ( $3 \times 3\text{ mL}$ ). The combined organic layers were washed with brine (3 mL), dried over anhydrous sodium sulfate, filtered, and concentrated under reduced pressure by rotary evaporation to provide a crude brown solid. Thin layer chromatography silica gel (EtOAc/hexanes = 4/1) afforded **17** as a white solid (10 mg, 40%, d.r. 3:1).

The purified diol **17** (10 mg, 0.023 mmol, 1.0 equiv) was transferred to a flame-dried 10 mL microwave reaction vial, evacuated and backfilled with nitrogen three times, and placed under a nitrogen atmosphere, after which the compound was dissolved in anhydrous toluene (1.2 mL, 0.02 M).  $CuSO_4$  (74 mg, 0.464 mmol, 20.0 equiv) and *p*TsOH· $H_2O$  (4 mg, 0.023, 1.0 equiv) were added to the vial in single portions as solids. The resulting mixture was left to stir at room temperature for 2 hours, before the mixture was diluted with EtOAc (1 mL), filtered through a pad of silica gel, and quenched by pouring the filtrate into sat. aq.  $NaHCO_3$  (1 mL). The layers were separated and the aqueous layer was extracted with EtOAc ( $3 \times 1\text{ mL}$ ). The combined organic layers were washed with brine (1 mL), dried over anhydrous sodium sulfate, filtered, and concentrated under reduced pressure by rotary evaporation. The crude residue was purified by thin layer chromatography silica gel (Et<sub>2</sub>O/DCM/hexanes = 20%/20%/60%) to afford shearilicine **1** as a white solid (5 mg, 52%).

**<sup>1</sup>H NMR** (600 MHz,  $CDCl_3$ ):  $\delta$  8.00 (d,  $J = 7.6\text{ Hz}$ , 1H), 7.91 (br s, 1H), 7.75 (s, 1H), 7.38 (ov, 1H), 7.38 (ov, 1H), 7.27 (s, 1H), 7.19 (m, 1H), 5.93 (br s, 1H), 4.35 (d,  $J = 1.1\text{ Hz}$ , 1H), 3.15 (m, 2H), 3.04 (dt,  $J = 12.1, 2.6\text{ Hz}$ , 1H), 2.53 (m, 2H), 2.25 (ddd,  $J = 13.9, 11.3, 9.6\text{ Hz}$ , 1H), 2.18 (m, 1H), 2.04 (br dd,  $J = 13.9, 7.4\text{ Hz}$ , 1H), 1.85 (qd,  $J = 12.4, 6.1\text{ Hz}$ , 1H), 1.47 (s, 3H), 1.39 (s, 3H), 1.26 (s, 3H)

**<sup>13</sup>C NMR** (150 MHz,  $CDCl_3$ ): 196.3, 170.9, 147.5, 140.4, 139.0, 125.9, 125.1, 123.1, 122.1, 120.4, 120.4, 119.9, 119.5, 110.6, 108.2, 104.1, 88.3, 78.4, 43.5, 36.1, 34.8, 30.7, 29.8, 29.1, 28.4, 23.4, 19.8

**IR** ( $\text{cm}^{-1}$ ): 3417, 2940, 2870, 1689, 1463, 1428, 1064, 760

**ESI-HRMS** ( $m/z$ ):  $[\text{M}+\text{H}]^+$  calc'd for  $\text{C}_{27}\text{H}_{27}\text{NO}_3^+$ :414.2064; found: 414.2055

**Optical Rotation:**  $[\alpha]_{\text{D}}^{20} = +212.0^\circ$  ( $c$  0.04,  $\text{CHCl}_3$ )

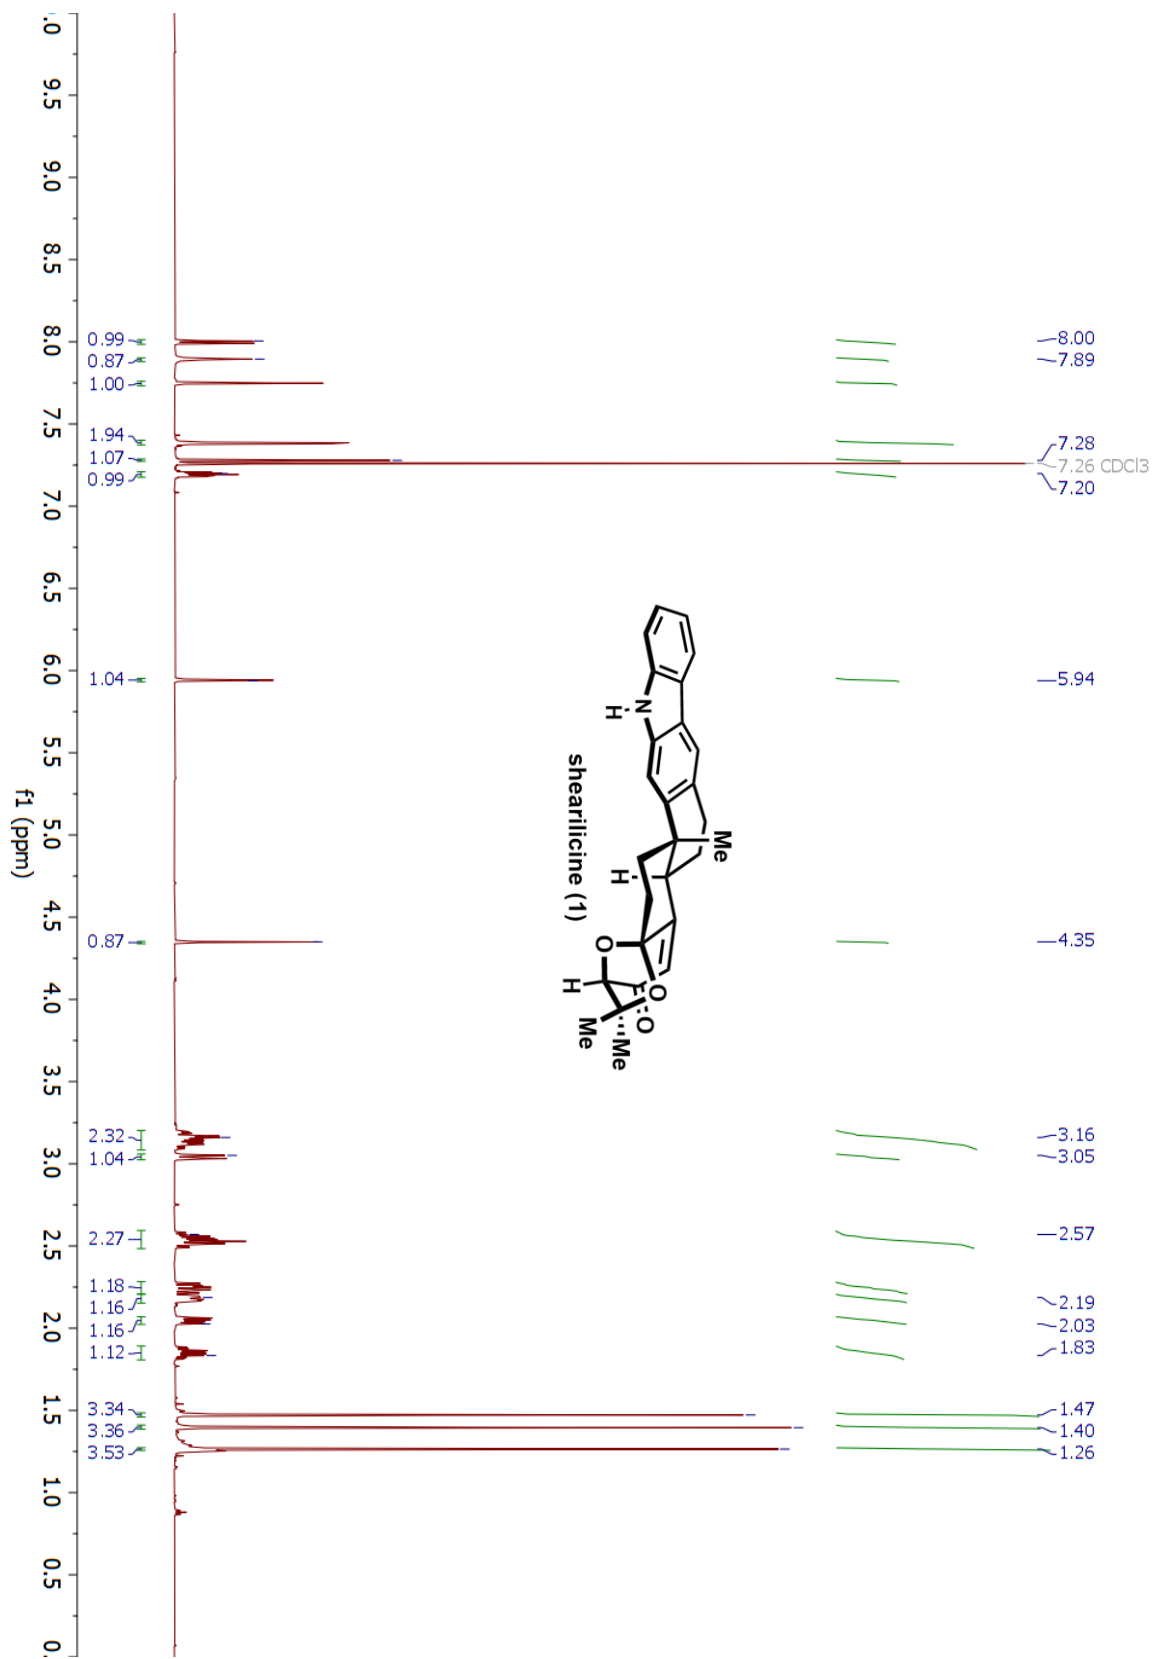

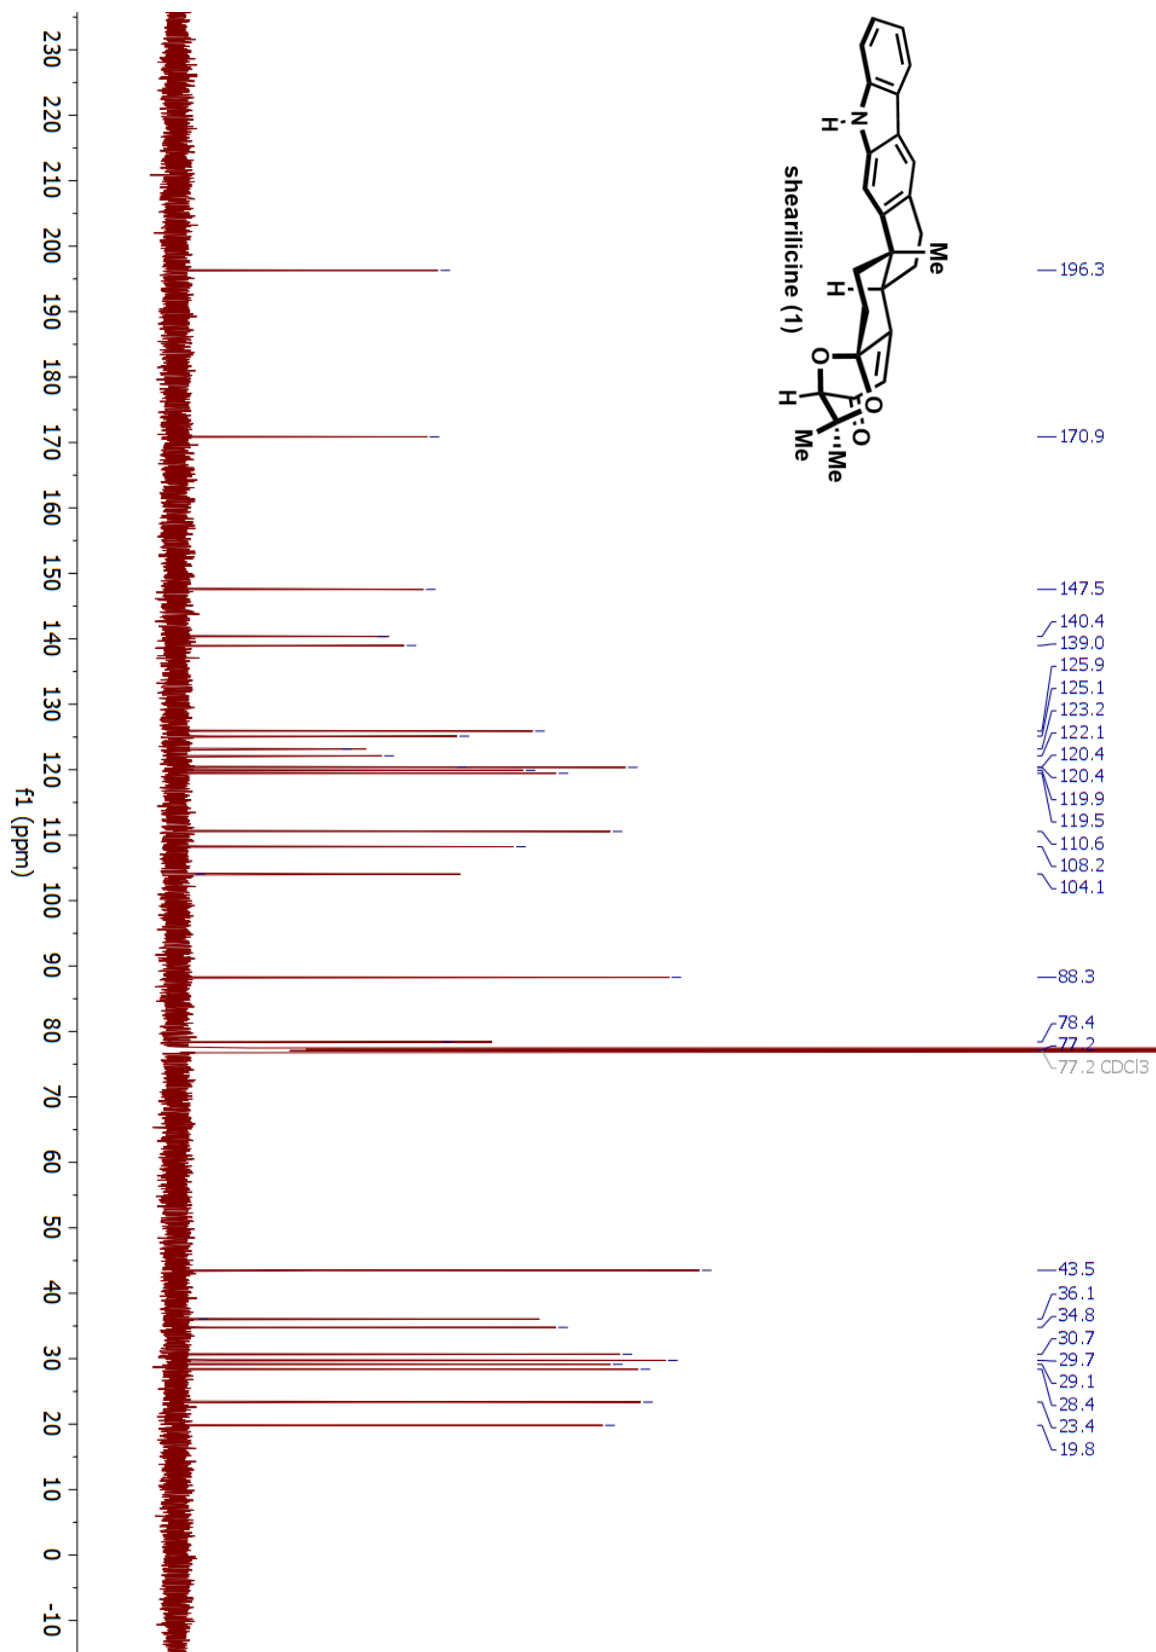

Table S1. Comparison of Synthetic and Natural <sup>1</sup>H NMR for Shearilicine (**1**)

| <b><sup>1</sup>H NMR<br/>(CDCl<sub>3</sub>)</b> | <b>Proksch's isolation report (ppm)</b> |                                          | <b>This report (ppm)</b> |                                          | <b>Difference</b> |
|-------------------------------------------------|-----------------------------------------|------------------------------------------|--------------------------|------------------------------------------|-------------------|
|                                                 | 8.00                                    | (d, <i>J</i> = 7.7 Hz, 1 H)              | 8.00                     | (d, <i>J</i> = 7.6 Hz, 1H)               | 0.00              |
|                                                 | 7.90                                    | (s, 1H)                                  | 7.91                     | (br s, 1H)                               | 0.01              |
|                                                 | 7.75                                    | (s, 1H)                                  | 7.75                     | (s, 1H)                                  | 0.00              |
|                                                 | 7.38                                    | (ov, 1H)                                 | 7.38                     | (ov, 1H)                                 | 0.00              |
|                                                 | 7.38                                    | (ov, 1H)                                 | 7.38                     | (ov, 1H)                                 | 0.00              |
|                                                 | 7.28                                    | (s, 1H)                                  | 7.27                     | (s, 1H)                                  | 0.01              |
|                                                 | 7.19                                    | (m, 1H)                                  | 7.19                     | (m, 1H)                                  | 0.00              |
|                                                 | 5.94                                    | (br s, 1H)                               | 5.93                     | (br s, 1H)                               | 0.00              |
|                                                 | 4.35                                    | (d, <i>J</i> = 1.2 Hz, 1H)               | 4.35                     | (d, <i>J</i> = 1.1 Hz, 1H)               | 0.00              |
|                                                 | 3.14                                    | (m, 2H)                                  | 3.15                     | (m, 2H)                                  | 0.01              |
|                                                 | 3.04                                    | (dt, <i>J</i> = 12.0, 2.6 Hz, 1H)        | 3.04                     | (dt, <i>J</i> = 12.1, 2.6 Hz, 1H)        | 0.00              |
|                                                 | 2.53                                    | (m, 2H)                                  | 2.53                     | (m, 2H)                                  | 0.00              |
|                                                 | 2.24                                    | (ddd, <i>J</i> = 14.0, 11.9, 9.2 Hz, 1H) | 2.25                     | (ddd, <i>J</i> = 13.9, 11.3, 9.6 Hz, 1H) | 0.01              |
|                                                 | 2.18                                    | (m, 1H)                                  | 2.18                     | (m, 1H)                                  | 0.00              |
|                                                 | 2.04                                    | (br dd, <i>J</i> = 14.0, 6.3 Hz, 1H)     | 2.04                     | (br dd, <i>J</i> = 13.9, 7.4 Hz, 1H)     | 0.00              |
|                                                 | 1.85                                    | (qd, <i>J</i> = 12.0, 6.1 Hz, 1H)        | 1.85                     | (qd, <i>J</i> = 12.4, 6.1 Hz, 1H)        | 0.00              |
|                                                 | 1.47                                    | (s, 3H)                                  | 1.47                     | (s, 3H)                                  | 0.00              |
|                                                 | 1.39                                    | (s, 3H)                                  | 1.39                     | (s, 3H)                                  | 0.00              |
|                                                 | 1.26                                    | (s, 3H)                                  | 1.26                     | (s, 3H)                                  | 0.00              |

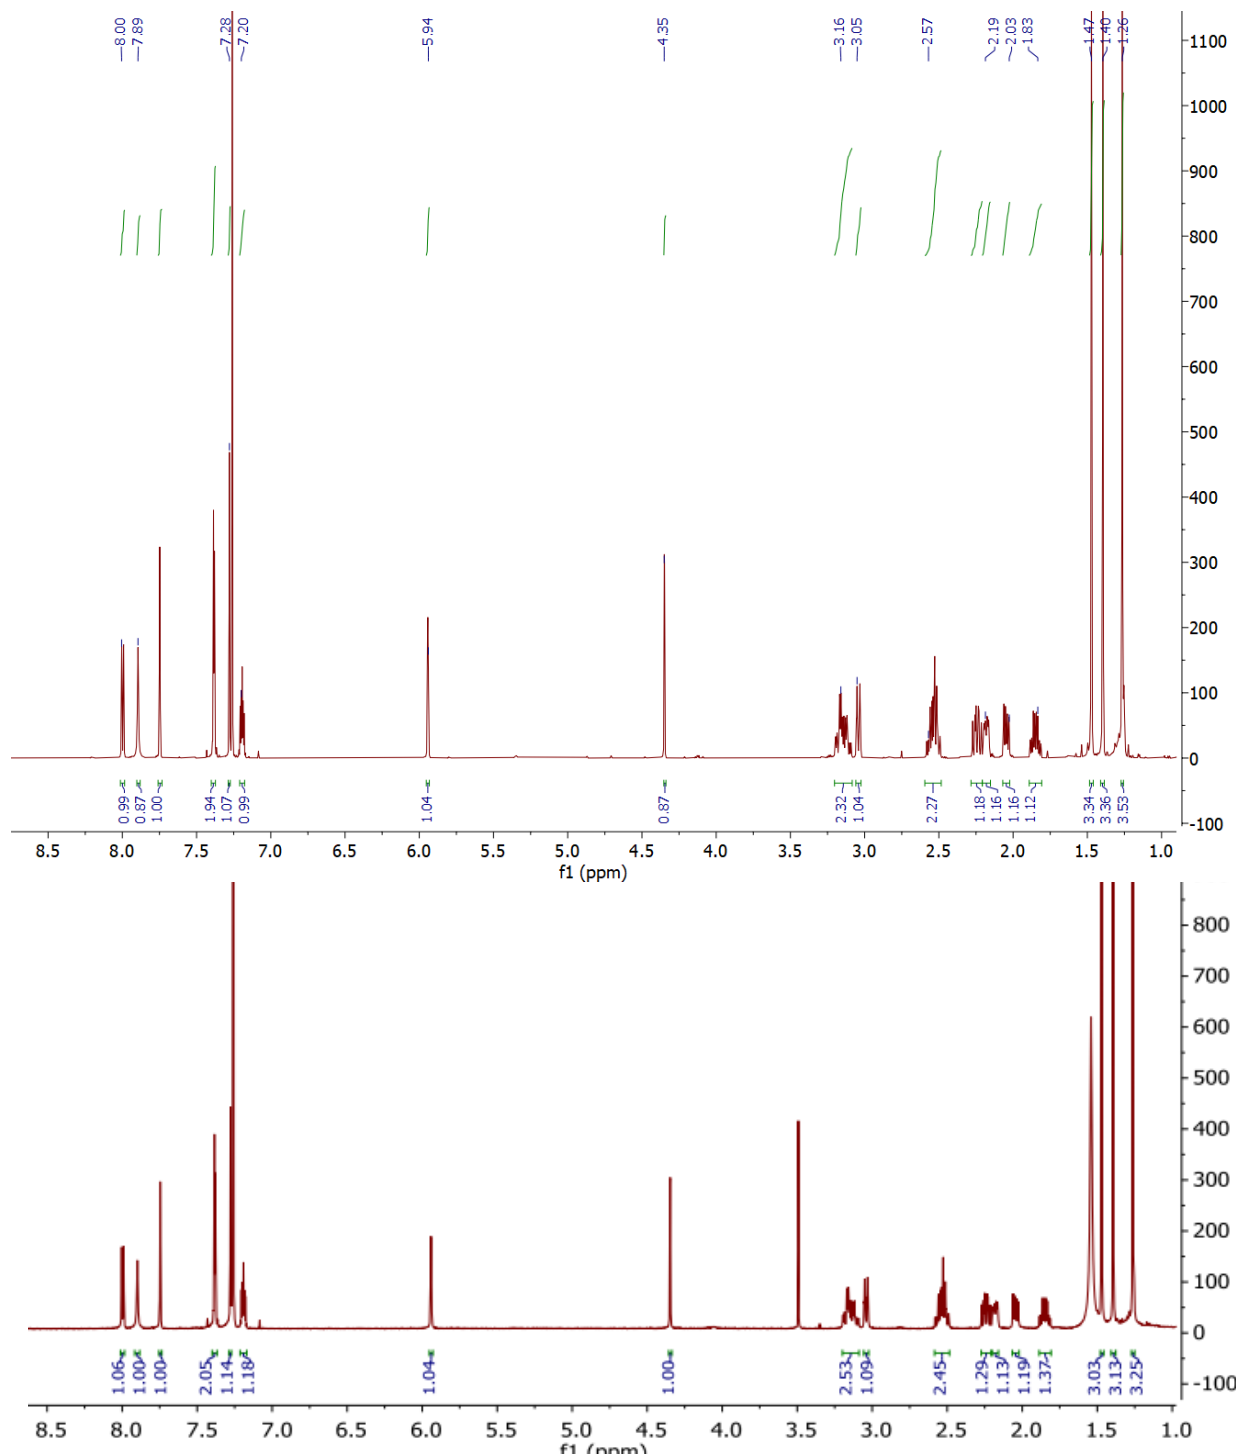

Table S2. Comparison of Synthetic and Natural  $^{13}\text{C}$  NMR for Shearilicine (**1**)

**Note:** The isolation report extracted  $^{13}\text{C}$  chemical shifts from HMBC and HSQC spectra, which might be the cause for discrepancies.

|                                            | Proksch's isolation report (ppm) | This report (ppm) | Difference |
|--------------------------------------------|----------------------------------|-------------------|------------|
| $^{13}\text{C}$ NMR<br>( $\text{CDCl}_3$ ) | 197.5                            | 196.3             | -1.2       |
|                                            | 171.0                            | 170.9             | -0.1       |
|                                            | 147.6                            | 147.5             | -0.1       |
|                                            | 140.1                            | 140.4             | 0.3        |
|                                            | 139.8                            | 139.0             | -0.8       |
|                                            | 125.8                            | 125.9             | 0.1        |
|                                            | 125.6                            | 125.1             | -0.5       |
|                                            | 123.1                            | 123.2             | 0.1        |
|                                            | 122.2                            | 122.1             | -0.1       |
|                                            | 120.4                            | 120.4             | 0.0        |
|                                            | 120.2                            | 120.4             | 0.2        |
|                                            | 119.7                            | 119.9             | 0.2        |
|                                            | 119.1                            | 119.5             | 0.4        |
|                                            | 110.7                            | 110.6             | -0.1       |
|                                            | 107.8                            | 108.2             | 0.4        |
|                                            | 103.9                            | 104.1             | 0.2        |
|                                            | 88.1                             | 88.3              | 0.2        |
|                                            | 78.7                             | 78.4              | -0.3       |
|                                            | 43.3                             | 43.5              | 0.2        |
|                                            | 35.9                             | 36.1              | 0.2        |
|                                            | 34.5                             | 34.8              | 0.3        |
|                                            | 30.8                             | 30.7              | -0.1       |
|                                            | 29.5                             | 29.7              | 0.2        |
| 28.7                                       | 29.1                             | 0.4               |            |
| 27.7                                       | 28.4                             | 0.7               |            |
| 22.8                                       | 23.4                             | 0.6               |            |
| 19.9                                       | 19.8                             | -0.1              |            |

## Computational Details

Density functional theory calculations were performed with Gaussian 16 program.<sup>3</sup> The molecular structure optimizations were carried out using the hybrid density functional method based on Becke's three-parameter exchange function and the Lee-Yang-Parr nonlocal correlation functional (rB3LYP)<sup>4</sup>, the LANL2DZ basis set for Pd,<sup>5</sup> and the 6-31G\* basis set for H, C, N, O, and P<sup>6</sup> with an empirical dispersion correction. The vibrational frequencies were computed at the same level to check whether each optimized structure is at an energy minimum on the potential energy surfaces (no imaginary frequency) or a transition state (one imaginary frequency) and to evaluate its zero-point vibrational energy (ZPVE) and thermal corrections at 298.15 K. The intrinsic reaction coordinate (IRC) method was used to track minimum energy paths from transition structures to the corresponding local minima.<sup>7</sup> Single point energies were calculated at the r**ω**b97xd<sup>8</sup> level using the SDD basis set for Pd,<sup>9</sup> and the 6-311+G\*\*<sup>10</sup> basis set for H, C, N, O, and P in acetonitrile solvent (cpcm model).

|                                      | <b>E(rB3LYP/LANL2DZ and 6-31G*) (A.U.)</b> | <b>E(r<b>ω</b>b97xd/SDD and 6-311+G**) (A.U.)</b> |
|--------------------------------------|--------------------------------------------|---------------------------------------------------|
| <b>CP1A</b>                          | -5126.671897                               | -5130.267602                                      |
| <b>TS1A</b>                          | -5126.656024                               | -5130.249201                                      |
| <b>CP2A</b>                          | -5126.679841                               | -5130.281765                                      |
| <b>CP3A</b>                          | -2783.746228                               | -2784.572751                                      |
| <b>CP4A</b>                          | -2783.745552                               | -2784.571844                                      |
| <b>TS2A</b><br>(= TS-L1 in Figure 3) | -2783.705254                               | -2784.5258                                        |
| <b>CP5A</b>                          | -2783.764065                               | -2784.593939                                      |
| <b>TS3A</b>                          | -2783.756111                               | -2784.588231                                      |
| <b>CP6A</b>                          | -2783.77168                                | -2784.595221                                      |
| <b>AgOAc</b>                         | -374.26547                                 | -375.514993                                       |



|                                      |              |              |
|--------------------------------------|--------------|--------------|
| <b>AgBr</b>                          | -2717.2197   | -2721.250902 |
| <b>CP3B</b>                          | -2568.72745  | -2569.564738 |
| <b>TS2B</b><br>(= TS-L2 in Figure 3) | -2568.670108 | -2569.512624 |
| <b>CP5B</b>                          | -2568.716587 | -2569.562324 |
| <b>TS3B</b>                          | -2568.709488 | -2569.557892 |
| <b>CP6B</b>                          | -2568.723257 | -2569.562587 |

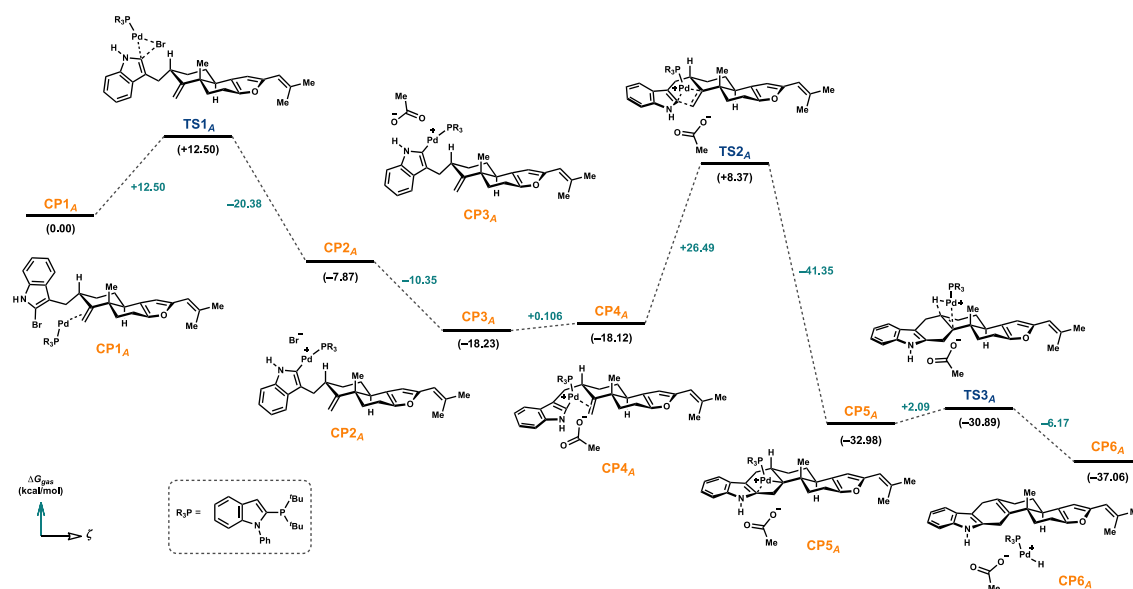

**Figure S1. Gibbs free-energy profile for the reaction process of Pd-mediated Heck cyclization.**

The computation was performed at the *rw97xd/SDD(Pd)/6-311+G\*\** (C, H, C, N, O, and P)//*rB3LYP/LANL2DZ(Pd)/6-31G\** (H, C, N, O, and P) level of theory in MeCN solvent (cpcm model).

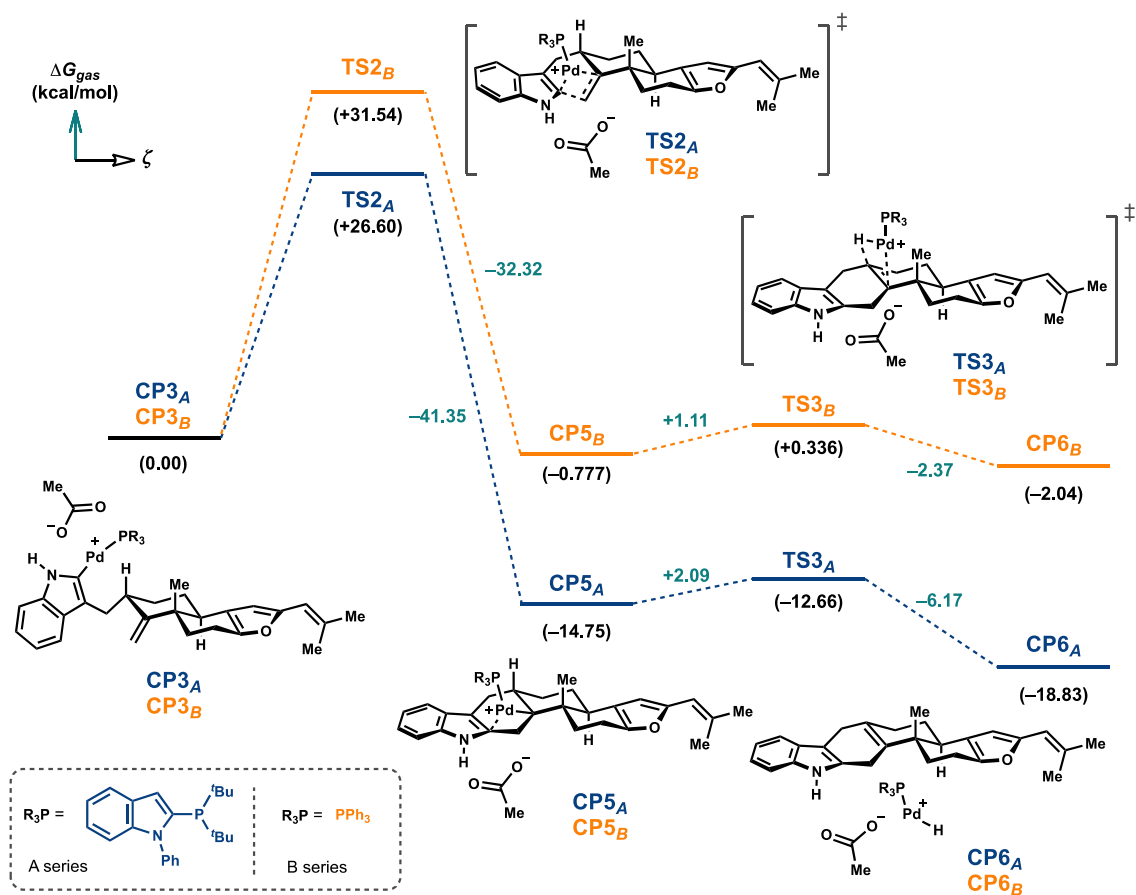

**Figure S2. Comparison of Gibbs Free-Energies for the Reaction Process of the Migratory Insertion and *syn*  $\beta$ -hydride Elimination Using CataCXium Ligand and PPh<sub>3</sub>.**

The computation was performed at the  $\omega$ b97xd/SDD(Pd)/6-311+G<sup>\*\*</sup>(C, H, C, N, O, and P)//rB3LYP/LANL2DZ(Pd)/6-31G<sup>\*</sup>(H, C, N, O, and P) level of theory in MeCN solvent (cpcm model).

CP1A

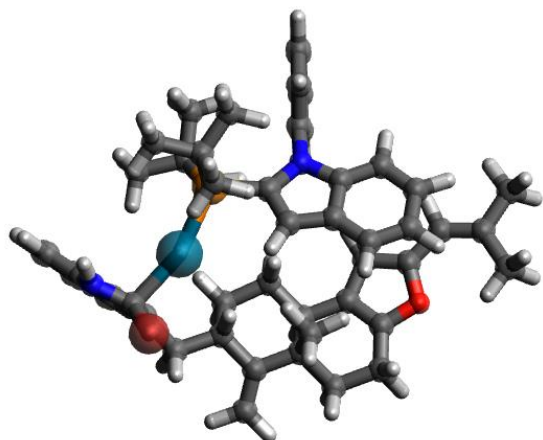

Zero-point correction= 0.962251 (Hartree/Particle)  
 Thermal correction to Energy= 1.017590  
 Thermal correction to Enthalpy= 1.018534  
 Thermal correction to Gibbs Free Energy= 0.870800  
 Sum of electronic and zero-point Energies= -5125.709646  
 Sum of electronic and thermal Energies= -5125.654307  
 Sum of electronic and thermal Enthalpies= -5125.653363  
 Sum of electronic and thermal Free Energies= -5125.801097

Cartesian Coordinates

| Atom | X           | Y           | Z           |
|------|-------------|-------------|-------------|
| C    | -1.05842500 | -3.65243400 | 0.30066500  |
| C    | 1.28717100  | -2.72062500 | 0.64731800  |
| H    | 1.14842500  | -2.14871800 | -0.28104100 |
| C    | 2.79996900  | -2.97303200 | 0.73330200  |
| H    | 3.04869000  | -3.43461200 | 1.69700200  |
| H    | 3.08222200  | -3.68953400 | -0.04697700 |
| C    | 5.35299200  | -0.23153000 | 1.04189500  |
| C    | 4.34849100  | -1.04214300 | 1.63441700  |
| C    | 3.64533700  | -1.73603900 | 0.56981600  |
| N    | 5.32909300  | -0.44141400 | -0.33067000 |
| H    | 5.64353000  | 0.25672300  | -0.99095000 |
| C    | 4.19440400  | -1.03622200 | 3.02688400  |
| C    | 6.15406600  | 0.62272400  | 1.79875400  |
| C    | 5.00493300  | -0.19940900 | 3.78916500  |
| H    | 4.88972200  | -0.17709600 | 4.86883500  |
| C    | 5.96734800  | 0.62643900  | 3.18051000  |
| H    | 6.58213100  | 1.27521400  | 3.79752600  |
| H    | 3.43731400  | -1.65633400 | 3.49731800  |

|    |             |             |             |
|----|-------------|-------------|-------------|
| H  | 6.90048900  | 1.25766500  | 1.33012700  |
| C  | 0.41357300  | -3.96243400 | 0.58617500  |
| C  | 0.88435200  | -5.19421400 | 0.80481400  |
| H  | 1.93371700  | -5.37833900 | 1.01123900  |
| H  | 0.24766600  | -6.07193700 | 0.78844600  |
| Pd | 2.47663200  | 0.06458200  | -0.62014300 |
| P  | 1.15906600  | 1.98326900  | -0.55820200 |
| C  | 0.78654400  | -1.81014900 | 1.78172300  |
| H  | 0.88020000  | -2.34396800 | 2.73923300  |
| H  | 1.42667500  | -0.92546000 | 1.82743200  |
| C  | -1.55070900 | -2.64784300 | 1.40493000  |
| H  | -1.45047700 | -3.19914700 | 2.35402300  |
| C  | -0.66732000 | -1.40547100 | 1.54324800  |
| H  | -0.73450800 | -0.78062800 | 0.64697300  |
| H  | -1.03323200 | -0.79498500 | 2.37918000  |
| C  | -1.16527800 | -3.06519200 | -1.12476800 |
| H  | -0.83663000 | -3.81514100 | -1.85349000 |
| H  | -2.18972000 | -2.77298000 | -1.35754000 |
| H  | -0.54682800 | -2.17897400 | -1.25571500 |
| C  | -1.97847100 | -4.89546900 | 0.37797200  |
| H  | -1.61596800 | -5.67092100 | -0.30544000 |
| H  | -1.92309100 | -5.31124200 | 1.39122500  |
| C  | -3.00508400 | -2.35082800 | 1.18028900  |
| C  | -3.45997400 | -4.59042600 | 0.03478300  |
| H  | -3.61021600 | -4.59512700 | -1.05446700 |
| H  | -4.10263800 | -5.38736000 | 0.43182600  |
| C  | -3.82973300 | -3.26117500 | 0.58871300  |
| C  | -3.80849400 | -1.19403200 | 1.43169800  |
| H  | -3.49679800 | -0.25973300 | 1.87688300  |
| C  | -5.07454800 | -1.47266700 | 0.97170900  |
| O  | -5.09089600 | -2.75038900 | 0.45042700  |
| C  | 1.44794700  | 2.84956700  | 1.11698900  |
| C  | 1.58177300  | 3.14285500  | -2.01510500 |
| C  | -2.33085500 | 0.43387100  | -1.82164400 |
| C  | -2.88776900 | 1.52998900  | -1.11627100 |
| C  | -4.26742500 | 1.75912000  | -1.05549100 |
| C  | -5.09107400 | 0.86337900  | -1.72412100 |
| C  | -4.55999300 | -0.23381100 | -2.43481800 |
| C  | -3.19178900 | -0.45216200 | -2.49525100 |
| C  | -0.91736100 | 0.50903100  | -1.62600900 |

|   |             |             |             |
|---|-------------|-------------|-------------|
| H | -4.67411400 | 2.60119100  | -0.50544800 |
| H | -6.16656100 | 1.00084300  | -1.68639400 |
| H | -5.23785600 | -0.91741400 | -2.93710300 |
| H | -2.78723800 | -1.29304500 | -3.04986200 |
| H | -0.16614800 | -0.17143900 | -1.99976700 |
| C | -0.62317900 | 1.61229900  | -0.84266300 |
| N | -1.84791200 | 2.25535600  | -0.54288800 |
| C | -2.14678800 | 3.36888300  | 0.29827600  |
| C | -2.48070200 | 3.14932900  | 1.63770700  |
| C | -2.23066500 | 4.65543400  | -0.23867200 |
| C | -2.81770800 | 4.22493900  | 2.45791100  |
| H | -2.47574100 | 2.13509700  | 2.02230700  |
| C | -2.57103100 | 5.73042100  | 0.58310000  |
| H | -2.02514600 | 4.80468500  | -1.29111400 |
| C | -2.85114800 | 5.51899100  | 1.93421600  |
| H | -3.06026800 | 4.05122900  | 3.50199500  |
| H | -2.62118300 | 6.73156100  | 0.16542400  |
| H | -3.11079700 | 6.35756100  | 2.57353700  |
| C | 2.95661800  | 2.74882300  | 1.43430700  |
| H | 3.56955800  | 3.36030300  | 0.76899500  |
| H | 3.12376300  | 3.10330800  | 2.45951100  |
| H | 3.30847400  | 1.71566600  | 1.36972500  |
| C | 1.02290300  | 4.32121100  | 1.22384700  |
| H | 1.24019500  | 4.67933500  | 2.23861700  |
| H | 1.58326900  | 4.95579800  | 0.53154500  |
| H | -0.03930300 | 4.47211200  | 1.04319500  |
| C | 0.71931000  | 1.99926800  | 2.17259200  |
| H | -0.34845500 | 1.91228900  | 1.97844500  |
| H | 1.14116400  | 0.99347800  | 2.21317400  |
| H | 0.84761400  | 2.46165000  | 3.15939300  |
| C | 2.99031800  | 3.72493000  | -1.81718500 |
| H | 3.02687700  | 4.46741300  | -1.01571700 |
| H | 3.71492600  | 2.93437900  | -1.59231500 |
| H | 3.30794200  | 4.22254300  | -2.74238500 |
| C | 0.56161400  | 4.26554600  | -2.23853500 |
| H | 0.87430300  | 4.88211400  | -3.09164200 |
| H | -0.42157000 | 3.84857900  | -2.47476800 |
| H | 0.46086900  | 4.92136300  | -1.37117100 |
| C | -6.25598500 | -0.64634200 | 0.97538000  |
| H | -6.07389700 | 0.30767500  | 1.46724800  |

|    |             |             |             |
|----|-------------|-------------|-------------|
| C  | -7.48572800 | -0.84967700 | 0.45857800  |
| C  | -8.53981000 | 0.21939600  | 0.59191100  |
| H  | -8.88619500 | 0.55599000  | -0.39646400 |
| H  | -9.42863500 | -0.16225000 | 1.11471700  |
| H  | -8.17355200 | 1.09381000  | 1.13914000  |
| C  | -7.92603800 | -2.07917600 | -0.28993200 |
| H  | -8.27785100 | -1.80340100 | -1.29490600 |
| H  | -7.13405800 | -2.81872600 | -0.39043800 |
| H  | -8.78161500 | -2.55059500 | 0.21495600  |
| C  | 1.60562400  | 2.24678300  | -3.26890100 |
| H  | 0.62995700  | 1.78845100  | -3.45424200 |
| H  | 1.86738300  | 2.85577700  | -4.14416600 |
| H  | 2.34330500  | 1.44343000  | -3.16571200 |
| C  | 4.21285100  | -1.25033100 | -0.62507000 |
| Br | 4.20649800  | -2.15928000 | -2.31182400 |

### TS1A

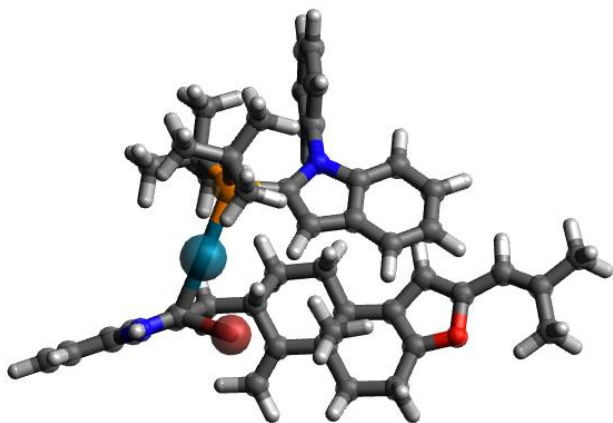

|                                              |                             |
|----------------------------------------------|-----------------------------|
| Zero-point correction=                       | 0.962000 (Hartree/Particle) |
| Thermal correction to Energy=                | 1.016640                    |
| Thermal correction to Enthalpy=              | 1.017585                    |
| Thermal correction to Gibbs Free Energy=     | 0.872325                    |
| Sum of electronic and zero-point Energies=   | -5125.694024                |
| Sum of electronic and thermal Energies=      | -5125.639383                |
| Sum of electronic and thermal Enthalpies=    | -5125.638439                |
| Sum of electronic and thermal Free Energies= | -5125.783699                |

| Cartesian Coordinates |             |             |            |
|-----------------------|-------------|-------------|------------|
| Atom                  | X           | Y           | Z          |
| C                     | -1.38559100 | -3.08228100 | 0.46218700 |
| C                     | 0.71807300  | -1.82968600 | 1.28769100 |

|    |             |             |             |
|----|-------------|-------------|-------------|
| H  | 0.73952600  | -1.20069300 | 0.38738700  |
| C  | 2.15673700  | -1.92783000 | 1.81810200  |
| H  | 2.35312700  | -1.02665200 | 2.41466400  |
| H  | 2.21380000  | -2.75304000 | 2.53925600  |
| C  | 5.42045500  | -2.51841300 | 0.03813300  |
| C  | 4.58962500  | -2.53859000 | 1.19590500  |
| C  | 3.27924200  | -2.07580500 | 0.82613100  |
| N  | 4.65525700  | -2.04310000 | -0.99823600 |
| H  | 4.94643100  | -1.90403800 | -1.95230100 |
| C  | 5.13882200  | -2.96850700 | 2.41816100  |
| C  | 6.76253600  | -2.90679000 | 0.07686200  |
| C  | 6.46813400  | -3.36834600 | 2.45682300  |
| H  | 6.90064100  | -3.70820800 | 3.39344500  |
| C  | 7.27163200  | -3.33696000 | 1.29783000  |
| H  | 8.30820000  | -3.65576800 | 1.35893100  |
| H  | 4.52960800  | -2.98722100 | 3.31727100  |
| H  | 7.38303300  | -2.87857100 | -0.81442400 |
| C  | 0.07661800  | -3.16708000 | 0.91977500  |
| C  | 0.75164600  | -4.31939400 | 0.97846200  |
| H  | 1.80018500  | -4.36037800 | 1.25182800  |
| H  | 0.29833800  | -5.27133700 | 0.72744500  |
| Pd | 2.61787800  | 0.14663300  | -0.87113000 |
| P  | 1.70921300  | 2.32596600  | -0.67861600 |
| C  | -0.15087200 | -1.07104800 | 2.31234900  |
| H  | -0.14184800 | -1.61834300 | 3.26669800  |
| H  | 0.30089100  | -0.09171700 | 2.50185300  |
| C  | -2.19801000 | -2.27453900 | 1.53422000  |
| H  | -2.11631600 | -2.85717700 | 2.46634700  |
| C  | -1.58920700 | -0.90401400 | 1.83143000  |
| H  | -1.62247000 | -0.26911300 | 0.93957100  |
| H  | -2.18828200 | -0.39855000 | 2.60045300  |
| C  | -1.41539400 | -2.39319400 | -0.91892500 |
| H  | -0.92337100 | -3.03326500 | -1.65713400 |
| H  | -2.43978200 | -2.19925900 | -1.24105700 |
| H  | -0.88969900 | -1.44092800 | -0.91069200 |
| C  | -2.06625800 | -4.46762400 | 0.32621600  |
| H  | -1.48709800 | -5.10259800 | -0.35149400 |
| H  | -2.06332600 | -4.95935300 | 1.30662600  |
| C  | -3.64063600 | -2.22237900 | 1.12365600  |
| C  | -3.52055600 | -4.39730400 | -0.20804300 |

|   |             |             |             |
|---|-------------|-------------|-------------|
| H | -3.52064400 | -4.33104500 | -1.30565100 |
| H | -4.05020600 | -5.32699500 | 0.03893400  |
| C | -4.19991300 | -3.20603700 | 0.36369400  |
| C | -4.65540700 | -1.23033800 | 1.29854100  |
| H | -4.56827500 | -0.28280800 | 1.81069700  |
| C | -5.76923600 | -1.66777700 | 0.62135500  |
| O | -5.49327700 | -2.89266500 | 0.04579800  |
| C | 2.46542000  | 3.04027700  | 0.91713800  |
| C | 1.89936700  | 3.53076700  | -2.14336800 |
| C | -2.10541500 | 1.21765400  | -1.29082800 |
| C | -2.38522900 | 2.29084800  | -0.40836700 |
| C | -3.69198800 | 2.63854600  | -0.04331200 |
| C | -4.72593200 | 1.89603200  | -0.60023600 |
| C | -4.47249500 | 0.83626800  | -1.49751700 |
| C | -3.17623400 | 0.49464500  | -1.84965800 |
| C | -0.68058400 | 1.11821600  | -1.36396400 |
| H | -3.88475700 | 3.45533800  | 0.64435800  |
| H | -5.75329500 | 2.13204900  | -0.33825100 |
| H | -5.30946700 | 0.27096400  | -1.89446700 |
| H | -2.98429300 | -0.32590100 | -2.53320300 |
| H | -0.10758600 | 0.39882600  | -1.93098200 |
| C | -0.11665500 | 2.10819500  | -0.57519900 |
| N | -1.17675700 | 2.84923600  | -0.00252900 |
| C | -1.16831600 | 3.86809400  | 0.99642400  |
| C | -1.22157500 | 3.50828700  | 2.34599300  |
| C | -1.22931700 | 5.21362500  | 0.62774100  |
| C | -1.25468900 | 4.49722800  | 3.32818000  |
| H | -1.24471900 | 2.45596100  | 2.61008100  |
| C | -1.26861200 | 6.20121700  | 1.61277300  |
| H | -1.23837400 | 5.47506600  | -0.42326200 |
| C | -1.26704600 | 5.84505200  | 2.96262300  |
| H | -1.27959600 | 4.21513200  | 4.37646100  |
| H | -1.30249200 | 7.24759500  | 1.32446100  |
| H | -1.29148600 | 6.61517500  | 3.72788200  |
| C | 3.99153200  | 2.80720800  | 0.83475100  |
| H | 4.47634400  | 3.43079600  | 0.08191600  |
| H | 4.43534100  | 3.05403900  | 1.80760400  |
| H | 4.22180300  | 1.75905800  | 0.61056500  |
| C | 2.21003000  | 4.52048200  | 1.22849600  |
| H | 2.70223800  | 4.77596000  | 2.17596800  |



|    |              |             |             |
|----|--------------|-------------|-------------|
| H  | 2.63088300   | 5.17428600  | 0.45913900  |
| H  | 1.15243200   | 4.75227900  | 1.33358000  |
| C  | 1.94687400   | 2.14576500  | 2.05582000  |
| H  | 0.86732300   | 2.21630200  | 2.17989700  |
| H  | 2.20372900   | 1.09892400  | 1.86546300  |
| H  | 2.41679100   | 2.44740400  | 3.00035500  |
| C  | 3.35990400   | 3.99709800  | -2.24695300 |
| H  | 3.63558300   | 4.68485700  | -1.44313100 |
| H  | 4.05305400   | 3.14895100  | -2.23430600 |
| H  | 3.49961000   | 4.52933400  | -3.19625600 |
| C  | 0.95519700   | 4.73770800  | -2.07048400 |
| H  | 1.11208400   | 5.38045800  | -2.94668900 |
| H  | -0.08932500  | 4.41317500  | -2.07951500 |
| H  | 1.12184700   | 5.34407800  | -1.17698200 |
| C  | -7.04048400  | -1.01364200 | 0.43080500  |
| H  | -7.08810400  | -0.07092600 | 0.97415600  |
| C  | -8.12095000  | -1.35956200 | -0.30156700 |
| C  | -9.32667800  | -0.45541600 | -0.33187600 |
| H  | -9.55502300  | -0.13689800 | -1.35923000 |
| H  | -10.22171000 | -0.97906900 | 0.03393300  |
| H  | -9.18547000  | 0.44182300  | 0.27903700  |
| C  | -8.25284800  | -2.61315000 | -1.12499900 |
| H  | -8.48340900  | -2.35893100 | -2.16959100 |
| H  | -7.35501900  | -3.22802600 | -1.10617600 |
| H  | -9.09689700  | -3.21865400 | -0.76406500 |
| C  | 1.56502500   | 2.71305700  | -3.40558200 |
| H  | 0.53250100   | 2.35368800  | -3.39058700 |
| H  | 1.69014000   | 3.34954200  | -4.29097500 |
| H  | 2.22554800   | 1.84531200  | -3.50238500 |
| C  | 3.37692700   | -1.72569800 | -0.53017800 |
| Br | 1.95489800   | -2.10675400 | -2.10304400 |

**CP2A**

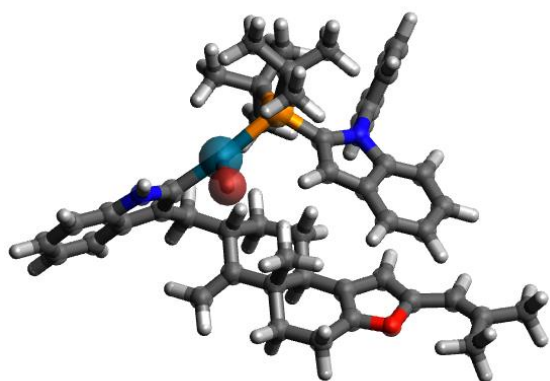

Zero-point correction= 0.962776 (Hartree/Particle)  
 Thermal correction to Energy= 1.017888  
 Thermal correction to Enthalpy= 1.018832  
 Thermal correction to Gibbs Free Energy= 0.872415  
 Sum of electronic and zero-point Energies= -5125.717064  
 Sum of electronic and thermal Energies= -5125.661952  
 Sum of electronic and thermal Enthalpies= -5125.661008  
 Sum of electronic and thermal Free Energies= -5125.807426

Cartesian Coordinates

| Atom | X           | Y           | Z           |
|------|-------------|-------------|-------------|
| C    | -0.35269800 | -3.09537500 | 0.49051500  |
| C    | 1.37608800  | -1.64333200 | 1.70820000  |
| H    | 1.26150700  | -0.90019000 | 0.89670300  |
| C    | 2.81286700  | -1.47752700 | 2.22659600  |
| H    | 2.85334200  | -0.55260100 | 2.82047100  |
| H    | 3.04892000  | -2.28142200 | 2.93350800  |
| C    | 5.69586100  | -1.95791600 | -0.15633300 |
| C    | 5.08190500  | -2.17759100 | 1.11297600  |
| C    | 3.83994600  | -1.45095000 | 1.12878700  |
| N    | 4.87436900  | -1.10041300 | -0.85456000 |
| H    | 4.98044800  | -0.80572400 | -1.81327600 |
| C    | 5.72476000  | -3.01836900 | 2.03995400  |
| C    | 6.91615400  | -2.54299800 | -0.50441800 |
| C    | 6.93076900  | -3.61232500 | 1.69060000  |
| H    | 7.43268600  | -4.26668500 | 2.39784000  |
| C    | 7.52123000  | -3.37569700 | 0.43138700  |
| H    | 8.46554400  | -3.85390000 | 0.18698800  |
| H    | 5.28340900  | -3.20054500 | 3.01640500  |
| H    | 7.37151600  | -2.36066000 | -1.47393100 |

|    |             |             |             |
|----|-------------|-------------|-------------|
| C  | 1.04208100  | -3.01073600 | 1.11814100  |
| C  | 1.88615900  | -4.04491800 | 1.17074400  |
| H  | 2.88509900  | -3.95882900 | 1.58144300  |
| H  | 1.62519900  | -5.02137100 | 0.77858000  |
| Pd | 2.46496300  | 0.64722700  | -0.50961800 |
| P  | 0.94853700  | 2.60065700  | -0.48269900 |
| C  | 0.32486200  | -1.27585600 | 2.77275400  |
| H  | 0.37102700  | -2.01186000 | 3.58801200  |
| H  | 0.56298100  | -0.30268200 | 3.21524300  |
| C  | -1.39382100 | -2.64361900 | 1.57448900  |
| H  | -1.27698600 | -3.35967700 | 2.40446900  |
| C  | -1.08060600 | -1.26681500 | 2.16819400  |
| H  | -1.15868300 | -0.49076800 | 1.39523800  |
| H  | -1.82506100 | -1.02528100 | 2.93843900  |
| C  | -0.36704500 | -2.18488000 | -0.75345100 |
| H  | 0.35981600  | -2.54458300 | -1.48818600 |
| H  | -1.35587500 | -2.15036900 | -1.21364500 |
| H  | -0.09630800 | -1.15977300 | -0.51554100 |
| C  | -0.74432800 | -4.52572200 | 0.04607700  |
| H  | 0.01088400  | -4.91967700 | -0.64153100 |
| H  | -0.75266100 | -5.18175500 | 0.92528300  |
| C  | -2.78443800 | -2.78541800 | 1.02814300  |
| C  | -2.12619400 | -4.59532500 | -0.65237800 |
| H  | -2.03573300 | -4.30784900 | -1.70966700 |
| H  | -2.49125000 | -5.63072700 | -0.64943600 |
| C  | -3.07206500 | -3.68627100 | 0.04588700  |
| C  | -4.01477200 | -2.12069500 | 1.32919700  |
| H  | -4.17753500 | -1.32452900 | 2.04195100  |
| C  | -4.97460400 | -2.65250500 | 0.50044800  |
| O  | -4.39533000 | -3.62156700 | -0.29357200 |
| C  | 1.44804200  | 3.26311100  | 1.23058600  |
| C  | 1.01865500  | 3.94761500  | -1.81867200 |
| C  | -2.43326100 | 0.68597600  | -1.43462100 |
| C  | -3.00771500 | 1.57418500  | -0.49165500 |
| C  | -4.37464000 | 1.55671400  | -0.18555300 |
| C  | -5.16140800 | 0.62826400  | -0.85377200 |
| C  | -4.61053000 | -0.26526900 | -1.79820000 |
| C  | -3.25804000 | -0.24332700 | -2.09623000 |
| C  | -1.03189900 | 0.96017900  | -1.45075600 |
| H  | -4.79693100 | 2.24015700  | 0.54374300  |

|   |             |             |             |
|---|-------------|-------------|-------------|
| H | -6.22322500 | 0.57201100  | -0.63595500 |
| H | -5.26002300 | -0.99071800 | -2.27671100 |
| H | -2.83332900 | -0.93475800 | -2.81777600 |
| H | -0.28127300 | 0.46705300  | -2.05189100 |
| C | -0.76664500 | 1.97939700  | -0.55187100 |
| N | -1.99674600 | 2.38057200  | 0.02242700  |
| C | -2.27114400 | 3.28928700  | 1.08695900  |
| C | -2.35072200 | 2.80761400  | 2.39735200  |
| C | -2.56696300 | 4.62648400  | 0.81413600  |
| C | -2.65315300 | 3.68032800  | 3.44172300  |
| H | -2.18236200 | 1.75120700  | 2.58129400  |
| C | -2.87275000 | 5.49703800  | 1.86116500  |
| H | -2.55139300 | 4.97412700  | -0.21136900 |
| C | -2.90359200 | 5.02844600  | 3.17583800  |
| H | -2.70032200 | 3.30643800  | 4.46010700  |
| H | -3.09071000 | 6.53924000  | 1.64798900  |
| H | -3.13753700 | 5.70826200  | 3.98969400  |
| C | 2.99330700  | 3.33221200  | 1.25524700  |
| H | 3.39654400  | 4.11124500  | 0.60778700  |
| H | 3.31966400  | 3.54340700  | 2.28105500  |
| H | 3.45754300  | 2.38019700  | 0.95596400  |
| C | 0.88999400  | 4.62210500  | 1.66809900  |
| H | 1.25966800  | 4.85177200  | 2.67605800  |
| H | 1.22641200  | 5.42668900  | 1.00799000  |
| H | -0.19761400 | 4.63750700  | 1.70272600  |
| C | 1.04330000  | 2.16018400  | 2.22166300  |
| H | -0.03078100 | 1.98558300  | 2.24187500  |
| H | 1.53146300  | 1.21233200  | 1.96853100  |
| H | 1.36506200  | 2.43656800  | 3.23332300  |
| C | 2.38496100  | 4.64936100  | -1.77283400 |
| H | 2.49408700  | 5.29024900  | -0.89348900 |
| H | 3.20867900  | 3.92758200  | -1.78890500 |
| H | 2.48594600  | 5.28888000  | -2.65813900 |
| C | -0.11964700 | 4.96884400  | -1.69282300 |
| H | -0.02820100 | 5.71347600  | -2.49405000 |
| H | -1.09006800 | 4.47745400  | -1.80701000 |
| H | -0.10880400 | 5.50005400  | -0.73806500 |
| C | -6.37182400 | -2.31720300 | 0.37628900  |
| H | -6.68240500 | -1.60510500 | 1.13931800  |
| C | -7.30400500 | -2.71014500 | -0.51771300 |

|    |             |             |             |
|----|-------------|-------------|-------------|
| C  | -8.71184500 | -2.18116700 | -0.41527300 |
| H  | -9.00299800 | -1.65410900 | -1.33534800 |
| H  | -9.43368900 | -3.00099700 | -0.28927700 |
| H  | -8.83340300 | -1.49134100 | 0.42595500  |
| C  | -7.07053100 | -3.66436000 | -1.65890700 |
| H  | -7.38686600 | -3.20574700 | -2.60681200 |
| H  | -6.02984000 | -3.97072000 | -1.74733800 |
| H  | -7.68628100 | -4.56721100 | -1.53590200 |
| C  | 0.88552700  | 3.22161300  | -3.17069000 |
| H  | -0.08048800 | 2.71750000  | -3.26117400 |
| H  | 0.95651400  | 3.96304400  | -3.97663600 |
| H  | 1.66886300  | 2.47286500  | -3.31166800 |
| C  | 3.77465300  | -0.76874000 | -0.08478800 |
| Br | 2.35135200  | -0.23820100 | -2.80263100 |

### CP3A

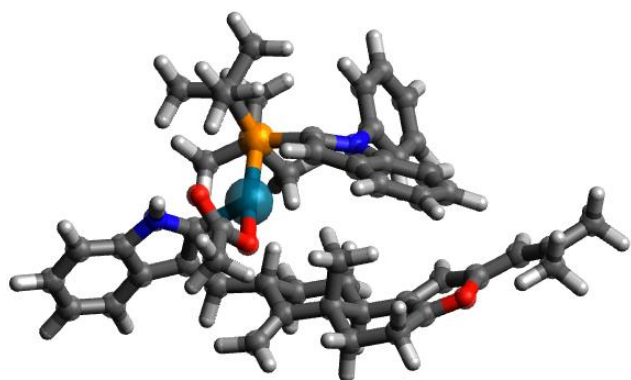

|                                              |                             |
|----------------------------------------------|-----------------------------|
| Zero-point correction=                       | 1.015883 (Hartree/Particle) |
| Thermal correction to Energy=                | 1.073435                    |
| Thermal correction to Enthalpy=              | 1.074380                    |
| Thermal correction to Gibbs Free Energy=     | 0.924951                    |
| Sum of electronic and zero-point Energies=   | -2782.730345                |
| Sum of electronic and thermal Energies=      | -2782.672792                |
| Sum of electronic and thermal Enthalpies=    | -2782.671848                |
| Sum of electronic and thermal Free Energies= | -2782.821276                |

| Cartesian Coordinates |             |            |             |
|-----------------------|-------------|------------|-------------|
| Atom                  | X           | Y          | Z           |
| C                     | -0.93743300 | 2.72012800 | -0.75851400 |
| C                     | 0.98856100  | 1.61422900 | -2.03138100 |
| H                     | 0.83122300  | 0.73517300 | -1.39385700 |
| C                     | 2.47166000  | 1.57837900 | -2.42524300 |

|    |             |             |             |
|----|-------------|-------------|-------------|
| H  | 2.57461000  | 0.81816900  | -3.21645300 |
| H  | 2.74808600  | 2.52433400  | -2.90965500 |
| C  | 5.46895300  | 1.18473900  | -0.18009600 |
| C  | 4.85081900  | 1.65645300  | -1.37226400 |
| C  | 3.45183200  | 1.28396300  | -1.32045900 |
| C  | 3.28824900  | 0.60150700  | -0.13128000 |
| N  | 4.49984400  | 0.50543200  | 0.54133900  |
| H  | 4.49910700  | 0.37128100  | 1.55017800  |
| C  | 5.63050600  | 2.35000700  | -2.31125600 |
| C  | 6.81694900  | 1.41233100  | 0.09941900  |
| C  | 6.97646200  | 2.57741100  | -2.03724000 |
| H  | 7.58640300  | 3.11910300  | -2.75537900 |
| C  | 7.56299700  | 2.11820400  | -0.84257700 |
| H  | 8.61470900  | 2.31430300  | -0.65259100 |
| H  | 5.18953100  | 2.71059700  | -3.23718600 |
| H  | 7.26783100  | 1.05069000  | 1.01977000  |
| C  | 0.51649600  | 2.82358100  | -1.23418200 |
| C  | 1.30642000  | 3.86870400  | -0.97906200 |
| H  | 2.34769900  | 3.88328700  | -1.28126900 |
| H  | 0.96337900  | 4.73490000  | -0.42453800 |
| Pd | 1.69179500  | -0.02562900 | 0.84694300  |
| P  | 1.46665800  | -2.20613300 | 0.21882000  |
| C  | 0.07782100  | 1.43867900  | -3.26351000 |
| H  | 0.17908300  | 2.31956600  | -3.91303300 |
| H  | 0.41034900  | 0.57337500  | -3.84980200 |
| C  | -1.85994100 | 2.44304900  | -1.99947900 |
| H  | -1.78619300 | 3.33869800  | -2.63559800 |
| C  | -1.38483700 | 1.26441500  | -2.85176400 |
| H  | -1.50136600 | 0.32960400  | -2.28872700 |
| H  | -2.02458000 | 1.17309700  | -3.73920100 |
| C  | -1.02796200 | 1.58340700  | 0.27969500  |
| H  | -0.35916500 | 1.80352100  | 1.11399900  |
| H  | -2.03830100 | 1.46291200  | 0.66695400  |
| H  | -0.74160600 | 0.61753700  | -0.14108000 |
| C  | -1.46231100 | 4.01073400  | -0.08519100 |
| H  | -0.79934100 | 4.29186000  | 0.73868600  |
| H  | -1.43328700 | 4.82863500  | -0.81519300 |
| C  | -3.27063700 | 2.29242900  | -1.50208800 |
| C  | -2.90334600 | 3.86917400  | 0.47829900  |
| H  | -2.87694400 | 3.44785100  | 1.49278800  |

|   |             |             |             |
|---|-------------|-------------|-------------|
| H | -3.36546800 | 4.86097200  | 0.57072500  |
| C | -3.69730600 | 2.96418900  | -0.39435900 |
| C | -4.32608400 | 1.38808400  | -1.84650400 |
| H | -4.35243500 | 0.69147600  | -2.67381100 |
| C | -5.32731400 | 1.55919300  | -0.91565500 |
| O | -4.94341100 | 2.53632700  | -0.02360100 |
| C | 1.53691200  | -2.75694100 | -1.60065500 |
| C | 2.43403800  | -3.39848600 | 1.34594300  |
| C | -1.52003000 | -0.73664800 | 2.41688900  |
| C | -2.31603100 | -1.24803500 | 1.36612100  |
| C | -3.67697000 | -0.94331400 | 1.25485200  |
| C | -4.21162800 | -0.06737100 | 2.19195200  |
| C | -3.42629000 | 0.47017500  | 3.23343100  |
| C | -2.08697500 | 0.13275300  | 3.36337600  |
| C | -0.19216900 | -1.22550800 | 2.20770100  |
| H | -4.29370700 | -1.33885200 | 0.45816900  |
| H | -5.25500200 | 0.21537500  | 2.10431500  |
| H | -3.88038200 | 1.15903800  | 3.93925900  |
| H | -1.47611100 | 0.54775900  | 4.15922500  |
| H | 0.65252600  | -1.02743300 | 2.85297700  |
| C | -0.18627000 | -2.01665500 | 1.04610500  |
| N | -1.49105300 | -2.02592300 | 0.53826500  |
| C | -2.02730100 | -2.87863000 | -0.46226000 |
| C | -2.84317800 | -2.33725400 | -1.46252500 |
| C | -1.77330200 | -4.25062900 | -0.42212500 |
| C | -3.38599900 | -3.17580200 | -2.43348500 |
| H | -3.02165600 | -1.26762600 | -1.48836300 |
| C | -2.30573800 | -5.07961800 | -1.41038000 |
| H | -1.16800100 | -4.65725100 | 0.38097700  |
| C | -3.11185800 | -4.54595300 | -2.41696600 |
| H | -4.01138500 | -2.75395900 | -3.21458700 |
| H | -2.10000200 | -6.14559100 | -1.38360800 |
| H | -3.52915400 | -5.19435600 | -3.18120000 |
| C | 2.89067100  | -2.21626900 | -2.12144400 |
| H | 3.75246800  | -2.67130300 | -1.63357700 |
| H | 2.95278100  | -2.45267400 | -3.19049100 |
| H | 2.97366100  | -1.13623000 | -1.99517900 |
| C | 1.45581600  | -4.26848500 | -1.85797900 |
| H | 1.46188700  | -4.42877200 | -2.94335500 |
| H | 2.31081700  | -4.80915300 | -1.44615100 |

|   |             |             |             |
|---|-------------|-------------|-------------|
| H | 0.53501600  | -4.70537300 | -1.46813900 |
| C | 0.42324100  | -2.04810200 | -2.38789000 |
| H | -0.51995900 | -2.58448800 | -2.33358500 |
| H | 0.26510500  | -1.02575600 | -2.04551700 |
| H | 0.71890900  | -1.99923900 | -3.44208500 |
| C | 3.85492400  | -3.57634000 | 0.78038700  |
| H | 3.87151100  | -4.12558100 | -0.16313800 |
| H | 4.35098100  | -2.61039600 | 0.63870200  |
| H | 4.44443000  | -4.15291300 | 1.50265100  |
| C | 1.71179200  | -4.74953600 | 1.48380400  |
| H | 2.27914900  | -5.38668800 | 2.17344900  |
| H | 0.71163500  | -4.61297700 | 1.90873400  |
| H | 1.61857600  | -5.28607300 | 0.53829400  |
| C | -6.58061900 | 0.86084900  | -0.76696800 |
| H | -6.73611900 | 0.13706900  | -1.56610400 |
| C | -7.53902700 | 0.94677900  | 0.18146500  |
| C | -8.75716900 | 0.06302400  | 0.09795800  |
| H | -8.85257300 | -0.56205800 | 0.99738500  |
| H | -9.67610200 | 0.66387600  | 0.04180000  |
| H | -8.72988200 | -0.59753200 | -0.77425400 |
| C | -7.52141600 | 1.88186000  | 1.36210900  |
| H | -7.62375900 | 1.31467700  | 2.29876700  |
| H | -6.61602100 | 2.48341600  | 1.41418400  |
| H | -8.38635500 | 2.55941100  | 1.32162400  |
| C | 2.80846500  | 2.86404200  | 3.82605100  |
| H | 3.46970300  | 3.55890500  | 3.29441900  |
| H | 1.85011600  | 3.36854400  | 3.97552700  |
| H | 3.26450700  | 2.61404400  | 4.78637400  |
| C | 2.63856400  | 1.61426100  | 2.97435800  |
| O | 3.34071500  | 0.60573900  | 3.19187600  |
| O | 1.76124500  | 1.72383000  | 2.03269600  |
| C | 2.57250900  | -2.77783600 | 2.75174300  |
| H | 1.62422000  | -2.79806400 | 3.29318900  |
| H | 3.28049200  | -3.39132200 | 3.32195200  |
| H | 2.94890200  | -1.75011800 | 2.73368100  |

**CP4A**



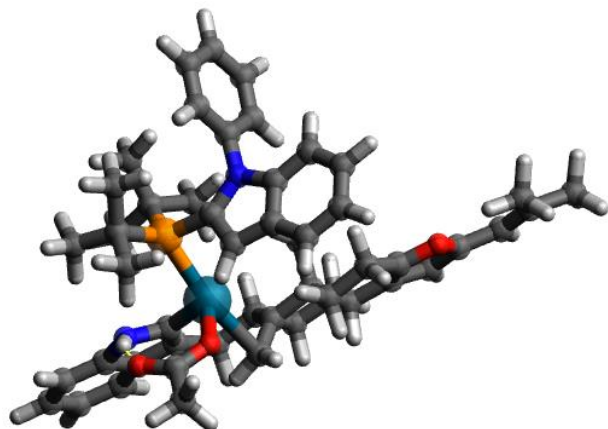

Zero-point correction= 1.015749 (Hartree/Particle)  
 Thermal correction to Energy= 1.073333  
 Thermal correction to Enthalpy= 1.074277  
 Thermal correction to Gibbs Free Energy= 0.924213  
 Sum of electronic and zero-point Energies= -2782.729803  
 Sum of electronic and thermal Energies= -2782.672220  
 Sum of electronic and thermal Enthalpies= -2782.671275  
 Sum of electronic and thermal Free Energies= -2782.821339

Cartesian Coordinates

| Atom | X           | Y           | Z           |
|------|-------------|-------------|-------------|
| C    | 1.63544000  | -1.71844600 | -0.02222400 |
| C    | -0.25457900 | -2.79297000 | -1.41566600 |
| H    | -0.23124000 | -1.93448200 | -2.09421800 |
| C    | -1.66244600 | -3.40608600 | -1.49756100 |
| H    | -1.83188500 | -3.65633200 | -2.55442300 |
| H    | -1.64537700 | -4.37806400 | -0.97807100 |
| C    | -5.01170600 | -2.14125100 | -0.36722700 |
| C    | -4.21547200 | -3.00775800 | -1.16779400 |
| C    | -2.82964300 | -2.61702800 | -0.98118000 |
| C    | -2.86611700 | -1.54695900 | -0.12166000 |
| N    | -4.16500800 | -1.21855700 | 0.23914600  |
| H    | -4.29065700 | -0.86378100 | 1.20315000  |
| C    | -4.84109600 | -4.01357700 | -1.91880800 |
| C    | -6.39825600 | -2.27211400 | -0.29119700 |
| C    | -6.22627100 | -4.14139200 | -1.84975300 |
| H    | -6.72308300 | -4.91723800 | -2.42611100 |
| C    | -6.99548100 | -3.28409000 | -1.04106900 |
| H    | -8.07374400 | -3.41166400 | -1.00156800 |
| H    | -4.25581900 | -4.68703600 | -2.53995300 |

|    |             |             |             |
|----|-------------|-------------|-------------|
| H  | -6.98832500 | -1.60808500 | 0.33401800  |
| C  | 0.21715800  | -2.31592000 | -0.04358300 |
| C  | -0.44389100 | -2.63817300 | 1.11365100  |
| H  | -1.34317400 | -3.24289800 | 1.09732800  |
| H  | -0.02751000 | -2.44477500 | 2.09389700  |
| Pd | -1.43496400 | -0.53064400 | 0.72537200  |
| P  | -2.08216100 | 1.55963700  | -0.16208600 |
| C  | 0.76150900  | -3.82762000 | -1.96517300 |
| H  | 0.68303600  | -4.73969300 | -1.35694100 |
| H  | 0.46624800  | -4.10174700 | -2.98525900 |
| C  | 2.58276400  | -2.86878500 | -0.52908400 |
| H  | 2.39689900  | -3.72429900 | 0.14016300  |
| C  | 2.20978800  | -3.33513700 | -1.93859500 |
| H  | 2.35944800  | -2.52250800 | -2.65974500 |
| H  | 2.87962100  | -4.14753400 | -2.24562600 |
| C  | 1.73252600  | -0.47735900 | -0.93403800 |
| H  | 1.15176000  | 0.34096700  | -0.50537800 |
| H  | 2.77037400  | -0.15158900 | -1.03472500 |
| H  | 1.35249100  | -0.66370700 | -1.93842200 |
| C  | 2.10164200  | -1.32241500 | 1.40180200  |
| H  | 1.39243000  | -0.62188300 | 1.85003100  |
| H  | 2.11291200  | -2.21889800 | 2.03197300  |
| C  | 4.01643700  | -2.44715600 | -0.36652700 |
| C  | 3.51155100  | -0.69497800 | 1.42503500  |
| H  | 3.47755300  | 0.35338500  | 1.10244700  |
| H  | 3.89049700  | -0.67808900 | 2.45392300  |
| C  | 4.39080300  | -1.49327800 | 0.53413100  |
| C  | 5.22091500  | -2.87400500 | -1.01375300 |
| H  | 5.32393300  | -3.62242800 | -1.78735700 |
| C  | 6.25354600  | -2.14819200 | -0.46567400 |
| O  | 5.74135900  | -1.29279300 | 0.48823700  |
| C  | -2.24239500 | 1.61158200  | -2.05971700 |
| C  | -3.37240200 | 2.69324900  | 0.67119200  |
| C  | 1.22962600  | 2.13208100  | 2.03941900  |
| C  | 1.66809500  | 2.83726600  | 0.89305000  |
| C  | 2.94631300  | 3.39878000  | 0.80722000  |
| C  | 3.78903100  | 3.22712800  | 1.90037100  |
| C  | 3.37142500  | 2.52710900  | 3.05254000  |
| C  | 2.09920900  | 1.97934600  | 3.13351800  |
| C  | -0.11353700 | 1.71316500  | 1.77961600  |

|   |             |             |             |
|---|-------------|-------------|-------------|
| H | 3.26582000  | 3.94429000  | -0.07395900 |
| H | 4.79150100  | 3.64315700  | 1.86583300  |
| H | 4.06080200  | 2.41522700  | 3.88389300  |
| H | 1.77442100  | 1.43818800  | 4.01714500  |
| H | -0.74042600 | 1.14091800  | 2.45803400  |
| C | -0.47876200 | 2.17476400  | 0.51139800  |
| N | 0.62172700  | 2.85940800  | -0.03278300 |
| C | 0.70290100  | 3.70469000  | -1.18067800 |
| C | 1.50083100  | 3.31953900  | -2.26095300 |
| C | 0.08236400  | 4.95567200  | -1.17419500 |
| C | 1.63142700  | 4.16685800  | -3.36104100 |
| H | 2.00940000  | 2.36141200  | -2.22890500 |
| C | 0.21132900  | 5.79731200  | -2.27904400 |
| H | -0.49532400 | 5.25714900  | -0.30901300 |
| C | 0.97889600  | 5.40115800  | -3.37608500 |
| H | 2.24255100  | 3.86159500  | -4.20492200 |
| H | -0.28118500 | 6.76499400  | -2.27784200 |
| H | 1.07831000  | 6.05770900  | -4.23517500 |
| C | -3.44306700 | 0.72343900  | -2.46283500 |
| H | -4.39619700 | 1.07455100  | -2.07085400 |
| H | -3.50763900 | 0.74216400  | -3.55801500 |
| H | -3.30203500 | -0.31097400 | -2.15028300 |
| C | -2.43032300 | 3.00495600  | -2.67828700 |
| H | -2.44951300 | 2.89540800  | -3.76979200 |
| H | -3.38120600 | 3.45567300  | -2.38346100 |
| H | -1.62467000 | 3.69404900  | -2.43023300 |
| C | -0.99039400 | 0.93536300  | -2.63348300 |
| H | -0.07902100 | 1.49403600  | -2.43267600 |
| H | -0.88436100 | -0.06872500 | -2.22110700 |
| H | -1.10206900 | 0.85162300  | -3.72145600 |
| C | -4.77246400 | 2.40594200  | 0.10224300  |
| H | -4.88803800 | 2.76174500  | -0.92464700 |
| H | -5.01041800 | 1.33915200  | 0.13666300  |
| H | -5.50943900 | 2.93578400  | 0.71745700  |
| C | -3.00519200 | 4.17526200  | 0.48862500  |
| H | -3.78669900 | 4.78878600  | 0.95416100  |
| H | -2.06289700 | 4.40270400  | 0.99630500  |
| H | -2.92225000 | 4.47779300  | -0.55655300 |
| C | 7.66673000  | -2.18827700 | -0.75605900 |
| H | 7.89735400  | -2.92365900 | -1.52548700 |

|   |             |             |             |
|---|-------------|-------------|-------------|
| C | 8.69965900  | -1.48606900 | -0.24371700 |
| C | 10.09904800 | -1.74215400 | -0.74197400 |
| H | 10.54185300 | -0.82639600 | -1.15928900 |
| H | 10.75774200 | -2.05574400 | 0.08052700  |
| H | 10.12789800 | -2.51674800 | -1.51452000 |
| C | 8.59737900  | -0.42757000 | 0.82220400  |
| H | 9.00903000  | 0.52266800  | 0.45264000  |
| H | 7.57574700  | -0.25703400 | 1.15586000  |
| H | 9.20730500  | -0.70694800 | 1.69330000  |
| C | -2.98132900 | -1.04233200 | 5.08637300  |
| H | -2.40584600 | -1.94472500 | 5.32036000  |
| H | -2.52205800 | -0.21591400 | 5.64109100  |
| H | -4.01603500 | -1.17061800 | 5.41092800  |
| C | -2.90568900 | -0.75694400 | 3.58495600  |
| O | -3.98355700 | -0.67197500 | 2.94581300  |
| O | -1.72753900 | -0.60773000 | 3.11537600  |
| C | -3.39183900 | 2.38405100  | 2.17696200  |
| H | -2.42450300 | 2.58100800  | 2.64464900  |
| H | -4.12606900 | 3.05078600  | 2.64734300  |
| H | -3.68255900 | 1.35233200  | 2.38307800  |

## TS2A

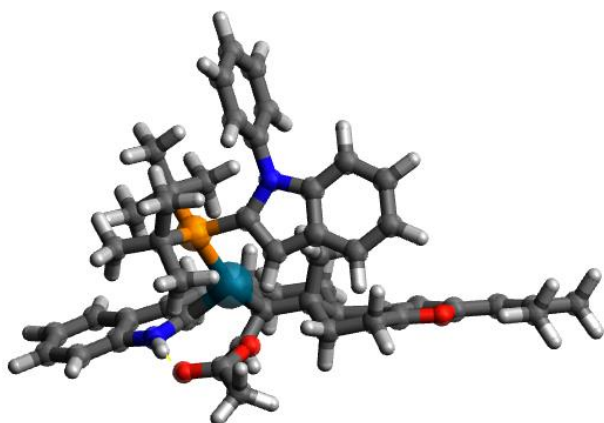

|                                              |                             |
|----------------------------------------------|-----------------------------|
| Zero-point correction=                       | 1.012937 (Hartree/Particle) |
| Thermal correction to Energy=                | 1.070410                    |
| Thermal correction to Enthalpy=              | 1.071355                    |
| Thermal correction to Gibbs Free Energy=     | 0.920389                    |
| Sum of electronic and zero-point Energies=   | -2782.692318                |
| Sum of electronic and thermal Energies=      | -2782.634844                |
| Sum of electronic and thermal Enthalpies=    | -2782.633900                |
| Sum of electronic and thermal Free Energies= | -2782.784866                |

| Cartesian Coordinates |             |             |             |
|-----------------------|-------------|-------------|-------------|
| Atom                  | X           | Y           | Z           |
| C                     | 1.95077100  | -1.46290300 | -0.32027200 |
| C                     | 0.24924100  | -2.44840500 | -2.00701800 |
| H                     | 0.18993600  | -1.47227400 | -2.50147400 |
| C                     | -1.10086300 | -3.17479200 | -2.26004500 |
| H                     | -1.47679100 | -2.84684200 | -3.23926300 |
| H                     | -0.90241400 | -4.25227500 | -2.38054500 |
| C                     | -3.87947500 | -3.44196700 | 0.25464900  |
| C                     | -3.41260200 | -3.67505200 | -1.08285900 |
| C                     | -2.14245300 | -3.02219800 | -1.19739100 |
| C                     | -1.91121400 | -2.42529900 | 0.03854300  |
| N                     | -2.94138500 | -2.68035000 | 0.91189500  |
| H                     | -2.87355900 | -2.38537200 | 1.91687900  |
| C                     | -4.20267600 | -4.43944500 | -1.96219200 |
| C                     | -5.10694500 | -3.94683600 | 0.70121100  |
| C                     | -5.41766200 | -4.93756100 | -1.51371200 |
| H                     | -6.03944000 | -5.52575900 | -2.18272600 |
| C                     | -5.86370000 | -4.69104400 | -0.19586200 |
| H                     | -6.82071200 | -5.09430500 | 0.12349000  |
| H                     | -3.86656200 | -4.63085500 | -2.97806400 |
| H                     | -5.44766000 | -3.76306400 | 1.71566200  |
| C                     | 0.60620500  | -2.18357800 | -0.54079600 |
| C                     | 0.02862500  | -3.05659600 | 0.42608100  |
| H                     | -0.27903000 | -4.06315500 | 0.16591700  |
| H                     | 0.25571800  | -2.90338700 | 1.47587200  |
| Pd                    | -0.89488000 | -0.73279200 | 0.26945800  |
| P                     | -2.47597800 | 1.11147600  | 0.20775800  |
| C                     | 1.38807000  | -3.23047100 | -2.70287100 |
| H                     | 1.41494400  | -4.24683000 | -2.28439600 |
| H                     | 1.15274300  | -3.33466500 | -3.76974900 |
| C                     | 3.03193400  | -2.38044600 | -1.01180000 |
| H                     | 2.92303900  | -3.37163400 | -0.54223000 |
| C                     | 2.75685000  | -2.57713900 | -2.50519400 |
| H                     | 2.81210900  | -1.61655900 | -3.03179400 |
| H                     | 3.53526000  | -3.21503700 | -2.94114600 |
| C                     | 1.94184400  | -0.05465500 | -0.96249700 |
| H                     | 1.37324700  | 0.64728000  | -0.34655600 |
| H                     | 2.95835600  | 0.33617900  | -1.05181200 |

|   |             |             |             |
|---|-------------|-------------|-------------|
| H | 1.50224900  | -0.05090100 | -1.96158200 |
| C | 2.33627800  | -1.34780400 | 1.17726900  |
| H | 1.53899500  | -0.87834800 | 1.75692400  |
| H | 2.45196400  | -2.36063300 | 1.58186000  |
| C | 4.40589500  | -1.85870200 | -0.69436100 |
| C | 3.66331800  | -0.59089000 | 1.39576400  |
| H | 3.51646100  | 0.49251500  | 1.28800700  |
| H | 4.01400500  | -0.75332800 | 2.42296400  |
| C | 4.65046900  | -1.08503600 | 0.40281100  |
| C | 5.66601000  | -2.01209500 | -1.35824400 |
| H | 5.87058800  | -2.56373100 | -2.26547500 |
| C | 6.59860100  | -1.31903300 | -0.62119300 |
| O | 5.97134800  | -0.74317100 | 0.46453100  |
| C | -3.11452600 | 1.23304700  | -1.57973300 |
| C | -3.78406500 | 1.65809400  | 1.47598800  |
| C | 1.01138600  | 2.66133600  | 1.47958600  |
| C | 0.75912800  | 3.62644100  | 0.47362300  |
| C | 1.66057300  | 4.65714900  | 0.18635500  |
| C | 2.84101900  | 4.69065100  | 0.92005200  |
| C | 3.11664000  | 3.73401300  | 1.92085200  |
| C | 2.21062600  | 2.72373100  | 2.21135300  |
| C | -0.10925000 | 1.77312900  | 1.49151400  |
| H | 1.44719000  | 5.39660900  | -0.57805200 |
| H | 3.56696400  | 5.47324300  | 0.71961500  |
| H | 4.05029600  | 3.79608900  | 2.47179500  |
| H | 2.41350400  | 1.99342400  | 2.98891800  |
| H | -0.23664900 | 0.91307000  | 2.14445500  |
| C | -1.01893500 | 2.19961200  | 0.52262800  |
| N | -0.48105900 | 3.34470800  | -0.09907900 |
| C | -1.07592500 | 4.26315300  | -1.01535900 |
| C | -0.62352300 | 4.30935500  | -2.33678700 |
| C | -2.02845600 | 5.18207200  | -0.56949900 |
| C | -1.17258300 | 5.23167200  | -3.22709300 |
| H | 0.15403400  | 3.62282900  | -2.65477400 |
| C | -2.58003900 | 6.09904000  | -1.46398200 |
| H | -2.33055800 | 5.16999700  | 0.46974500  |
| C | -2.16064800 | 6.11870500  | -2.79556000 |
| H | -0.82816500 | 5.25613600  | -4.25651800 |
| H | -3.33086300 | 6.80272500  | -1.11732600 |
| H | -2.59217200 | 6.83205300  | -3.49128500 |

|   |             |             |             |
|---|-------------|-------------|-------------|
| C | -4.00861600 | -0.00558200 | -1.81643700 |
| H | -4.94940000 | 0.04011400  | -1.26699800 |
| H | -4.25509600 | -0.05012900 | -2.88503500 |
| H | -3.49816900 | -0.93329900 | -1.55205700 |
| C | -3.90847900 | 2.49218400  | -1.95414200 |
| H | -4.20578900 | 2.41998600  | -3.00836400 |
| H | -4.82645900 | 2.57797100  | -1.36604200 |
| H | -3.33505800 | 3.40943800  | -1.83402700 |
| C | -1.88406900 | 1.07474900  | -2.49203800 |
| H | -1.15993200 | 1.87805000  | -2.36481500 |
| H | -1.37917500 | 0.12438800  | -2.29142800 |
| H | -2.21305000 | 1.07652900  | -3.53873600 |
| C | -5.09746700 | 0.90395000  | 1.20891800  |
| H | -5.61140100 | 1.26496900  | 0.31392000  |
| H | -4.93147900 | -0.17393600 | 1.11073600  |
| H | -5.77066100 | 1.06041600  | 2.06058100  |
| C | -4.01613400 | 3.17466400  | 1.47900400  |
| H | -4.80611600 | 3.41618700  | 2.20196600  |
| H | -3.10921800 | 3.69688100  | 1.79811900  |
| H | -4.32001900 | 3.56569700  | 0.50568900  |
| C | 8.01480900  | -1.15388300 | -0.84484800 |
| H | 8.34254900  | -1.67653400 | -1.74233900 |
| C | 8.95306100  | -0.48172300 | -0.14458900 |
| C | 10.38371800 | -0.48122900 | -0.61935400 |
| H | 10.73502100 | 0.54330100  | -0.80852100 |
| H | 11.05219700 | -0.89963600 | 0.14671000  |
| H | 10.51490800 | -1.06098000 | -1.53827800 |
| C | 8.71087700  | 0.30212900  | 1.11783500  |
| H | 9.01765500  | 1.34874000  | 0.97836700  |
| H | 7.67037400  | 0.28547900  | 1.43586100  |
| H | 9.33244200  | -0.09291500 | 1.93419300  |
| C | -0.96414400 | -1.09255800 | 5.15217600  |
| H | 0.10038500  | -1.24557100 | 5.35251700  |
| H | -1.18898900 | -0.03662300 | 5.35210100  |
| H | -1.57067900 | -1.70554800 | 5.82310000  |
| C | -1.28906400 | -1.39029300 | 3.68614500  |
| O | -2.41236000 | -1.91318600 | 3.44554200  |
| O | -0.41790600 | -1.03725000 | 2.83226100  |
| C | -3.26056400 | 1.23669500  | 2.86029600  |
| H | -2.29268300 | 1.69412800  | 3.08442100  |

|   |             |            |            |
|---|-------------|------------|------------|
| H | -3.97481200 | 1.58126700 | 3.61950200 |
| H | -3.16297600 | 0.15294900 | 2.95015100 |

### CP5A

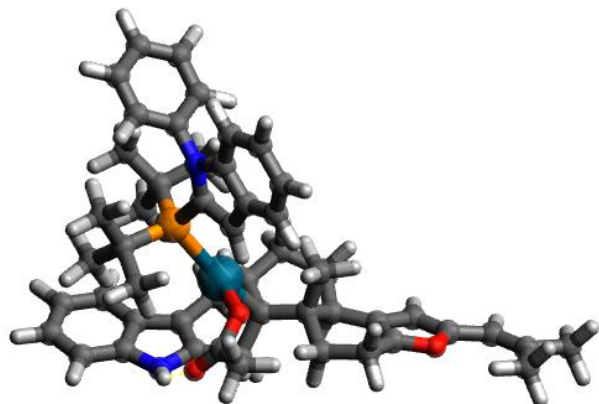

|                                              |                             |
|----------------------------------------------|-----------------------------|
| Zero-point correction=                       | 1.014970 (Hartree/Particle) |
| Thermal correction to Energy=                | 1.072450                    |
| Thermal correction to Enthalpy=              | 1.073394                    |
| Thermal correction to Gibbs Free Energy=     | 0.922628                    |
| Sum of electronic and zero-point Energies=   | -2782.749094                |
| Sum of electronic and thermal Energies=      | -2782.691614                |
| Sum of electronic and thermal Enthalpies=    | -2782.690670                |
| Sum of electronic and thermal Free Energies= | -2782.841436                |

#### Cartesian Coordinates

| Atom | X           | Y          | Z           |
|------|-------------|------------|-------------|
| C    | -2.89052500 | 0.33739600 | 0.00479000  |
| C    | -1.29260200 | 1.72454300 | -1.47685500 |
| H    | -0.17897900 | 1.32057500 | -1.50184200 |
| C    | -1.04456000 | 3.23238600 | -1.78820000 |
| H    | -0.45679900 | 3.31170800 | -2.70929100 |
| H    | -2.02429900 | 3.68754700 | -2.00047600 |
| C    | 1.08828200  | 4.69543400 | 0.94788900  |
| C    | 0.85862900  | 4.61980000 | -0.46329300 |
| C    | -0.35787300 | 3.86794300 | -0.62816700 |
| C    | -0.79167600 | 3.53098200 | 0.62947500  |
| N    | 0.04087000  | 4.05271300 | 1.59441500  |
| H    | 0.12399400  | 3.55737000 | 2.48291600  |
| C    | 1.79353000  | 5.19891200 | -1.33545500 |
| C    | 2.21540400  | 5.32517600 | 1.47833900  |
| C    | 2.92392700  | 5.81263700 | -0.80465500 |



|    |             |             |             |
|----|-------------|-------------|-------------|
| H  | 3.65617100  | 6.25757200  | -1.47281900 |
| C  | 3.13310200  | 5.87561500  | 0.58712400  |
| H  | 4.02394400  | 6.36355000  | 0.97202700  |
| H  | 1.64119000  | 5.16056400  | -2.41110000 |
| H  | 2.37531100  | 5.37006600  | 2.55176900  |
| C  | -1.79804400 | 1.41562100  | -0.08899000 |
| C  | -1.94475900 | 2.61625700  | 0.85628200  |
| H  | -2.89738200 | 3.13859800  | 0.65465300  |
| H  | -1.97205100 | 2.28384000  | 1.89216800  |
| Pd | 0.15513000  | 0.73861000  | 0.20533400  |
| P  | 2.49766500  | 0.04217500  | -0.11425100 |
| C  | -1.95146000 | 0.96532900  | -2.65123700 |
| H  | -1.77834600 | 1.54768600  | -3.56272900 |
| H  | -1.42154200 | 0.02233000  | -2.80323000 |
| C  | -3.97070800 | 0.78436600  | -1.04104500 |
| H  | -4.15624700 | 1.85210100  | -0.84503200 |
| C  | -3.46194200 | 0.66665300  | -2.48820500 |
| H  | -3.66091400 | -0.34604000 | -2.85419400 |
| H  | -4.04984200 | 1.34121300  | -3.12044600 |
| C  | -2.34289600 | -1.07630800 | -0.29857400 |
| H  | -1.77965200 | -1.43893500 | 0.56493100  |
| H  | -3.16186700 | -1.77269400 | -0.50370300 |
| H  | -1.66833200 | -1.10114700 | -1.15596000 |
| C  | -3.53901200 | 0.29634100  | 1.41331100  |
| H  | -2.75891600 | 0.09113900  | 2.14978600  |
| H  | -3.97197600 | 1.27455300  | 1.64640900  |
| C  | -5.25661400 | 0.03725600  | -0.82249800 |
| C  | -4.66383600 | -0.75245900 | 1.53411700  |
| H  | -4.24781900 | -1.76670500 | 1.61482400  |
| H  | -5.23524200 | -0.57993100 | 2.45480600  |
| C  | -5.53078700 | -0.62919800 | 0.33548500  |
| C  | -6.39283600 | -0.16504100 | -1.67247700 |
| H  | -6.54104600 | 0.21431200  | -2.67428000 |
| C  | -7.28677900 | -0.94363300 | -0.97486100 |
| O  | -6.75433500 | -1.23306200 | 0.26464200  |
| C  | 2.98708500  | 0.41012100  | -1.92091700 |
| C  | 3.74892900  | 0.79662700  | 1.10202700  |
| C  | 1.95495100  | -3.60439200 | 1.46316700  |
| C  | 3.12685100  | -3.91251900 | 0.72934000  |
| C  | 3.72542000  | -5.17731100 | 0.77428400  |

|   |            |             |             |
|---|------------|-------------|-------------|
| C | 3.13958400 | -6.12830200 | 1.60114900  |
| C | 1.98348200 | -5.83675300 | 2.35740900  |
| C | 1.38606500 | -4.58612300 | 2.29408600  |
| C | 1.61084300 | -2.25547900 | 1.13858800  |
| H | 4.61353700 | -5.40110500 | 0.19263600  |
| H | 3.58240200 | -7.11804500 | 1.66789500  |
| H | 1.55746100 | -6.60717400 | 2.99353000  |
| H | 0.49197200 | -4.36394300 | 2.87002600  |
| H | 0.79928200 | -1.67896200 | 1.56163700  |
| C | 2.54487800 | -1.75895500 | 0.24580100  |
| N | 3.50131400 | -2.78393900 | 0.00787700  |
| C | 4.49091600 | -2.90944700 | -1.01381800 |
| C | 4.11509800 | -3.34966400 | -2.28668900 |
| C | 5.84025700 | -2.70865300 | -0.71597300 |
| C | 5.07745400 | -3.50630800 | -3.28265800 |
| H | 3.07098100 | -3.57062800 | -2.48039600 |
| C | 6.80280100 | -2.87160200 | -1.71330900 |
| H | 6.12422700 | -2.41963100 | 0.28811700  |
| C | 6.42205200 | -3.25521200 | -3.00022100 |
| H | 4.77903300 | -3.83207800 | -4.27465300 |
| H | 7.84993900 | -2.69986200 | -1.48258400 |
| H | 7.17212300 | -3.37428500 | -3.77647100 |
| C | 2.61263900 | 1.87255000  | -2.24500100 |
| H | 3.27463200 | 2.59560500  | -1.76927400 |
| H | 2.68758500 | 2.01777400  | -3.33044800 |
| H | 1.59660500 | 2.12358000  | -1.93945700 |
| C | 4.46705600 | 0.22497700  | -2.29035100 |
| H | 4.59591200 | 0.45069200  | -3.35708300 |
| H | 5.10591000 | 0.91604800  | -1.73427300 |
| H | 4.82697600 | -0.78601400 | -2.12230200 |
| C | 2.09899300 | -0.50504900 | -2.78487300 |
| H | 2.29892800 | -1.56172700 | -2.60665200 |
| H | 1.03595000 | -0.32798400 | -2.58799100 |
| H | 2.28582500 | -0.29776100 | -3.84594000 |
| C | 4.00199300 | 2.26815900  | 0.73956800  |
| H | 4.63374000 | 2.37650300  | -0.14612100 |
| H | 3.07238200 | 2.81843500  | 0.57564900  |
| H | 4.52277200 | 2.75524400  | 1.57296900  |
| C | 5.07215200 | 0.02535600  | 1.17464200  |
| H | 5.74316000 | 0.52925900  | 1.88251400  |

|   |              |             |             |
|---|--------------|-------------|-------------|
| H | 4.90875400   | -0.99314400 | 1.53773500  |
| H | 5.58252300   | -0.02752300 | 0.21054600  |
| C | -8.58640500  | -1.43391900 | -1.36748000 |
| H | -8.84796900  | -1.11349300 | -2.37490500 |
| C | -9.48625800  | -2.19393800 | -0.70799600 |
| C | -10.78689500 | -2.56172900 | -1.37520400 |
| H | -10.89866900 | -3.65333000 | -1.44318500 |
| H | -11.64453400 | -2.19991600 | -0.79020900 |
| H | -10.86532700 | -2.14810100 | -2.38537100 |
| C | -9.32094300  | -2.73766700 | 0.68614000  |
| H | -9.38455600  | -3.83523500 | 0.67453400  |
| H | -8.37737200  | -2.45063400 | 1.14579600  |
| H | -10.14317000 | -2.39006700 | 1.32786900  |
| C | -0.42793000  | -0.22215600 | 4.49386400  |
| H | -1.33428900  | -0.82808300 | 4.39202800  |
| H | 0.41492100   | -0.91560800 | 4.59583700  |
| H | -0.49311900  | 0.40243500  | 5.38661800  |
| C | -0.21989800  | 0.63775900  | 3.24949400  |
| O | -0.01483200  | 1.85668200  | 3.36632000  |
| O | -0.27044900  | -0.03906000 | 2.15171300  |
| C | 3.07016100   | 0.74877100  | 2.48275800  |
| H | 2.76292800   | -0.26736500 | 2.74950200  |
| H | 3.78524800   | 1.09536200  | 3.24008200  |
| H | 2.19083300   | 1.39403800  | 2.52281300  |

### TS3A

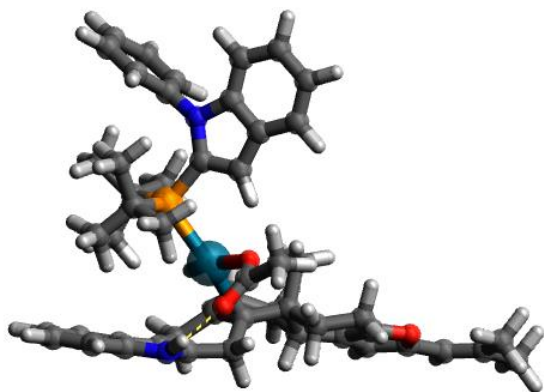

|                                          |                             |
|------------------------------------------|-----------------------------|
| Zero-point correction=                   | 1.011693 (Hartree/Particle) |
| Thermal correction to Energy=            | 1.068961                    |
| Thermal correction to Enthalpy=          | 1.069905                    |
| Thermal correction to Gibbs Free Energy= | 0.920252                    |

Sum of electronic and zero-point Energies= -2782.744418  
 Sum of electronic and thermal Energies= -2782.687151  
 Sum of electronic and thermal Enthalpies= -2782.686207  
 Sum of electronic and thermal Free Energies= -2782.835859

| Cartesian Coordinates |             |             |             |
|-----------------------|-------------|-------------|-------------|
| Atom                  | X           | Y           | Z           |
| C                     | -2.91725300 | 0.48434200  | 0.01216200  |
| C                     | -1.35838800 | 1.85050000  | -1.44281100 |
| H                     | 0.14009000  | 1.20265200  | -1.43048100 |
| C                     | -0.86311400 | 3.26686900  | -1.78858800 |
| H                     | -0.20249300 | 3.22339600  | -2.66128900 |
| H                     | -1.75645900 | 3.82776800  | -2.11396700 |
| C                     | 1.26609600  | 4.67544700  | 0.97440500  |
| C                     | 1.05628100  | 4.58784000  | -0.43933000 |
| C                     | -0.18945900 | 3.88936900  | -0.61319100 |
| C                     | -0.65882300 | 3.59274000  | 0.64047700  |
| N                     | 0.18159400  | 4.08977800  | 1.61279500  |
| H                     | 0.23401000  | 3.58702400  | 2.50259700  |
| C                     | 2.03057300  | 5.10948100  | -1.30493600 |
| C                     | 2.41087300  | 5.26475400  | 1.51370400  |
| C                     | 3.17735300  | 5.68338700  | -0.76443300 |
| H                     | 3.93945000  | 6.08467300  | -1.42685800 |
| C                     | 3.36524900  | 5.76173300  | 0.62970300  |
| H                     | 4.26966300  | 6.21799300  | 1.02185900  |
| H                     | 1.89466400  | 5.06012200  | -2.38236600 |
| H                     | 2.55458700  | 5.32061500  | 2.58887500  |
| C                     | -1.84309100 | 1.57910600  | -0.12808200 |
| C                     | -1.85061100 | 2.73247300  | 0.88235500  |
| H                     | -2.78094400 | 3.31387300  | 0.75495000  |
| H                     | -1.84505200 | 2.35712900  | 1.90333200  |
| Pd                    | 0.21084200  | 0.78579000  | 0.09624100  |
| P                     | 2.44752700  | -0.00074700 | -0.22028200 |
| C                     | -1.91805500 | 1.06099600  | -2.63015200 |
| H                     | -1.77015300 | 1.66546500  | -3.53117600 |
| H                     | -1.32666700 | 0.15648600  | -2.78410900 |
| C                     | -3.97960900 | 0.85709600  | -1.07823000 |
| H                     | -4.18316400 | 1.93219500  | -0.94862300 |
| C                     | -3.41529200 | 0.66019200  | -2.49330000 |
| H                     | -3.52873200 | -0.39087200 | -2.77712500 |

|   |             |             |             |
|---|-------------|-------------|-------------|
| H | -4.02087700 | 1.23765900  | -3.19999600 |
| C | -2.34989100 | -0.93589000 | -0.21352700 |
| H | -1.77162600 | -1.23758000 | 0.66285600  |
| H | -3.16094100 | -1.65425900 | -0.36781300 |
| H | -1.68559900 | -0.99819400 | -1.07760900 |
| C | -3.58476200 | 0.50987800  | 1.41019000  |
| H | -2.81718700 | 0.33748600  | 2.16839600  |
| H | -4.01737500 | 1.49969100  | 1.59131100  |
| C | -5.25823600 | 0.10236100  | -0.85073400 |
| C | -4.71026200 | -0.53468400 | 1.56444100  |
| H | -4.29136500 | -1.53957100 | 1.71614900  |
| H | -5.30396700 | -0.31099500 | 2.45958300  |
| C | -5.55050500 | -0.49337800 | 0.34102200  |
| C | -6.37125500 | -0.16950400 | -1.71160700 |
| H | -6.50107800 | 0.14383300  | -2.73846400 |
| C | -7.27078400 | -0.91583400 | -0.98642300 |
| O | -6.76377600 | -1.11852900 | 0.28066700  |
| C | 2.97694600  | 0.25196300  | -2.03713700 |
| C | 3.71212700  | 0.77737200  | 0.96884900  |
| C | 1.78247800  | -3.53079200 | 1.56432600  |
| C | 2.94377400  | -3.91954500 | 0.85315500  |
| C | 3.50291300  | -5.19719300 | 0.97769700  |
| C | 2.88821500  | -6.07563200 | 1.86178000  |
| C | 1.74221000  | -5.70182300 | 2.59719700  |
| C | 1.18364100  | -4.43996400 | 2.45472000  |
| C | 1.48010400  | -2.19465100 | 1.15783300  |
| H | 4.38325100  | -5.48475700 | 0.41259300  |
| H | 3.30024400  | -7.07246700 | 1.99094700  |
| H | 1.29347800  | -6.41730500 | 3.28010900  |
| H | 0.29764700  | -4.15367100 | 3.01459800  |
| H | 0.69208600  | -1.56723100 | 1.55241900  |
| C | 2.42825200  | -1.78236600 | 0.23773100  |
| N | 3.35247000  | -2.85003900 | 0.06348800  |
| C | 4.34823100  | -3.06996500 | -0.93578200 |
| C | 3.97246500  | -3.55751600 | -2.19106700 |
| C | 5.70075300  | -2.91425900 | -0.62432100 |
| C | 4.94213900  | -3.80519200 | -3.16122000 |
| H | 2.92288200  | -3.74324500 | -2.39161100 |
| C | 6.67016200  | -3.16932100 | -1.59517200 |
| H | 5.98143900  | -2.58698900 | 0.36905900  |

|   |              |             |             |
|---|--------------|-------------|-------------|
| C | 6.29207000   | -3.59930400 | -2.86821900 |
| H | 4.64472700   | -4.16726600 | -4.14084600 |
| H | 7.72031200   | -3.03258700 | -1.35497100 |
| H | 7.04775400   | -3.78974300 | -3.62452900 |
| C | 2.67876800   | 1.70378400  | -2.46739400 |
| H | 3.31262400   | 2.43712900  | -1.96967000 |
| H | 2.85827500   | 1.78350000  | -3.54722400 |
| H | 1.64354500   | 1.98524100  | -2.27384400 |
| C | 4.46019900   | -0.01407400 | -2.34597400 |
| H | 4.62212000   | 0.11467700  | -3.42376400 |
| H | 5.10902900   | 0.70092700  | -1.83394400 |
| H | 4.78092300   | -1.01773200 | -2.08406400 |
| C | 2.07867800   | -0.67764900 | -2.87338500 |
| H | 2.22508400   | -1.72847500 | -2.62359600 |
| H | 1.02040900   | -0.43922200 | -2.72439600 |
| H | 2.31138800   | -0.54578000 | -3.93733200 |
| C | 4.04472000   | 2.20862600  | 0.52085200  |
| H | 4.69318800   | 2.23050200  | -0.35883300 |
| H | 3.14685800   | 2.79371100  | 0.31086800  |
| H | 4.57768600   | 2.71832700  | 1.33201900  |
| C | 4.99359800   | -0.05440000 | 1.10724900  |
| H | 5.67835200   | 0.45975200  | 1.79393900  |
| H | 4.77581800   | -1.03955400 | 1.52893200  |
| H | 5.51424400   | -0.19017700 | 0.15709100  |
| C | -8.55413100  | -1.44921200 | -1.37640500 |
| H | -8.79668800  | -1.19604100 | -2.40744200 |
| C | -9.45845200  | -2.18028200 | -0.69083800 |
| C | -10.73828700 | -2.60810900 | -1.36247000 |
| H | -10.83349000 | -3.70337400 | -1.36502100 |
| H | -11.61393000 | -2.22384700 | -0.82003500 |
| H | -10.79921200 | -2.25882300 | -2.39782100 |
| C | -9.31809300  | -2.63384800 | 0.73783200  |
| H | -9.37005500  | -3.73064200 | 0.79359500  |
| H | -8.38799100  | -2.30755900 | 1.19873500  |
| H | -10.15782500 | -2.25655500 | 1.33882700  |
| C | -0.40046500  | -0.16822000 | 4.45274500  |
| H | -1.33041200  | -0.73357600 | 4.32815500  |
| H | 0.41472200   | -0.89912500 | 4.51056300  |
| H | -0.43646800  | 0.40991300  | 5.37797000  |
| C | -0.17175400  | 0.74489600  | 3.24913400  |

|   |             |             |            |
|---|-------------|-------------|------------|
| O | 0.04708000  | 1.95557600  | 3.43259400 |
| O | -0.22570400 | 0.12667600  | 2.12096500 |
| C | 3.01895800  | 0.84999500  | 2.34001600 |
| H | 2.66054500  | -0.13044100 | 2.66773800 |
| H | 3.74345100  | 1.21126600  | 3.08111000 |
| H | 2.17080700  | 1.53601800  | 2.32990000 |

### CP6A

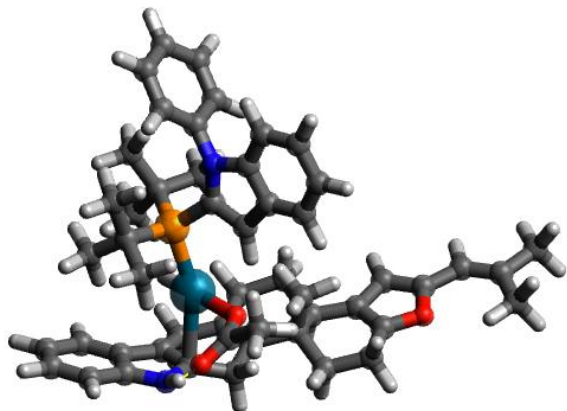

|                                              |                             |
|----------------------------------------------|-----------------------------|
| Zero-point correction=                       | 1.012299 (Hartree/Particle) |
| Thermal correction to Energy=                | 1.070193                    |
| Thermal correction to Enthalpy=              | 1.071138                    |
| Thermal correction to Gibbs Free Energy=     | 0.917415                    |
| Sum of electronic and zero-point Energies=   | -2782.759381                |
| Sum of electronic and thermal Energies=      | -2782.701486                |
| Sum of electronic and thermal Enthalpies=    | -2782.700542                |
| Sum of electronic and thermal Free Energies= | -2782.854265                |

#### Cartesian Coordinates

| Atom | X           | Y          | Z           |
|------|-------------|------------|-------------|
| C    | -3.14892400 | 1.52997000 | 0.06594500  |
| C    | -1.60331000 | 2.76607300 | -1.48179300 |
| H    | 1.29095300  | 1.72225400 | -1.30351000 |
| C    | -0.48725300 | 3.75331300 | -1.79109000 |
| H    | 0.04548900  | 3.43880000 | -2.69717300 |
| H    | -0.92653400 | 4.73608600 | -2.03552900 |
| C    | 2.10901800  | 4.42054400 | 0.85179600  |
| C    | 1.78378100  | 4.44034600 | -0.53667100 |
| C    | 0.45725100  | 3.88577600 | -0.64175000 |
| C    | 0.03997600  | 3.58312100 | 0.65153600  |
| N    | 1.01573900  | 3.96148200 | 1.56601700  |

|    |             |             |             |
|----|-------------|-------------|-------------|
| H  | 1.12371900  | 3.43154500  | 2.45513500  |
| C  | 2.73920000  | 4.87210600  | -1.46798700 |
| C  | 3.38376500  | 4.77098700  | 1.30716500  |
| C  | 3.99810800  | 5.24681500  | -1.01034200 |
| H  | 4.75038700  | 5.58465000  | -1.71736100 |
| C  | 4.31663100  | 5.18722700  | 0.36200400  |
| H  | 5.31178600  | 5.47543400  | 0.68900500  |
| H  | 2.50339100  | 4.90105800  | -2.52867000 |
| H  | 3.62976100  | 4.72208800  | 2.36343200  |
| C  | -2.02980300 | 2.53085400  | -0.22385700 |
| C  | -1.36789200 | 3.19704900  | 0.97889100  |
| H  | -1.93699300 | 4.09251700  | 1.27891700  |
| H  | -1.37244100 | 2.52213400  | 1.83700500  |
| Pd | 0.91594100  | 1.30134600  | 0.10687900  |
| P  | 2.37237000  | -0.37291300 | -0.50845300 |
| C  | -2.18376000 | 2.10254800  | -2.71142300 |
| H  | -2.64044900 | 2.88304600  | -3.34130200 |
| H  | -1.35709200 | 1.69565800  | -3.31148100 |
| C  | -4.04382800 | 1.40436900  | -1.20457800 |
| H  | -4.41835700 | 2.42093200  | -1.40924800 |
| C  | -3.21281300 | 1.00416100  | -2.42099500 |
| H  | -2.71383500 | 0.04696800  | -2.23467600 |
| H  | -3.85689200 | 0.85611800  | -3.29556700 |
| C  | -2.49217100 | 0.18261000  | 0.45605100  |
| H  | -1.93957200 | 0.28124500  | 1.39402500  |
| H  | -3.23700500 | -0.61173100 | 0.56220900  |
| H  | -1.76466000 | -0.13008900 | -0.29808800 |
| C  | -4.06591400 | 2.01031500  | 1.22620100  |
| H  | -3.47481100 | 2.22253700  | 2.12110400  |
| H  | -4.54245000 | 2.95255200  | 0.92597100  |
| C  | -5.22873900 | 0.52970900  | -0.91297800 |
| C  | -5.16353900 | 0.98621400  | 1.60072600  |
| H  | -4.74533500 | 0.19631600  | 2.24118300  |
| H  | -5.94571100 | 1.47809200  | 2.19340700  |
| C  | -5.71758900 | 0.39970400  | 0.35339500  |
| C  | -6.07657400 | -0.26764500 | -1.74635600 |
| H  | -6.00272600 | -0.41201600 | -2.81551000 |
| C  | -7.02764800 | -0.83686700 | -0.93034500 |
| O  | -6.80573400 | -0.42707500 | 0.36841300  |
| C  | 2.43262900  | -0.64795000 | -2.39765600 |



|   |             |             |             |
|---|-------------|-------------|-------------|
| C | 4.03680800  | 0.20206300  | 0.20678700  |
| C | 1.06625200  | -3.20230700 | 2.01671400  |
| C | 2.03309700  | -3.99422300 | 1.35246900  |
| C | 2.28691200  | -5.32169700 | 1.71738000  |
| C | 1.57263300  | -5.83123800 | 2.79522600  |
| C | 0.62233800  | -5.05014600 | 3.48810400  |
| C | 0.36083000  | -3.74206700 | 3.10709900  |
| C | 1.04419300  | -1.93662700 | 1.35201300  |
| H | 3.01550800  | -5.92354800 | 1.18460000  |
| H | 1.75125000  | -6.85468000 | 3.11257100  |
| H | 0.08793300  | -5.48557200 | 4.32727100  |
| H | -0.37570200 | -3.14144300 | 3.63265100  |
| H | 0.46831800  | -1.06723800 | 1.64057600  |
| C | 1.96853500  | -1.95661800 | 0.32664600  |
| N | 2.60645100  | -3.23510400 | 0.33423100  |
| C | 3.29383900  | -3.92641500 | -0.71378000 |
| C | 2.55507000  | -4.52449500 | -1.74035500 |
| C | 4.67644800  | -4.11014000 | -0.65494800 |
| C | 3.20680000  | -5.22479900 | -2.75311700 |
| H | 1.47396100  | -4.43977900 | -1.72969900 |
| C | 5.32701900  | -4.81687700 | -1.66806100 |
| H | 5.23394200  | -3.69616200 | 0.17555400  |
| C | 4.59688000  | -5.36001900 | -2.72585100 |
| H | 2.62966200  | -5.67236900 | -3.55672300 |
| H | 6.40461800  | -4.94433000 | -1.62652200 |
| H | 5.10633200  | -5.90303500 | -3.51633600 |
| C | 2.36259900  | 0.68190600  | -3.17884800 |
| H | 3.10881600  | 1.41165400  | -2.85979000 |
| H | 2.53944800  | 0.46045300  | -4.23890700 |
| H | 1.37646800  | 1.14528200  | -3.09820500 |
| C | 3.69434200  | -1.38581000 | -2.88072100 |
| H | 3.56789400  | -1.64781200 | -3.93833000 |
| H | 4.57596800  | -0.74224100 | -2.80681000 |
| H | 3.89449400  | -2.30495200 | -2.33858500 |
| C | 1.15438800  | -1.43731500 | -2.73503900 |
| H | 1.14417000  | -2.42732100 | -2.28057900 |
| H | 0.26476800  | -0.89655200 | -2.39288900 |
| H | 1.08245100  | -1.56002300 | -3.82285700 |
| C | 4.52885900  | 1.43092300  | -0.57505500 |
| H | 4.87503900  | 1.16962400  | -1.57968200 |

|   |              |             |             |
|---|--------------|-------------|-------------|
| H | 3.75645000   | 2.20082900  | -0.65439600 |
| H | 5.37610500   | 1.87507300  | -0.03924200 |
| C | 5.10831500   | -0.89467800 | 0.22484900  |
| H | 6.03830400   | -0.47419800 | 0.62779500  |
| H | 4.80380600   | -1.71512800 | 0.87880200  |
| H | 5.32654900   | -1.29884300 | -0.76510800 |
| C | -8.11697700  | -1.72323000 | -1.26274900 |
| H | -8.14417000  | -1.94151200 | -2.32942000 |
| C | -9.06388500  | -2.29809100 | -0.49112000 |
| C | -10.09739600 | -3.19750200 | -1.11972700 |
| H | -10.06226800 | -4.20461300 | -0.67992400 |
| H | -11.11287500 | -2.81719600 | -0.93779700 |
| H | -9.95917100  | -3.29373800 | -2.20114500 |
| C | -9.20288300  | -2.12782000 | 0.99829500  |
| H | -9.14265500  | -3.10500600 | 1.49875100  |
| H | -8.44443200  | -1.47370700 | 1.42375100  |
| H | -10.19414800 | -1.71940000 | 1.24236600  |
| C | 0.50469400   | 0.06190500  | 4.38964700  |
| H | -0.54218200  | -0.25975200 | 4.40301600  |
| H | 1.11014100   | -0.82066000 | 4.15057100  |
| H | 0.79289800   | 0.44297200  | 5.37108300  |
| C | 0.71140200   | 1.11977400  | 3.30956300  |
| O | 1.30992700   | 2.17482400  | 3.60165700  |
| O | 0.23042100   | 0.80949100  | 2.15612200  |
| C | 3.75095000   | 0.61966500  | 1.66300500  |
| H | 3.29069800   | -0.19228000 | 2.23464700  |
| H | 4.70113300   | 0.87849600  | 2.14678300  |
| H | 3.09277800   | 1.48893100  | 1.72210900  |

### AgOAc

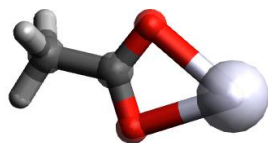

|                                            |                             |
|--------------------------------------------|-----------------------------|
| Zero-point correction=                     | 0.050503 (Hartree/Particle) |
| Thermal correction to Energy=              | 0.056745                    |
| Thermal correction to Enthalpy=            | 0.057689                    |
| Thermal correction to Gibbs Free Energy=   | 0.017233                    |
| Sum of electronic and zero-point Energies= | -374.214968                 |
| Sum of electronic and thermal Energies=    | -374.208725                 |
| Sum of electronic and thermal Enthalpies=  | -374.207781                 |

Sum of electronic and thermal Free Energies= -374.248238

| Cartesian Coordinates |             |             |             |
|-----------------------|-------------|-------------|-------------|
| Atom                  | X           | Y           | Z           |
| C                     | -1.51872900 | 0.00951800  | -0.00021800 |
| O                     | -0.92288100 | 1.12905700  | -0.00011600 |
| O                     | -0.92359400 | -1.11289100 | -0.00005100 |
| C                     | -3.04086000 | -0.00357300 | -0.00002900 |
| H                     | -3.39697100 | -0.54743100 | -0.88050700 |
| H                     | -3.39665600 | -0.54394700 | 0.88274700  |
| H                     | -3.44058800 | 1.01099000  | -0.00184200 |
| Ag                    | 1.11411800  | -0.00180000 | 0.00005100  |

### AgBr

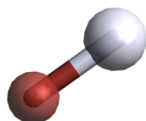

Zero-point correction= 0.000528 (Hartree/Particle)  
Thermal correction to Energy= 0.003401  
Thermal correction to Enthalpy= 0.004345  
Thermal correction to Gibbs Free Energy= -0.024905  
Sum of electronic and zero-point Energies= -2717.219172  
Sum of electronic and thermal Energies= -2717.216299  
Sum of electronic and thermal Enthalpies= -2717.215355  
Sum of electronic and thermal Free Energies= -2717.244605

| Cartesian Coordinates |            |            |             |
|-----------------------|------------|------------|-------------|
| Atom                  | X          | Y          | Z           |
| Br                    | 0.00000000 | 0.00000000 | -1.40985700 |
| Ag                    | 0.00000000 | 0.00000000 | 1.04989300  |

### CP3B

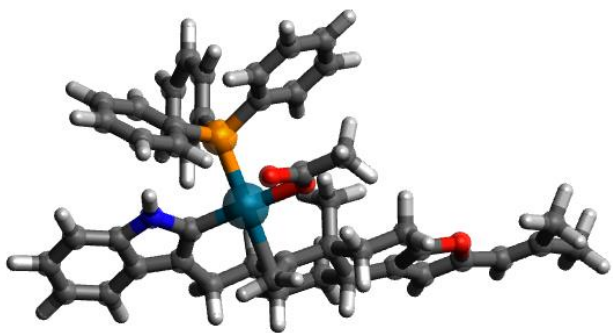

Zero-point correction= 0.841371 (Hartree/Particle)  
 Thermal correction to Energy= 0.890795  
 Thermal correction to Enthalpy= 0.891739  
 Thermal correction to Gibbs Free Energy= 0.755718  
 Sum of electronic and zero-point Energies= -2567.886079  
 Sum of electronic and thermal Energies= -2567.836655  
 Sum of electronic and thermal Enthalpies= -2567.835711  
 Sum of electronic and thermal Free Energies= -2567.971732

Cartesian Coordinates

| Atom | X           | Y           | Z           |
|------|-------------|-------------|-------------|
| C    | -2.41101900 | -0.97835600 | -0.60479100 |
| C    | -0.65884600 | -2.75778800 | 0.09351200  |
| H    | -0.40713300 | -2.19751500 | 1.00253200  |
| C    | 0.56689800  | -3.60212000 | -0.28420800 |
| H    | 0.66355500  | -4.37675500 | 0.48895500  |
| H    | 0.33739000  | -4.15619000 | -1.20879800 |
| C    | 4.17251000  | -2.61402000 | -0.53441200 |
| C    | 3.15643900  | -3.58911900 | -0.33822000 |
| C    | 1.88763200  | -2.90300500 | -0.40920500 |
| C    | 2.15210700  | -1.56395700 | -0.64379900 |
| N    | 3.53478100  | -1.40397000 | -0.70123100 |
| H    | 3.99395100  | -0.54414600 | -0.95643800 |
| C    | 3.53484600  | -4.92553200 | -0.12821600 |
| C    | 5.53188400  | -2.93371600 | -0.52550100 |
| C    | 4.88756500  | -5.25066400 | -0.11535400 |
| H    | 5.19043800  | -6.28146400 | 0.04732000  |
| C    | 5.87639100  | -4.26568500 | -0.31249800 |
| H    | 6.92471200  | -4.55057700 | -0.29735100 |
| H    | 2.78290200  | -5.69669500 | 0.01915200  |
| H    | 6.28896500  | -2.16841500 | -0.67573100 |
| C    | -1.11830800 | -1.73755300 | -0.95220000 |

|    |              |             |             |
|----|--------------|-------------|-------------|
| C  | -0.50634300  | -1.62370900 | -2.16947800 |
| H  | 0.30538500   | -2.28211200 | -2.45700000 |
| H  | -0.90192500  | -0.97774200 | -2.94395500 |
| Pd | 0.89284000   | -0.03680000 | -0.93651300 |
| P  | 2.13760300   | 1.32543200  | 0.44724700  |
| C  | -1.81574300  | -3.72007200 | 0.45924000  |
| H  | -1.99537200  | -4.38644000 | -0.39663700 |
| H  | -1.48324700  | -4.35590100 | 1.28820200  |
| C  | -3.50860600  | -2.07219800 | -0.33016300 |
| H  | -3.54665300  | -2.69565700 | -1.23884900 |
| C  | -3.11623600  | -3.00501000 | 0.81399600  |
| H  | -3.01147100  | -2.43971500 | 1.74793400  |
| H  | -3.91032300  | -3.74260900 | 0.98200500  |
| C  | -2.18349300  | -0.08321100 | 0.63891300  |
| H  | -1.62793900  | 0.80657600  | 0.33825100  |
| H  | -3.14035900  | 0.22487300  | 1.06909000  |
| H  | -1.62037500  | -0.59217700 | 1.42418700  |
| C  | -2.92376900  | -0.10098500 | -1.77692200 |
| H  | -2.14037600  | 0.59315000  | -2.07897300 |
| H  | -3.15884300  | -0.75527200 | -2.62612800 |
| C  | -4.84860900  | -1.41178300 | -0.16295600 |
| C  | -4.18766800  | 0.70853100  | -1.41693500 |
| H  | -3.91871400  | 1.58349100  | -0.80795000 |
| H  | -4.64841200  | 1.10162100  | -2.33220400 |
| C  | -5.12092000  | -0.18021900 | -0.68122600 |
| C  | -6.05016500  | -1.84034000 | 0.48847900  |
| H  | -6.21999500  | -2.76971600 | 1.01440500  |
| C  | -6.97834900  | -0.83771600 | 0.32573100  |
| O  | -6.40432100  | 0.19009000  | -0.39421400 |
| C  | 0.13201400   | 2.45237500  | -2.20744200 |
| O  | -0.40191500  | 1.59711600  | -1.39197400 |
| O  | 1.27025500   | 2.35725700  | -2.68825600 |
| C  | -8.34511900  | -0.76310700 | 0.78337400  |
| H  | -8.63277800  | -1.65812300 | 1.33316700  |
| C  | -9.27931400  | 0.20105600  | 0.64170500  |
| C  | -9.08707600  | 1.50864500  | -0.07936600 |
| H  | -9.27700700  | 2.34932100  | 0.60339400  |
| H  | -8.08877600  | 1.62082900  | -0.49761000 |
| H  | -9.82008600  | 1.60378600  | -0.89330800 |
| C  | -10.65132300 | 0.00673200  | 1.23501600  |

|   |              |             |             |
|---|--------------|-------------|-------------|
| H | -10.88508100 | 0.80422900  | 1.95489000  |
| H | -11.42672200 | 0.05683300  | 0.45716700  |
| H | -10.74731600 | -0.95453100 | 1.74931000  |
| C | 1.40254800   | 2.98930400  | 0.61447200  |
| C | 0.15576600   | 3.09883100  | 1.24908200  |
| C | 2.01898900   | 4.13432500  | 0.10086600  |
| C | -0.45356900  | 4.34241000  | 1.38671200  |
| H | -0.33430600  | 2.21053300  | 1.63354900  |
| C | 1.40213900   | 5.37973300  | 0.23656900  |
| H | 2.97328300   | 4.05740700  | -0.40663200 |
| C | 0.16981500   | 5.48707200  | 0.88054500  |
| H | -1.41791400  | 4.41799400  | 1.88054000  |
| H | 1.88790000   | 6.26443700  | -0.16440500 |
| H | -0.30767500  | 6.45720300  | 0.98461300  |
| C | 3.86463300   | 1.59421000  | -0.09023600 |
| C | 4.94672200   | 1.43288000  | 0.78574700  |
| C | 4.09643600   | 1.88312800  | -1.44745300 |
| C | 6.25195800   | 1.56301500  | 0.31059400  |
| H | 4.77264800   | 1.18737200  | 1.82726500  |
| C | 5.40624500   | 2.01965600  | -1.90881200 |
| H | 3.24837300   | 1.99024600  | -2.11950200 |
| C | 6.48386300   | 1.85566200  | -1.03489400 |
| H | 7.08715300   | 1.42788300  | 0.99169300  |
| H | 5.58222800   | 2.24307700  | -2.95699000 |
| H | 7.50174100   | 1.94946700  | -1.40249800 |
| C | 2.25123600   | 0.74888700  | 2.18133300  |
| C | 2.46340300   | 1.67489200  | 3.21634000  |
| C | 2.17056000   | -0.61686700 | 2.48448600  |
| C | 2.59294400   | 1.23722800  | 4.53324700  |
| H | 2.52234100   | 2.73468400  | 2.99140000  |
| C | 2.30206600   | -1.04840200 | 3.80474900  |
| H | 2.00844700   | -1.33659300 | 1.68958300  |
| C | 2.51149600   | -0.12535800 | 4.82989200  |
| H | 2.75454500   | 1.96067800  | 5.32724300  |
| H | 2.23994100   | -2.10949600 | 4.02804200  |
| H | 2.60964800   | -0.46436300 | 5.85730800  |
| C | -0.75529800  | 3.64856300  | -2.51769600 |
| H | -1.76134900  | 3.31863100  | -2.79669900 |
| H | -0.84918200  | 4.26148600  | -1.61477800 |
| H | -0.32253900  | 4.24995300  | -3.31939700 |

## TS2B

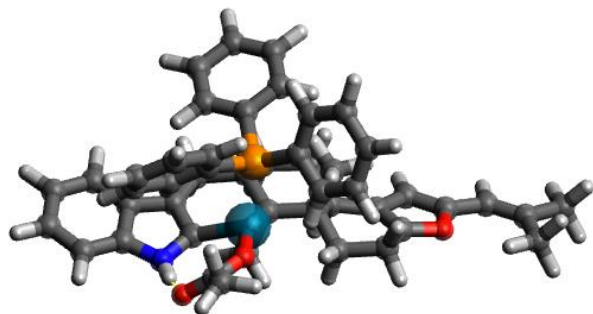

Zero-point correction= 0.838839 (Hartree/Particle)  
Thermal correction to Energy= 0.887837  
Thermal correction to Enthalpy= 0.888781  
Thermal correction to Gibbs Free Energy= 0.753873  
Sum of electronic and zero-point Energies= -2567.831269  
Sum of electronic and thermal Energies= -2567.782271  
Sum of electronic and thermal Enthalpies= -2567.781327  
Sum of electronic and thermal Free Energies= -2567.916235

| Cartesian Coordinates |             |             |             |
|-----------------------|-------------|-------------|-------------|
| Atom                  | X           | Y           | Z           |
| C                     | -2.07350200 | -0.80367800 | -0.31957400 |
| C                     | -0.35259000 | -2.23415800 | 0.99294700  |
| H                     | -0.23123000 | -1.45446100 | 1.75005900  |
| C                     | 0.95623300  | -3.06692600 | 0.97182400  |
| H                     | 1.33680400  | -3.11553900 | 1.99936700  |
| H                     | 0.69587400  | -4.10691200 | 0.71155100  |
| C                     | 3.95004200  | -2.56876600 | -1.24468800 |
| C                     | 3.40236000  | -3.06689700 | -0.02237700 |
| C                     | 2.03486600  | -2.61836300 | 0.03580700  |
| C                     | 1.84942700  | -1.86238100 | -1.10790800 |
| N                     | 2.95290600  | -1.88388100 | -1.92601300 |
| H                     | 3.13811200  | -1.10682000 | -2.60174000 |
| C                     | 4.22554900  | -3.80893700 | 0.84255100  |
| C                     | 5.29437600  | -2.74738300 | -1.58086300 |
| C                     | 5.55936400  | -3.99991200 | 0.50017400  |
| H                     | 6.20871500  | -4.56371500 | 1.16423700  |
| C                     | 6.09000800  | -3.46807200 | -0.69345000 |
| H                     | 7.13847400  | -3.62875700 | -0.92810600 |
| H                     | 3.82911400  | -4.21402800 | 1.77015700  |
| H                     | 5.69555600  | -2.33822700 | -2.50312900 |

|    |             |             |             |
|----|-------------|-------------|-------------|
| C  | -0.70846000 | -1.53362900 | -0.32079600 |
| C  | -0.22522800 | -2.14179400 | -1.54146100 |
| H  | 0.10560500  | -3.17251900 | -1.54897100 |
| H  | -0.62198900 | -1.82772200 | -2.50143000 |
| Pd | 0.75164400  | -0.16708900 | -1.02743600 |
| P  | 1.32382800  | 1.44629600  | 0.74851500  |
| C  | -1.50799600 | -3.16021000 | 1.44662300  |
| H  | -1.52532300 | -4.03364500 | 0.77879600  |
| H  | -1.28207100 | -3.53968500 | 2.45086900  |
| C  | -3.14391500 | -1.90032800 | 0.02583100  |
| H  | -2.99618100 | -2.71408000 | -0.70320000 |
| C  | -2.88848800 | -2.50244300 | 1.41172200  |
| H  | -2.97825100 | -1.72903700 | 2.18314400  |
| H  | -3.65602800 | -3.25343200 | 1.63484100  |
| C  | -2.10574400 | 0.32325300  | 0.73144500  |
| H  | -1.56862400 | 1.20324100  | 0.36786500  |
| H  | -3.13486200 | 0.62108800  | 0.94732800  |
| H  | -1.64808600 | 0.02246900  | 1.67143600  |
| C  | -2.43294200 | -0.19391200 | -1.70120600 |
| H  | -1.63420200 | 0.48309700  | -2.03130200 |
| H  | -2.50380200 | -0.99445700 | -2.44597900 |
| C  | -4.52619900 | -1.34263600 | -0.16930900 |
| C  | -3.77551500 | 0.56755300  | -1.69456800 |
| H  | -3.66068300 | 1.55256500  | -1.21978600 |
| H  | -4.09843100 | 0.75816100  | -2.72554200 |
| C  | -4.76864600 | -0.25841300 | -0.96102700 |
| C  | -5.80114500 | -1.74901600 | 0.34236700  |
| H  | -6.01115300 | -2.57650900 | 1.00584300  |
| C  | -6.73851700 | -0.88257000 | -0.17086800 |
| O  | -6.10126500 | 0.04083600  | -0.97417000 |
| C  | 2.82987000  | 1.32984000  | -2.97039200 |
| O  | 1.75600200  | 1.32496600  | -2.26138600 |
| O  | 3.46429700  | 0.33112300  | -3.36041400 |
| C  | -8.16815800 | -0.84802400 | 0.02552300  |
| H  | -8.50081800 | -1.64624300 | 0.68735900  |
| C  | -9.11275300 | -0.01638900 | -0.46271700 |
| C  | -8.86579300 | 1.14431300  | -1.38913700 |
| H  | -9.22235800 | 2.07746000  | -0.92997700 |
| H  | -7.81633200 | 1.26559100  | -1.64974800 |
| H  | -9.44413200 | 1.01851600  | -2.31558000 |



|   |              |             |             |
|---|--------------|-------------|-------------|
| C | -10.55700500 | -0.21951400 | -0.08205600 |
| H | -10.96232700 | 0.67482200  | 0.41239400  |
| H | -11.17810600 | -0.38714500 | -0.97350200 |
| H | -10.69162200 | -1.07139100 | 0.59155200  |
| C | 0.60764500   | 3.12610400  | 0.77258800  |
| C | 0.12313700   | 3.61406000  | -0.45198200 |
| C | 0.56481600   | 3.94758300  | 1.90846700  |
| C | -0.41165900  | 4.89952300  | -0.53010800 |
| H | 0.20902100   | 2.99232800  | -1.33911200 |
| C | 0.01996400   | 5.22946300  | 1.82623800  |
| H | 0.95814300   | 3.58756500  | 2.85366000  |
| C | -0.47268800  | 5.70489800  | 0.60920000  |
| H | -0.78059400  | 5.27219400  | -1.48144100 |
| H | -0.01481400  | 5.85811900  | 2.71158400  |
| H | -0.89702200  | 6.70306000  | 0.54818500  |
| C | 3.12576500   | 1.72845500  | 0.52976700  |
| C | 3.93909300   | 0.64080700  | 0.17672000  |
| C | 3.69978300   | 3.00101800  | 0.64427400  |
| C | 5.30179800   | 0.81751300  | -0.05011400 |
| H | 3.50687900   | -0.34346500 | 0.06088600  |
| C | 5.06546800   | 3.17629600  | 0.41362400  |
| H | 3.08402000   | 3.85652900  | 0.89898800  |
| C | 5.86801400   | 2.08823200  | 0.06510200  |
| H | 5.90606300   | -0.03982700 | -0.33084800 |
| H | 5.50003500   | 4.16839100  | 0.50072200  |
| H | 6.92817100   | 2.23228400  | -0.12296300 |
| C | 1.16271100   | 0.76411700  | 2.44260900  |
| C | 0.04996700   | 1.04559200  | 3.25173100  |
| C | 2.06923800   | -0.22289500 | 2.86450500  |
| C | -0.15076300  | 0.35787700  | 4.44902200  |
| H | -0.66725100  | 1.79843300  | 2.94438800  |
| C | 1.86345400   | -0.91006400 | 4.05995900  |
| H | 2.93263100   | -0.46542800 | 2.25630600  |
| C | 0.75155200   | -0.62641400 | 4.85526000  |
| H | -1.01644100  | 0.59215300  | 5.06226500  |
| H | 2.57673500   | -1.66943000 | 4.36791200  |
| H | 0.59150200   | -1.16473500 | 5.78490500  |
| C | 3.35998100   | 2.71974900  | -3.29929400 |
| H | 2.53972500   | 3.40795300  | -3.52280200 |
| H | 3.88328600   | 3.10129300  | -2.41435300 |

H 4.06196500 2.67819400 -4.13479200

### CP5B

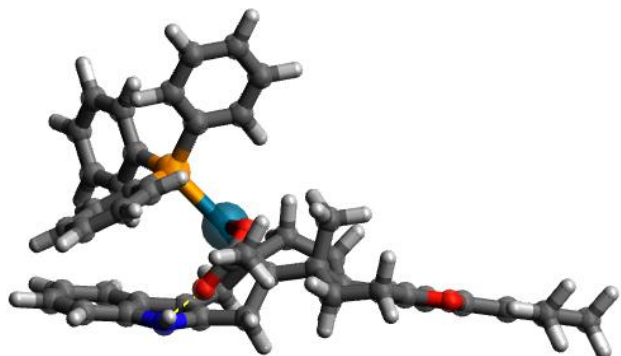

Zero-point correction= 0.839511 (Hartree/Particle)  
Thermal correction to Energy= 0.889003  
Thermal correction to Enthalpy= 0.889947  
Thermal correction to Gibbs Free Energy= 0.752065  
Sum of electronic and zero-point Energies= -2567.877076  
Sum of electronic and thermal Energies= -2567.827583  
Sum of electronic and thermal Enthalpies= -2567.826639  
Sum of electronic and thermal Free Energies= -2567.964521

#### Cartesian Coordinates

| Atom | X           | Y           | Z           |
|------|-------------|-------------|-------------|
| C    | 2.55907700  | -0.26061600 | 0.08786200  |
| C    | 0.78538000  | -1.63533500 | -1.20475000 |
| H    | -0.21934200 | -1.06878800 | -1.50458000 |
| C    | 0.24751700  | -3.10066800 | -1.12498000 |
| H    | -0.22492700 | -3.35759200 | -2.07912700 |
| H    | 1.11992900  | -3.76242400 | -1.01235400 |
| C    | -2.53295300 | -3.06119000 | 1.39608500  |
| C    | -2.09632000 | -3.55696300 | 0.12474900  |
| C    | -0.70760700 | -3.19849500 | 0.01473300  |
| C    | -0.36956200 | -2.55040000 | 1.17693700  |
| N    | -1.44416200 | -2.48966200 | 2.03721900  |
| H    | -1.49331000 | -1.71222600 | 2.69835300  |
| C    | -3.02296200 | -4.20522000 | -0.70852600 |
| C    | -3.86082200 | -3.17340000 | 1.81123300  |
| C    | -4.34672600 | -4.31050400 | -0.29302600 |
| H    | -5.07314800 | -4.80379800 | -0.93310300 |
| C    | -4.76314300 | -3.79266200 | 0.94969000  |
| H    | -5.80417000 | -3.88751200 | 1.24531700  |

|    |             |             |             |
|----|-------------|-------------|-------------|
| H  | -2.71181900 | -4.60868200 | -1.66905600 |
| H  | -4.17826200 | -2.77473800 | 2.76965300  |
| C  | 1.23375900  | -1.03774900 | 0.10804600  |
| C  | 0.95623100  | -1.89244600 | 1.35582800  |
| H  | 1.74727300  | -2.65474200 | 1.47352800  |
| H  | 0.96105300  | -1.27405400 | 2.25126100  |
| Pd | -0.49401800 | 0.09984900  | -0.09911000 |
| P  | -2.59580200 | 1.14316400  | -0.53687900 |
| C  | 1.70577400  | -1.39329800 | -2.42067400 |
| H  | 1.46026900  | -2.14121000 | -3.18246300 |
| H  | 1.45380900  | -0.42925900 | -2.86698000 |
| C  | 3.56709100  | -1.22514700 | -0.62616200 |
| H  | 3.45021200  | -2.20161500 | -0.13026900 |
| C  | 3.22390300  | -1.42470300 | -2.11384100 |
| H  | 3.71631100  | -0.64311100 | -2.70206000 |
| H  | 3.65586400  | -2.37511700 | -2.44637100 |
| C  | 2.43365300  | 1.09387300  | -0.64784600 |
| H  | 1.89456700  | 1.80037100  | -0.01090700 |
| H  | 3.42250200  | 1.50374300  | -0.87569900 |
| H  | 1.88667100  | 1.01912200  | -1.58920600 |
| C  | 3.06754900  | 0.03665300  | 1.52262800  |
| H  | 2.30981600  | 0.62418300  | 2.04822400  |
| H  | 3.19767900  | -0.90390300 | 2.06730700  |
| C  | 4.98012400  | -0.75896100 | -0.41415600 |
| C  | 4.41775000  | 0.78316200  | 1.54636100  |
| H  | 4.28210400  | 1.84679700  | 1.30463500  |
| H  | 4.84305800  | 0.74976100  | 2.55728300  |
| C  | 5.31930400  | 0.12817500  | 0.56499300  |
| C  | 6.19738300  | -1.06975000 | -1.10386800 |
| H  | 6.32556600  | -1.74098700 | -1.94201700 |
| C  | 7.20089400  | -0.34942800 | -0.49873400 |
| O  | 6.65943700  | 0.39271300  | 0.53067000  |
| C  | 8.61160500  | -0.29895300 | -0.80022000 |
| H  | 8.86537200  | -0.94540000 | -1.63908000 |
| C  | 9.61865700  | 0.39493300  | -0.22866700 |
| C  | 11.02186100 | 0.25169200  | -0.76030500 |
| H  | 11.41832900 | 1.22280300  | -1.08966100 |
| H  | 11.70358900 | -0.11000800 | 0.02270600  |
| H  | 11.07557000 | -0.44196600 | -1.60506500 |
| C  | 9.48273000  | 1.33889900  | 0.93625000  |

|   |             |             |             |
|---|-------------|-------------|-------------|
| H | 9.83727100  | 2.34087800  | 0.65494100  |
| H | 8.46035300  | 1.42255600  | 1.29925200  |
| H | 10.12314900 | 1.00959400  | 1.76702400  |
| C | -0.22651100 | 2.24594600  | 3.73410000  |
| H | -0.03866800 | 3.20740800  | 3.25171700  |
| H | -1.09732500 | 2.31548900  | 4.39251800  |
| H | 0.63574000  | 1.98562100  | 4.35905000  |
| C | -0.45712800 | 1.13209300  | 2.71432100  |
| O | -0.89133500 | 0.04010600  | 3.11129100  |
| O | -0.14190600 | 1.45237400  | 1.50332500  |
| C | -2.43133600 | 2.91120000  | -0.96628400 |
| C | -1.19040500 | 3.36276000  | -1.43439500 |
| C | -3.49120400 | 3.82239500  | -0.83950400 |
| C | -1.01485600 | 4.70057800  | -1.78929500 |
| H | -0.36225300 | 2.66253800  | -1.49996200 |
| C | -3.31393300 | 5.15897600  | -1.19374000 |
| H | -4.44711700 | 3.48556600  | -0.44998300 |
| C | -2.07655300 | 5.59859800  | -1.67161000 |
| H | -0.04783900 | 5.04235000  | -2.14710400 |
| H | -4.13868600 | 5.85875800  | -1.09232300 |
| H | -1.93925700 | 6.64161500  | -1.94270000 |
| C | -3.64469800 | 0.40546000  | -1.84473700 |
| C | -4.41136900 | 1.15734400  | -2.74438600 |
| C | -3.67083400 | -0.99558800 | -1.92228600 |
| C | -5.19730100 | 0.51456400  | -3.70175800 |
| H | -4.38972100 | 2.24103500  | -2.70448200 |
| C | -4.47410100 | -1.63406900 | -2.86569900 |
| H | -3.07363800 | -1.58991200 | -1.23788600 |
| C | -5.23551200 | -0.87984600 | -3.76058100 |
| H | -5.78289500 | 1.10547200  | -4.40069800 |
| H | -4.49820600 | -2.71869400 | -2.89351700 |
| H | -5.85393700 | -1.37597800 | -4.50343300 |
| C | -3.65883600 | 1.14614600  | 0.95586400  |
| C | -4.62141200 | 0.15147200  | 1.16576200  |
| C | -3.40626500 | 2.08409700  | 1.96912100  |
| C | -5.32537600 | 0.10148700  | 2.36946000  |
| H | -4.81984700 | -0.59160700 | 0.40178200  |
| C | -4.11376000 | 2.03065700  | 3.16740900  |
| H | -2.64851800 | 2.84609100  | 1.82161900  |
| C | -5.07531600 | 1.03851800  | 3.37197700  |

|   |             |             |            |
|---|-------------|-------------|------------|
| H | -6.06951000 | -0.67567900 | 2.51940800 |
| H | -3.90946100 | 2.76166900  | 3.94475000 |
| H | -5.62339600 | 0.99542900  | 4.30891500 |

### TS3B

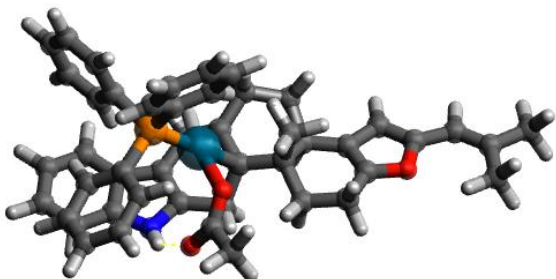

|                                              |                             |
|----------------------------------------------|-----------------------------|
| Zero-point correction=                       | 0.836113 (Hartree/Particle) |
| Thermal correction to Energy=                | 0.885450                    |
| Thermal correction to Enthalpy=              | 0.886395                    |
| Thermal correction to Gibbs Free Energy=     | 0.749408                    |
| Sum of electronic and zero-point Energies=   | -2567.873375                |
| Sum of electronic and thermal Energies=      | -2567.824038                |
| Sum of electronic and thermal Enthalpies=    | -2567.823094                |
| Sum of electronic and thermal Free Energies= | -2567.960080                |

| Cartesian Coordinates |             |             |             |
|-----------------------|-------------|-------------|-------------|
| Atom                  | X           | Y           | Z           |
| C                     | 2.56032100  | -0.37800200 | 0.12984600  |
| C                     | 0.80604700  | -1.62955000 | -1.21547500 |
| H                     | -0.51713600 | -0.75578600 | -1.51713600 |
| C                     | 0.05850000  | -2.97506500 | -1.32756500 |
| H                     | -0.48864900 | -3.01161500 | -2.27577100 |
| H                     | 0.84229000  | -3.74928300 | -1.39294600 |
| C                     | -2.64005300 | -3.13419000 | 1.27299400  |
| C                     | -2.24549800 | -3.50321100 | -0.05305100 |
| C                     | -0.85294900 | -3.16084300 | -0.16248300 |
| C                     | -0.47218600 | -2.64460800 | 1.04972900  |
| N                     | -1.52439200 | -2.65207600 | 1.94062000  |
| H                     | -1.54648100 | -1.92364700 | 2.65819900  |
| C                     | -3.20645200 | -4.04005600 | -0.92557500 |
| C                     | -3.95882300 | -3.26664000 | 1.71003300  |
| C                     | -4.52242300 | -4.16076900 | -0.48975900 |
| H                     | -5.27513600 | -4.56729600 | -1.15972500 |
| C                     | -4.89614800 | -3.77255800 | 0.81235900  |

|    |             |             |             |
|----|-------------|-------------|-------------|
| H  | -5.93105900 | -3.88009400 | 1.12485900  |
| H  | -2.92780500 | -4.34694400 | -1.93091400 |
| H  | -4.24280200 | -2.96882600 | 2.71456500  |
| C  | 1.24704200  | -1.18105100 | 0.07312200  |
| C  | 0.87015600  | -2.04127800 | 1.28813000  |
| H  | 1.62789800  | -2.83392500 | 1.41876200  |
| H  | 0.86072300  | -1.44669800 | 2.19941400  |
| Pd | -0.51467600 | 0.07827700  | -0.14274400 |
| P  | -2.51269600 | 1.21297000  | -0.50825700 |
| C  | 1.63557700  | -1.25861600 | -2.44804800 |
| H  | 1.38742400  | -1.96331100 | -3.24836600 |
| H  | 1.32741100  | -0.27848000 | -2.81449500 |
| C  | 3.56228700  | -1.23522400 | -0.71547700 |
| H  | 3.46492100  | -2.26716100 | -0.34190900 |
| C  | 3.17249800  | -1.24543500 | -2.20297400 |
| H  | 3.59962500  | -0.36271300 | -2.68977000 |
| H  | 3.63376300  | -2.11534100 | -2.68281000 |
| C  | 2.41363100  | 1.05121700  | -0.44162800 |
| H  | 1.84769400  | 1.66576800  | 0.26321700  |
| H  | 3.39685500  | 1.50400700  | -0.60212100 |
| H  | 1.88520200  | 1.07316800  | -1.39673600 |
| C  | 3.08727000  | -0.24958900 | 1.58142700  |
| H  | 2.33980400  | 0.27423300  | 2.18362400  |
| H  | 3.22038900  | -1.24773000 | 2.01169100  |
| C  | 4.97442900  | -0.78035800 | -0.48054400 |
| C  | 4.43834900  | 0.49103100  | 1.67407900  |
| H  | 4.29579400  | 1.57635200  | 1.57462000  |
| H  | 4.88260500  | 0.32977100  | 2.66428500  |
| C  | 5.32480000  | -0.02458200 | 0.59980100  |
| C  | 6.18005100  | -0.98400600 | -1.22782700 |
| H  | 6.29763800  | -1.53900300 | -2.14849000 |
| C  | 7.18872800  | -0.33645000 | -0.55300200 |
| O  | 6.66124200  | 0.25858700  | 0.57457600  |
| C  | 8.59249700  | -0.23021400 | -0.87190300 |
| H  | 8.83481300  | -0.75683200 | -1.79381600 |
| C  | 9.60484500  | 0.39294600  | -0.23228800 |
| C  | 10.99810300 | 0.33762200  | -0.80489900 |
| H  | 11.37927400 | 1.34837800  | -1.00927100 |
| H  | 11.69870800 | -0.11734100 | -0.09018800 |
| H  | 11.04061600 | -0.23670800 | -1.73548300 |

|   |             |             |             |
|---|-------------|-------------|-------------|
| C | 9.48444200  | 1.17208700  | 1.05027400  |
| H | 9.82108500  | 2.20750100  | 0.89731200  |
| H | 8.46960900  | 1.19236600  | 1.44233700  |
| H | 10.14717500 | 0.74469600  | 1.81631800  |
| C | -0.24557100 | 1.95283100  | 3.88686000  |
| H | 0.07864500  | 2.90384200  | 3.45909500  |
| H | -1.16516700 | 2.09572400  | 4.46325500  |
| H | 0.51766600  | 1.58725400  | 4.58306500  |
| C | -0.49329400 | 0.89629200  | 2.81022100  |
| O | -0.94879000 | -0.20494200 | 3.16100700  |
| O | -0.18026400 | 1.26656300  | 1.61606300  |
| C | -2.27343100 | 2.99683900  | -0.81118300 |
| C | -1.01373200 | 3.43271200  | -1.24212700 |
| C | -3.30107700 | 3.93501000  | -0.62764800 |
| C | -0.78788700 | 4.78417700  | -1.50413600 |
| H | -0.21246200 | 2.70783500  | -1.35224600 |
| C | -3.07301500 | 5.28509900  | -0.88957600 |
| H | -4.27107000 | 3.60827300  | -0.26558300 |
| C | -1.81724800 | 5.71040400  | -1.33067100 |
| H | 0.19324300  | 5.11379400  | -1.83369800 |
| H | -3.87262600 | 6.00593500  | -0.74433700 |
| H | -1.64041700 | 6.76363200  | -1.52968300 |
| C | -3.58072800 | 0.60402700  | -1.86510000 |
| C | -4.34362200 | 1.44554700  | -2.68456300 |
| C | -3.64713900 | -0.78450100 | -2.05186400 |
| C | -5.16464700 | 0.90176200  | -3.67353800 |
| H | -4.29141600 | 2.52169800  | -2.56045000 |
| C | -4.48675400 | -1.32459000 | -3.02412500 |
| H | -3.05158000 | -1.44313300 | -1.42868600 |
| C | -5.24341800 | -0.48192800 | -3.84087200 |
| H | -5.74540300 | 1.56173400  | -4.31201100 |
| H | -4.54378500 | -2.40272000 | -3.13657800 |
| H | -5.88961100 | -0.90100400 | -4.60715500 |
| C | -3.57675200 | 1.13509600  | 0.97966600  |
| C | -4.52135300 | 0.11273200  | 1.13228400  |
| C | -3.34968100 | 2.02768900  | 2.03843800  |
| C | -5.23540800 | -0.00724300 | 2.32434900  |
| H | -4.69883500 | -0.59845200 | 0.33369100  |
| C | -4.06789400 | 1.90380500  | 3.22524800  |
| H | -2.60218200 | 2.80662500  | 1.93751800  |

|   |             |             |            |
|---|-------------|-------------|------------|
| C | -5.01276600 | 0.88611600  | 3.37211200 |
| H | -5.96326000 | -0.80641000 | 2.42948200 |
| H | -3.88442900 | 2.60005700  | 4.03880500 |
| H | -5.56852800 | 0.78846800  | 4.30038500 |

### CP6B

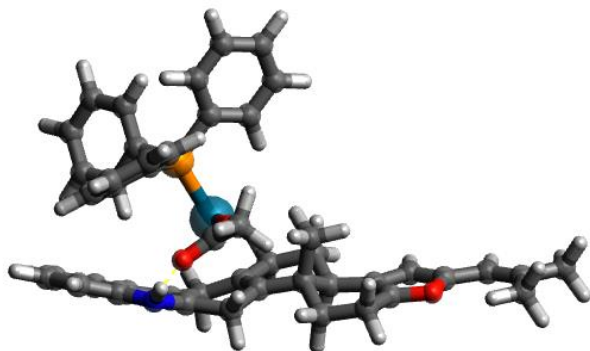

|                                              |                             |
|----------------------------------------------|-----------------------------|
| Zero-point correction=                       | 0.837338 (Hartree/Particle) |
| Thermal correction to Energy=                | 0.887071                    |
| Thermal correction to Enthalpy=              | 0.888015                    |
| Thermal correction to Gibbs Free Energy=     | 0.750315                    |
| Sum of electronic and zero-point Energies=   | -2567.885919                |
| Sum of electronic and thermal Energies=      | -2567.836186                |
| Sum of electronic and thermal Enthalpies=    | -2567.835242                |
| Sum of electronic and thermal Free Energies= | -2567.972942                |

#### Cartesian Coordinates

| Atom | X           | Y           | Z           |
|------|-------------|-------------|-------------|
| C    | 2.69526800  | -1.13043900 | 0.22176500  |
| C    | 0.96790400  | -2.07381100 | -1.36696000 |
| H    | -0.90208400 | -0.17221100 | -1.74908500 |
| C    | -0.18686300 | -3.00570400 | -1.71986700 |
| H    | -0.66881400 | -2.65511400 | -2.64062100 |
| H    | 0.25270500  | -3.98760400 | -1.96975800 |
| C    | -3.02013900 | -3.04342000 | 0.74842900  |
| C    | -2.60004700 | -3.29331200 | -0.59641000 |
| C    | -1.17742900 | -3.08978500 | -0.60922500 |
| C    | -0.80374200 | -2.78133600 | 0.67776200  |
| N    | -1.90102400 | -2.78150500 | 1.51796700  |
| H    | -1.90406700 | -2.13925200 | 2.33214800  |
| C    | -3.56221800 | -3.61832900 | -1.56663600 |
| C    | -4.37021900 | -3.05939400 | 1.10803800  |
| C    | -4.90478500 | -3.64566600 | -1.20118900 |



|    |             |             |             |
|----|-------------|-------------|-------------|
| H  | -5.65918600 | -3.89716400 | -1.94192000 |
| C  | -5.30524400 | -3.35627600 | 0.11925800  |
| H  | -6.36146400 | -3.37849300 | 0.37258600  |
| H  | -3.26355600 | -3.83440800 | -2.58950000 |
| H  | -4.67378500 | -2.84618600 | 2.12856200  |
| C  | 1.36908700  | -1.85578200 | -0.07997400 |
| C  | 0.60256900  | -2.48406900 | 1.08611200  |
| H  | 1.11524300  | -3.40870600 | 1.39854600  |
| H  | 0.61299900  | -1.81728800 | 1.94918900  |
| Pd | -0.69469100 | -0.07408200 | -0.21774000 |
| P  | -2.35336500 | 1.42950600  | -0.35320300 |
| C  | 1.74195700  | -1.60739100 | -2.58186100 |
| H  | 2.01537000  | -2.51293700 | -3.14608100 |
| H  | 1.06733700  | -1.04556000 | -3.23906000 |
| C  | 3.64556400  | -1.33988500 | -1.00016600 |
| H  | 3.73093600  | -2.43127600 | -1.13449900 |
| C  | 3.00813400  | -0.79992600 | -2.27828700 |
| H  | 2.77672400  | 0.26400600  | -2.16406700 |
| H  | 3.70544400  | -0.87909000 | -3.11999700 |
| C  | 2.43673700  | 0.37012500  | 0.48670900  |
| H  | 1.84628300  | 0.50480100  | 1.39472300  |
| H  | 3.37564400  | 0.92461100  | 0.57369600  |
| H  | 1.85836400  | 0.81823300  | -0.32736500 |
| C  | 3.39640800  | -1.74579900 | 1.46645900  |
| H  | 2.73076700  | -1.71206800 | 2.33265500  |
| H  | 3.60893200  | -2.80331100 | 1.26376300  |
| C  | 5.01427800  | -0.80916600 | -0.68686900 |
| C  | 4.71653600  | -1.03210500 | 1.84099900  |
| H  | 4.50576300  | -0.10916200 | 2.40000700  |
| H  | 5.30401000  | -1.66975600 | 2.51405000  |
| C  | 5.46598800  | -0.72286900 | 0.59674700  |
| C  | 6.08687000  | -0.34540500 | -1.51419500 |
| H  | 6.10242900  | -0.26988700 | -2.59278600 |
| C  | 7.12413700  | -0.00172400 | -0.67749200 |
| O  | 6.74072300  | -0.23209300 | 0.62793300  |
| C  | 8.43232700  | 0.51841800  | -0.99551000 |
| H  | 8.56664600  | 0.63473400  | -2.06997900 |
| C  | 9.46758500  | 0.86794900  | -0.20270100 |
| C  | 10.73908400 | 1.39200400  | -0.81981900 |
| H  | 10.96926000 | 2.40110600  | -0.44894700 |

|   |             |             |             |
|---|-------------|-------------|-------------|
| H | 11.59720500 | 0.76069700  | -0.54804400 |
| H | 10.68156300 | 1.43581600  | -1.91183700 |
| C | 9.48749300  | 0.78584400  | 1.30045900  |
| H | 9.68521200  | 1.77789300  | 1.73128800  |
| H | 8.55717100  | 0.40614500  | 1.71806400  |
| H | 10.31077800 | 0.13775900  | 1.63370100  |
| C | -0.31100700 | 1.05902000  | 4.14666900  |
| H | -0.26187600 | 2.09821800  | 3.80979800  |
| H | -0.94864300 | 0.97357700  | 5.02886600  |
| H | 0.70790200  | 0.75517200  | 4.41745400  |
| C | -0.82095200 | 0.15041400  | 3.02782700  |
| O | -1.61316100 | -0.76339600 | 3.32146600  |
| O | -0.31759500 | 0.41331700  | 1.87308400  |
| C | -1.75093100 | 3.13574100  | -0.57268600 |
| C | -0.47144500 | 3.33195900  | -1.10907900 |
| C | -2.54006800 | 4.24969100  | -0.24379300 |
| C | 0.00952900  | 4.62319900  | -1.32489200 |
| H | 0.14017400  | 2.46575900  | -1.34315800 |
| C | -2.05495900 | 5.53876500  | -0.45936500 |
| H | -3.52330000 | 4.10721600  | 0.19325100  |
| C | -0.78124600 | 5.72674200  | -1.00131600 |
| H | 1.00403400  | 4.76604500  | -1.73722100 |
| H | -2.66928500 | 6.39604800  | -0.19971200 |
| H | -0.40407100 | 6.73233400  | -1.16381400 |
| C | -3.58108800 | 1.13460100  | -1.67505100 |
| C | -4.27318300 | 2.17968900  | -2.30081000 |
| C | -3.87435900 | -0.19318100 | -2.01461200 |
| C | -5.25058000 | 1.89519500  | -3.25462100 |
| H | -4.04391200 | 3.21140200  | -2.05826500 |
| C | -4.86601800 | -0.47180500 | -2.95355300 |
| H | -3.33221900 | -1.00679300 | -1.54517600 |
| C | -5.55260100 | 0.57101600  | -3.57783200 |
| H | -5.77552700 | 2.71013600  | -3.74504400 |
| H | -5.09288600 | -1.50612300 | -3.18942700 |
| H | -6.31798200 | 0.35370600  | -4.31761500 |
| C | -3.32813400 | 1.42149900  | 1.18858400  |
| C | -4.34758400 | 0.47359200  | 1.34919900  |
| C | -2.97609200 | 2.24934500  | 2.26350400  |
| C | -5.01324000 | 0.36720600  | 2.56829400  |
| H | -4.61465100 | -0.19256100 | 0.53666300  |

|   |             |             |            |
|---|-------------|-------------|------------|
| C | -3.65012200 | 2.14076000  | 3.47771500 |
| H | -2.16572100 | 2.96176400  | 2.15797700 |
| C | -4.66850200 | 1.19946400  | 3.63331800 |
| H | -5.79769500 | -0.37481000 | 2.68426200 |
| H | -3.36825600 | 2.78305800  | 4.30686100 |
| H | -5.18418400 | 1.10868600  | 4.58484300 |

## Computational Methods for Attractive Dispersion

To study the origin of the dispersion interactions between the ligands and the substrate, separate dispersion calculations were performed for groups that were informed to experience such interactions via the NCI analysis. For the CataCXium ligand, dispersive effects were evaluated between the *tert*-butyl group of CataCXium and the indole of the substrate as well as the indole of CataCXium and the methyl group of *trans*-decalin in the substrate. As for PPh<sub>3</sub>, calculations were performed for the interactions of the Ph groups with the indole of the substrate and the methyl of the *trans*-decalin. The geometries for each of these dispersion calculations were taken from the optimized transition state structures. To isolate the structures of interest to dispersion, per Peng Liu's method, C-C, C-N and C-P bonds were cleaved and atoms that were not of interest were deleted. Hydrogen atoms were added to dangling carbon atoms at a distance of 1.07 Å in the same direction as the cleaved bonds (Figure S3).

Calculations of the dispersive interaction energies were based on density functional theory (DFT) calculations using the Gaussian 16 suite of programs (revision A3). Single point energy calculations were performed using the M06 functional<sup>11</sup> and the 6-311+G(d,p) basis set<sup>10</sup> with Grimme's D3(BJ) dispersion correction.<sup>12</sup> The total calculated dispersion energy for the CataCXium ligand was 3.9 kcal/mol and for PPh<sub>3</sub> it was 1.8 kcal/mol (Figure S4). The higher attractive dispersion interactions help account for the effectiveness of the CataCXium ligand for the Heck cyclization.

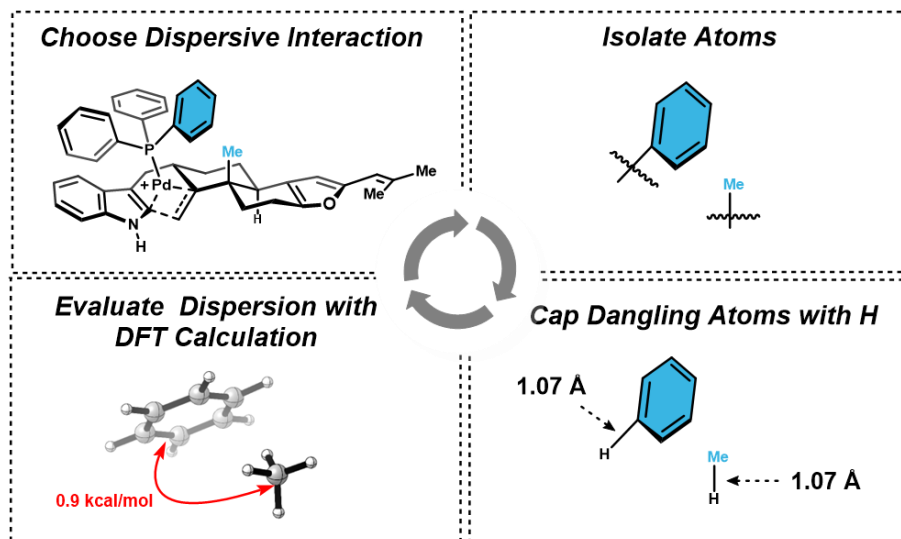

Figure S3. Method to Evaluate Attractive Dispersion Interactions

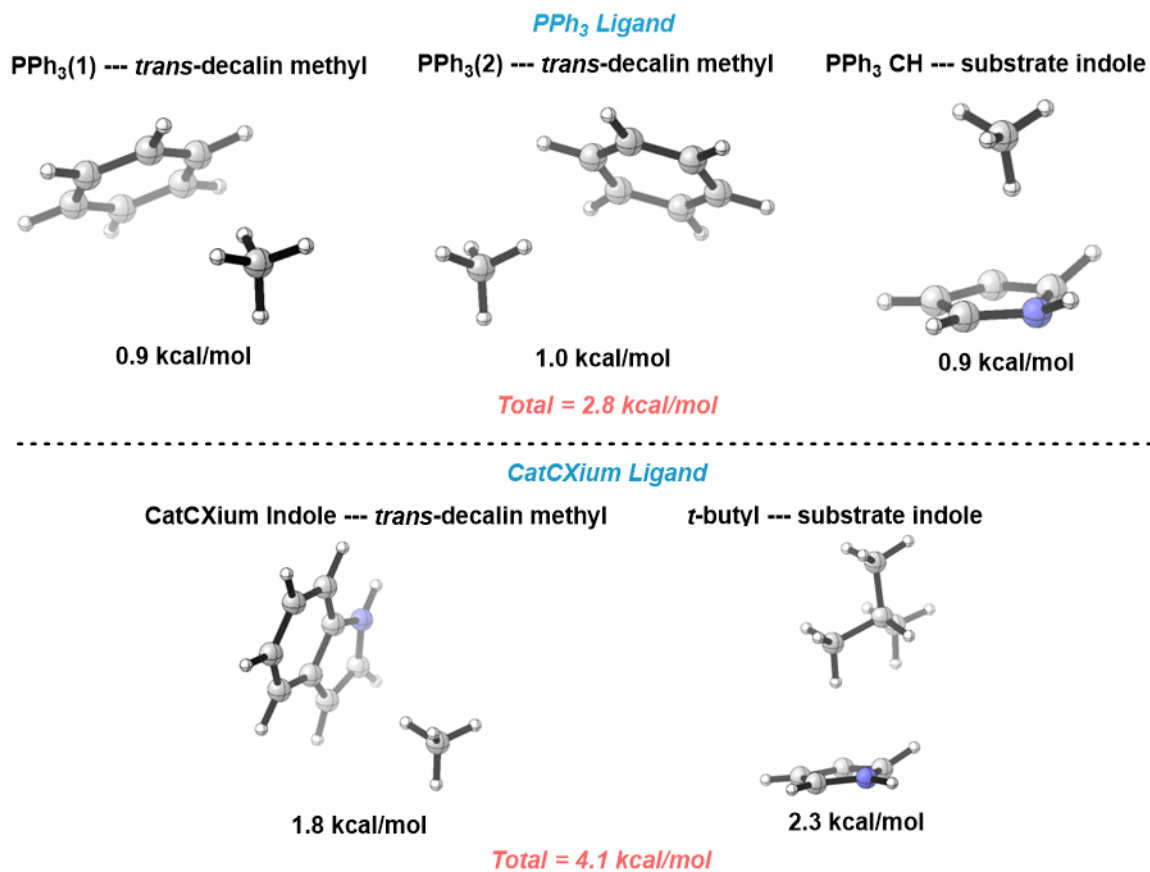

Figure S4. Evaluation of Attractive Dispersion Interactions via DFT Calculations Using Grimme's D3(BJ) Dispersion Correction.

### Determining Anion-Ligand/Substrate Interactions

To evaluate the interactions between the acetate anion and the substrate and ligand, bond distances were analyzed for possible stabilizing interactions ( $< 3 \text{ \AA}$ ). CatCXium was found to have more associative interactions with the ligand and substrate than  $\text{PPh}_3$  (Table S3 and Table S4). With the acetate anion interacting to a greater extent with the ligand of CatCXium, the distance between the acetate and Pd becomes greater ( $2.62 \text{ \AA}$  compared to  $2.18 \text{ \AA}$  for  $\text{PPh}_3$ ), which can then allow for a more efficient migratory insertion step of the transition state.

Table S3. Associated Distances between the CatCXium Ligand, Substrate and the Coordinating Acetate Anion.

| Acetate O | Neighboring H                | Distance ( $\text{\AA}$ ) |
|-----------|------------------------------|---------------------------|
| O 114     | H 12 ( $^t\text{Bu C-H}$ )   | 2.25                      |
| O 114     | H 119 (substrate indole N-H) | 1.66                      |
| O 115     | H 64 (ligand indole C-H)     | 2.07                      |
| O 115     | H 24 (vicinal C-H)           | 2.40                      |
| O 115     | H 40 (substrate C-H)         | 2.24                      |
| O 115     | Pd                           | 2.62                      |

Table S4. Associated Distances between the  $\text{PPh}_3$  Ligand, Substrate and the Coordinating Acetate Anion.

| Acetate O | Neighboring H               | Distance ( $\text{\AA}$ ) |
|-----------|-----------------------------|---------------------------|
| O 53      | H 12 (substrate indole N-H) | 1.66                      |
| O 52      | H 69 (Ph C-H)               | 2.45                      |
| O 52      | H 24 (vicinal C-H)          | 3.96                      |
| O 52      | Pd                          | 2.18                      |

**CatCXium Indole --- trans-decalin methyl**

|   |          |          |          |
|---|----------|----------|----------|
| C | 2.32590  | 2.25920  | -1.04280 |
| H | 1.90930  | 1.39830  | -0.51310 |
| H | 1.48780  | 2.83750  | -1.43930 |
| H | 2.89350  | 1.88140  | -1.89530 |
| C | -0.01620 | -0.05360 | 0.79330  |
| C | -0.28420 | -0.85670 | -0.34260 |
| C | -1.48140 | -0.75800 | -1.05980 |
| C | -2.40600 | 0.18460  | -0.62460 |
| C | -2.15590 | 1.00120  | 0.49940  |
| C | -0.97270 | 0.88670  | 1.21550  |
| C | 1.28450  | -0.41960 | 1.26140  |
| H | -1.67760 | -1.38920 | -1.91990 |
| H | -3.34410 | 0.29320  | -1.16130 |
| H | -2.90480 | 1.72480  | 0.80700  |
| H | -0.78190 | 1.50440  | 2.08800  |
| H | 1.79960  | 0.00820  | 2.11810  |
| C | 1.78320  | -1.42610 | 0.43290  |
| N | 0.81090  | -1.69490 | -0.55170 |
| H | 0.76200  | -2.42880 | -1.22920 |
| H | 2.79640  | -1.72950 | 0.59510  |
| H | 2.92060  | 2.85700  | -0.38400 |

**t-butyl --- substrate indole**

|   |          |          |          |
|---|----------|----------|----------|
| C | 2.42290  | -1.48710 | -0.33670 |
| C | 2.30030  | -0.24070 | -1.03850 |
| C | 1.79860  | 0.71620  | -0.09760 |
| C | 1.62940  | 0.02030  | 1.09590  |
| N | 2.00900  | -1.29370 | 0.96080  |
| H | 2.03740  | -1.92890 | 1.79580  |
| C | -2.46090 | -0.23610 | 0.28690  |
| C | -1.46460 | -0.61720 | -0.83190 |
| H | -1.45570 | -1.68670 | -1.04470 |
| H | -1.77030 | -0.10260 | -1.75180 |
| H | -0.44650 | -0.30300 | -0.59550 |
| C | -3.85930 | -0.72850 | -0.11040 |
| H | -4.14070 | -0.25840 | -1.06160 |
| H | -3.87420 | -1.81040 | -0.26930 |
| H | -4.62410 | -0.47710 | 0.62210  |
| C | -2.43690 | 1.29950  | 0.40020  |
| H | -3.07380 | 1.67220  | 1.20100  |
| H | -1.41710 | 1.65350  | 0.58160  |
| H | -2.78980 | 1.73270  | -0.54400 |
| H | -2.05360 | -0.61250 | 1.20200  |
| H | 0.86850  | 0.25000  | 1.81230  |
| H | 2.55470  | -0.19740 | -1.97730 |

|   |         |          |          |
|---|---------|----------|----------|
| H | 2.74670 | -2.29170 | -0.77930 |
| H | 1.76380 | 1.78260  | -0.17810 |

**PPh3(1) --- trans-decalin methyl**

|   |          |          |          |
|---|----------|----------|----------|
| C | -0.62840 | 1.14810  | -0.34850 |
| C | -1.02410 | 0.01570  | -1.12510 |
| C | -1.04430 | -1.11550 | -0.23370 |
| C | -0.63390 | -0.62210 | 0.99190  |
| N | -0.45660 | 0.74000  | 0.96740  |
| H | 0.18740  | 1.21190  | 1.64360  |
| C | 2.61680  | -0.18580 | -0.24320 |
| H | 1.58970  | -0.16520 | 0.05600  |
| H | 0.01420  | -1.20590 | 1.61160  |
| H | -1.45900 | -2.08600 | -0.40970 |
| H | -1.19370 | 0.13090  | -2.07700 |
| H | -0.48430 | 2.02380  | -0.74910 |
| H | 2.97780  | 0.81590  | -0.34860 |
| H | 3.14220  | -0.65070 | 0.43210  |
| H | 2.70560  | -0.69730 | -1.17880 |

**PPh3(2) --- trans-decalin methyl**

|   |          |          |          |
|---|----------|----------|----------|
| C | 3.37370  | -0.00080 | -0.58970 |
| H | 3.44580  | -0.61600 | 0.31110  |
| H | 4.01880  | 0.87110  | -0.45560 |
| H | 2.34940  | 0.35820  | -0.66280 |
| C | 0.02980  | -1.00530 | 0.68080  |
| C | 0.32980  | 0.35350  | 0.86980  |
| C | -1.11890 | -1.34520 | -0.05340 |
| C | -0.49580 | 1.34460  | 0.33800  |
| H | 1.21430  | 0.64090  | 1.42720  |
| C | -1.93960 | -0.35190 | -0.58580 |
| H | -1.37050 | -2.38580 | -0.22060 |
| C | -1.63030 | 0.99640  | -0.39660 |
| H | -0.24790 | 2.39030  | 0.49750  |
| H | -2.82330 | -0.63630 | -1.15020 |
| H | -2.26940 | 1.76870  | -0.81450 |
| H | 0.72250  | -1.77790 | 0.94180  |
| H | 3.66880  | -0.56080 | -1.45230 |

**PPh3 CH --- substrate indole**

|   |          |          |          |
|---|----------|----------|----------|
| C | -3.70650 | 0.00290  | -0.57200 |
| H | -2.71220 | -0.31490 | -0.24730 |
| H | -3.76390 | -0.12260 | -1.65610 |
| H | -3.79850 | 1.06600  | -0.36030 |
| C | -0.15500 | 0.41070  | 0.99040  |
| C | 0.09290  | -0.95640 | 0.78540  |



|   |          |          |          |
|---|----------|----------|----------|
| C | 0.64830  | 1.36220  | 0.34520  |
| C | 1.11940  | -1.36070 | -0.06740 |
| H | -0.49820 | -1.68750 | 1.33030  |
| C | 1.66790  | 0.95170  | -0.51420 |
| H | 0.47910  | 2.42050  | 0.51570  |
| C | 1.90160  | -0.40880 | -0.72500 |
| H | 1.30850  | -2.41970 | -0.21800 |
| H | 2.28260  | 1.69450  | -1.01480 |
| H | 2.69570  | -0.72560 | -1.39520 |
| H | -0.94050 | 0.65290  | 1.67540  |
| H | -4.46390 | -0.57400 | -0.08370 |

## References

---

- (1) Bottoni, A.; Lombardo, M.; Miscione, G. P.; Algue, J. B. Pujol; Trombini, C. 3-Bromozinc Propenyl Esters: an Experimental and Theoretical Study of the Unique Stereocrossover Observed in Their Addition to Aromatic and Aliphatic Aldehydes. *J. Org. Chem.* **2008**, *73*, 418–426.
- (2) Liu, R.; Zhang, P.; Gan, T.; Cook, J. M. Regiospecific Bromination of 3-Methylindoles with NBS and Its Application to the Concise Synthesis of Optically Active Unusual Tryptophans Present in Marine Cyclic Peptides. *J. Org. Chem.* **1997**, *62*, 7447–7456.
- (3) Gaussian 16, Revision C.01, Frisch, M. J.; Trucks, G. W.; Schlegel, H. B.; Scuseria, G. E.; Robb, M. A.; Cheeseman, J. R.; Scalmani, G.; Barone, V.; Petersson, G. A.; Nakatsuji, H.; Li, X.; Caricato, M.; Marenich, A. V.; Bloino, J.; Janesko, B. G.; Gomperts, R.; Mennucci, B.; Hratchian, H. P.; Ortiz, J. V.; Izmaylov, A. F.; Sonnenberg, J. L.; Williams-Young, D.; Ding, F.; Lipparini, F.; Egidi, F.; Goings, J.; Peng, B.; Petrone, A.; Henderson, T.; Ranasinghe, D.; Zakrzewski, V. G.; Gao, J.; Rega, N.; Zheng, G.; Liang, W.; Hada, M.; Ehara, M.; Toyota, K.; Fukuda, R.; Hasegawa, J.; Ishida, M.; Nakajima, T.; Honda, Y.; Kitao, O.; Nakai, H.; Vreven, T.; Throssell, K.; Montgomery, J. A.; Jr.; Peralta, J. E.; Ogliaro, F.; Bearpark, M. J.; Heyd, J. J.; Brothers, E. N.; Kudin, K. N.; Staroverov, V. N.; Keith, T. A.; Kobayashi, R.; Normand, J.; Raghavachari, K.; Rendell, A. P.; Burant, J. C.; Iyengar, S. S.; Tomasi, J.; Cossi, M.; Millam, J. M.; Klene, M.; Adamo, C.; Cammi, R.; Ochterski, J. W.; Martin, R. L.; Morokuma, K.; Farkas, O.; Foresman, J. B.; Fox, D. J. Gaussian, Inc.; Wallingford CT, **2016**.
- (4) Becke, A. D. Density-functional exchange-energy approximation with correct asymptotic behavior. *Phys. Rev.* **1988**, *A 38*, 3098–3100.
- (5) Hay, P. J.; Wadt, W. R. Ab initio Effective Core Potentials for Molecular Calculations – Potentials for the Transition-Metal Atoms Sc to Hg,” *J. Chem. Phys.* **1985**, *82*, 270–283.
- (6) Ditchfield, R.; Hehre, W. J.; Pople, J. A. Self-Consistent Molecular Orbital Methods. 9. Extended Gaussian-type Basis for Molecular-Orbital Studies of Organic Molecules. *J. Chem. Phys.* **1971**, *54*, 724–728.
- (7) Fukui, K. The Path of Chemical Reactions-the IRC Approach. *Acc. Chem. Res.* **1981**, *14*, 363–368.
- (8) Chai, J.-D.; Head-Gordon, M. Long-Range Corrected Hybrid Density Functionals with Damped Atom-Atom Dispersion Corrections. *Phys. Chem. Chem. Phys.* **2008**, *10*, 6615–6620.
- (9) Fuentealba, P.; Preuss, H.; Stoll, H.; Szentpály, L. S. A Proper Account of Core-polarization with Pseudopotentials – Single Valence-Electron Alkali Compounds. *Chem. Phys. Lett.* **1982**, *89*, 418–422.
- (10) McLean, A. D.; Chandler, G. S. Contracted Gaussian-Basis Sets for Molecular Calculations. 1. 2nd Row Atoms, Z=11-18. *J. Chem. Phys.* **1980**, *72*, 5639–5648.
- (14) Zhao, Y.; Truhlar, D. G. The M06 Suite of Density Functionals for Main Group Thermochemistry, Thermochemical Kinetics, Noncovalent Interactions, Excited States, and Transition Elements: Two New Functionals and Systematic Testing of Four M06-class Functionals and 12 Other Functionals. *Theor. Chem. Acc.* **2008**, *120*, 215–241.
- (12) Grimme, S.; Ehrlich, S.; Goerigk, L. Effect of the Damping Function in Dispersion Corrected Density Functional Theory. *J. Comp. Chem.* **2011**, *32*, 1456–1465.
